# Supplementary material for: Impact of social inequalities at birth on the longevity of children born 1914–1916: A cohort study
Source: PLOS journal article supplement (doi:10.1371/journal.pone.0185848), 2017-10-16

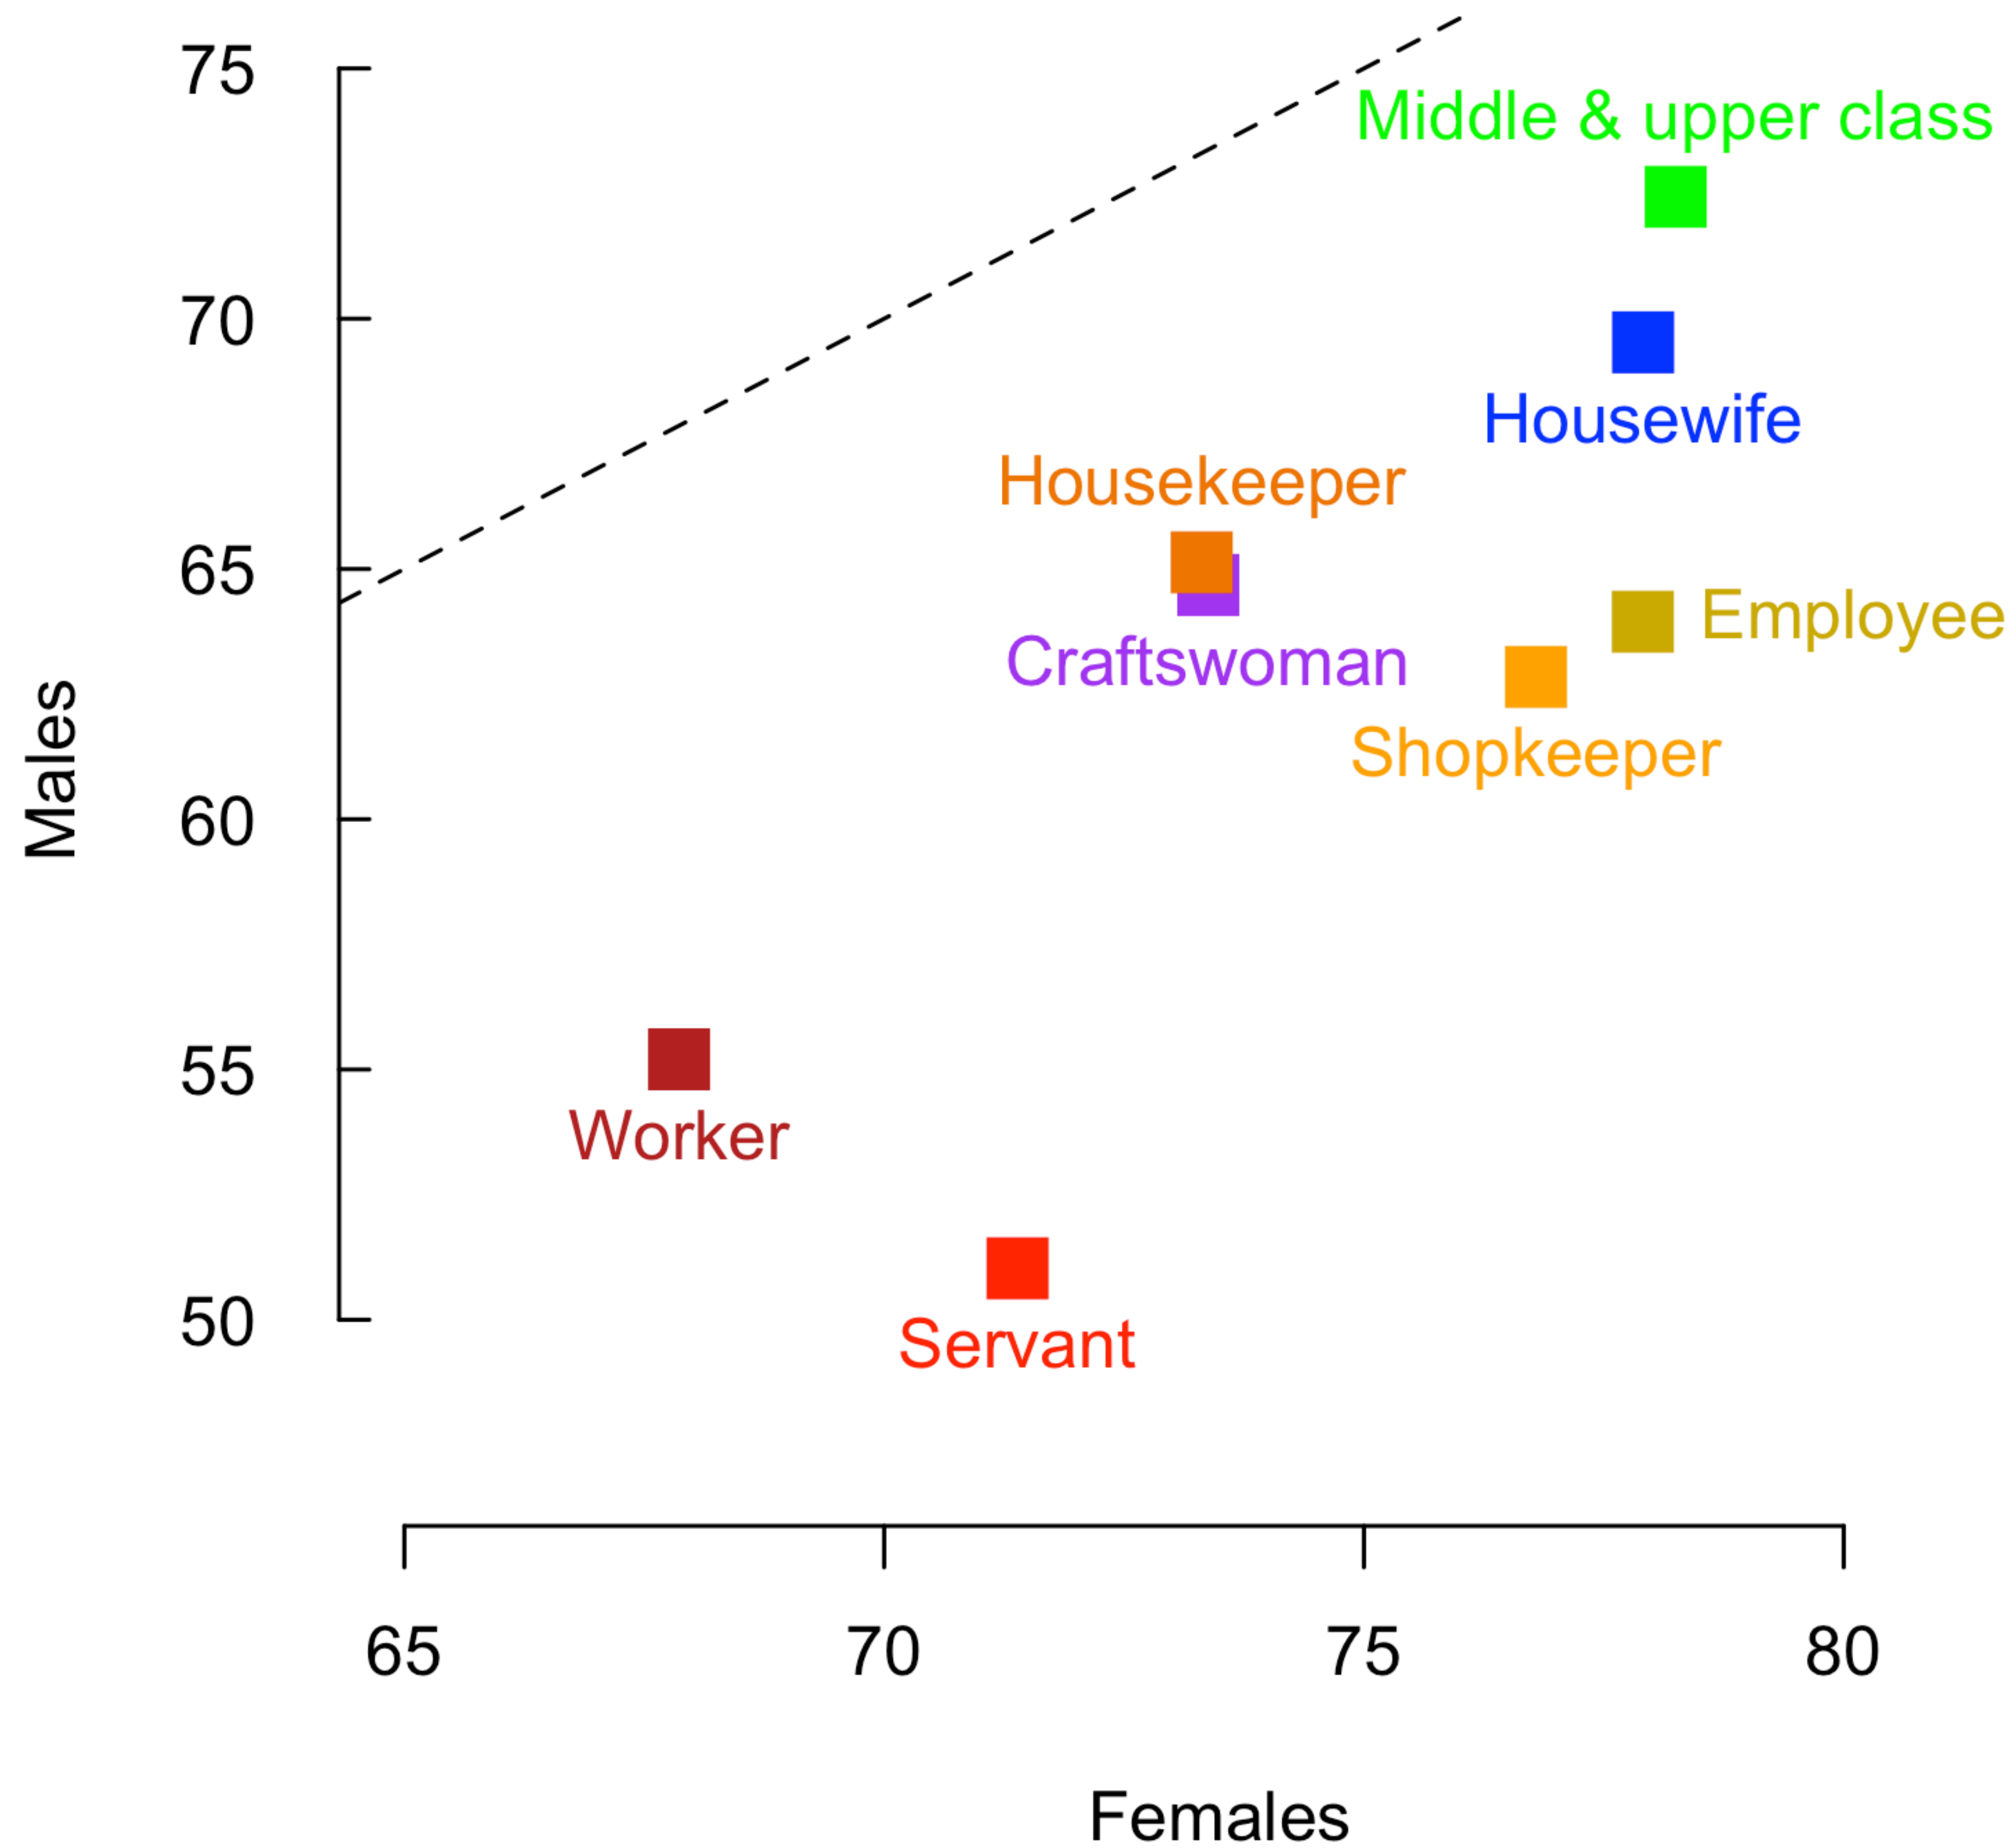

Supplement: S1 (10.1371/journal.pone.0185848.s001) [file journal.pone.0185848.s001]
