# Supplementary material for: Impact of social inequalities at birth on the longevity of children born 1914–1916: A cohort study
Source: PLoS One. 2017 Oct 16;12(10):e0185848. doi: 10.1371/journal.pone.0185848 (PMC5643053; doi:10.1371/journal.pone.0185848)
Supplement: S1 File — (CSV) [file pone.0185848.s004.csv]

	district	sex	legitimate	birthtime	PaternalAge	MaternalAge	PaternalOccupCategory	MaternalOccupCategory	lifespan	lifespan_with_imput	vital_status	vital_status31
1	district_6	M	TRUE	-9	30	23	Middle class	Shopkeeper	48	48	DeathObserved	1
2	district_6	F	TRUE	6	31	24	Craftsman	Craftswoman	94	94	DeathObserved	1
3	district_6	M	TRUE	1	24	24	Employee	Servant	46	46	DeathObserved	1
4	district_6	F	TRUE	6	29	28	Employee	Craftswoman	85	85	DeathObserved	1
5	district_6	F	TRUE	6	30	23	Upper class	Housewife	93	93	DeathObserved	1
6	district_6	F	TRUE	-1	23	28	Employee	Employee	NA	NA	DeathBefore31	0
7	district_6	M	TRUE	6	49	36	Worker	Housekeeper	NA	NA	DeathBefore31	0
8	district_6	F	TRUE	24	35	33	Craftsman	Servant	78	78	DeathObserved	1
9	district_6	M	TRUE	16	28	26	Shopkeeper	Housewife	84	84	DeathObserved	1
10	district_6	M	TRUE	44	30	29	Craftsman	Worker	NA	NA	DeathBefore31	0
11	district_6	M	TRUE	42	27	23	Craftsman	Housewife	NA	NA	DeathBefore31	0
12	district_6	F	TRUE	58	29	23	Employee	Servant	NA	101	Alive99	1
13	district_6	F	TRUE	75	27	24	Employee	Housewife	86	86	DeathObserved	1
14	district_6	F	TRUE	81	40	36	Shopkeeper	Housewife	54	54	DeathObserved	1
15	district_6	M	TRUE	76	38	37	Employee	Servant	46	46	DeathObserved	1
16	district_6	F	FALSE	89	NA	23	NA	Craftswoman	72	72	DeathObserved	1
17	district_6	M	TRUE	81	31	20	Shopkeeper	Servant	63	63	DeathObserved	1
18	district_6	M	TRUE	97	41	33	Employee	Employee	77	77	DeathObserved	1
19	district_6	M	TRUE	105	27	25	Worker	Shopkeeper	NA	NA	DeathBefore31	0
20	district_6	F	FALSE	99	NA	18	NA	Craftswoman	NA	NA	DeathBefore31	0
21	district_6	M	TRUE	116	26	24	Craftsman	Shopkeeper	52	52	DeathObserved	1
22	district_6	F	TRUE	119	30	25	Upper class	Housewife	NA	101	Alive99	1
23	district_6	F	TRUE	126	37	32	Craftsman	Craftswoman	45	45	DeathObserved	1
24	district_6	M	TRUE	128	40	36	Employee	Housewife	83	83	DeathObserved	1
25	district_6	F	TRUE	154	25	30	Shopkeeper	Shopkeeper	78	78	DeathObserved	1
26	district_6	F	FALSE	157	NA	27	NA	Housewife	82	82	DeathObserved	1
27	district_6	M	TRUE	143	26	29	Upper class	UpperMiddleClass	NA	101	Alive99	1
28	district_6	M	TRUE	174	37	29	Craftsman	Craftswoman	90	90	DeathObserved	1
29	district_6	F	TRUE	179	34	25	Shopkeeper	Shopkeeper	84	84	DeathObserved	1
30	district_6	M	TRUE	183	20	24	Employee	Craftswoman	45	45	DeathObserved	1
31	district_6	F	TRUE	184	32	25	Worker	Worker	NA	NA	DeathBefore31	0
32	district_6	F	TRUE	190	25	27	Upper class	Employee	NA	NA	DeathBefore31	0
33	district_6	M	TRUE	181	26	26	Craftsman	Craftswoman	63	63	DeathObserved	1
34	district_6	F	FALSE	185	NA	20	NA	Housekeeper	74	74	DeathObserved	1
35	district_6	M	TRUE	188	31	19	Upper class	Housewife	NA	NA	DeathBefore31	0
36	district_6	M	TRUE	196	30	29	Shopkeeper	Housewife	94	94	DeathObserved	1
37	district_6	F	TRUE	202	32	31	Craftsman	Housewife	90	90	DeathObserved	1
38	district_6	M	TRUE	194	28	27	Craftsman	Craftswoman	62	62	DeathObserved	1
39	district_6	F	TRUE	205	18	22	Craftsman	Servant	NA	NA	DeathBefore31	0
40	district_6	F	TRUE	213	25	24	Craftsman	Housekeeper	80	80	DeathObserved	1
41	district_6	M	TRUE	234	29	32	Employee	Housewife	NA	101	Alive99	1
42	district_6	F	TRUE	237	25	22	Upper class	Housewife	90	90	DeathObserved	1
43	district_6	M	TRUE	239	29	28	Craftsman	Servant	80	80	DeathObserved	1
44	district_6	F	FALSE	243	NA	24	NA	Servant	80	80	DeathObserved	1
45	district_6	M	TRUE	249	26	22	Craftsman	Craftswoman	97	97	DeathObserved	1
46	district_6	M	TRUE	243	29	27	Employee	Housewife	86	86	DeathObserved	1
47	district_6	M	FALSE	250	NA	31	NA	Employee	60	60	DeathObserved	1
48	district_6	M	TRUE	242	31	20	Employee	Worker	77	77	DeathObserved	1
49	district_6	F	TRUE	260	26	23	Craftsman	Craftswoman	NA	NA	DeathBefore31	0
50	district_6	F	TRUE	267	30	29	Worker	Craftswoman	50	50	DeathObserved	1
51	district_6	F	TRUE	256	53	37	Craftsman	Housewife	92	92	DeathObserved	1
52	district_6	F	TRUE	337	28	34	Craftsman	Craftswoman	NA	NA	DeathBefore31	0
53	district_6	M	TRUE	351	26	22	Worker	Worker	79	79	DeathObserved	1
54	district_6	F	TRUE	440	32	27	Shopkeeper	Housewife	NA	NA	DeathBefore31	0
55	district_6	M	TRUE	477	26	25	Craftsman	Housewife	76	76	DeathObserved	1
56	district_6	M	TRUE	484	28	24	Middle class	UpperMiddleClass	NA	NA	DeathBefore31	0
57	district_6	M	TRUE	485	28	19	Shopkeeper	Worker	62	62	DeathObserved	1
58	district_6	F	TRUE	580	30	28	Craftsman	Worker	92	92	DeathObserved	1
59	district_6	M	TRUE	627	38	28	Middle class	Housewife	72	72	DeathObserved	1
60	district_6	F	TRUE	691	29	23	Shopkeeper	Shopkeeper	76	76	DeathObserved	1
61	district_6	F	TRUE	667	44	40	Worker	Housewife	74	74	DeathObserved	1
62	district_6	F	TRUE	769	48	38	Craftsman	Housewife	68	68	DeathObserved	1
63	district_6	F	TRUE	780	37	25	Craftsman	Craftswoman	NA	NA	DeathBefore31	0
64	district_6	F	FALSE	816	33	31	NA	Shopkeeper	60	60	DeathObserved	1
65	district_6	F	TRUE	842	29	25	Worker	Housewife	74	74	DeathObserved	1
66	district_6	F	TRUE	860	36	29	Worker	Housewife	46	46	DeathObserved	1
260	district_5	M	TRUE	2	29	31	Shopkeeper	Housekeeper	82	82	DeathObserved	1
261	district_5	M	TRUE	9	25	24	Craftsman	Worker	NA	NA	DeathBefore31	0
262	district_5	F	FALSE	12	NA	20	NA	Servant	NA	NA	DeathBefore31	0
263	district_5	F	TRUE	7	37	39	Employee	Employee	74	74	DeathObserved	1
264	district_5	F	FALSE	13	NA	23	NA	Servant	NA	NA	DeathBefore31	0
265	district_5	M	TRUE	12	19	22	Craftsman	Craftswoman	98	98	DeathObserved	1
266	district_5	M	TRUE	19	29	31	Shopkeeper	Shopkeeper	88	88	DeathObserved	1
267	district_5	M	TRUE	20	27	20	Worker	Housekeeper	63	63	DeathObserved	1
268	district_5	F	TRUE	21	21	20	Worker	Craftswoman	53	53	DeathObserved	1
269	district_5	F	TRUE	22	28	26	Worker	Worker	87	87	DeathObserved	1
270	district_5	M	TRUE	24	24	22	Craftsman	Craftswoman	76	76	DeathObserved	1
271	district_5	F	TRUE	26	39	40	Shopkeeper	Housewife	71	71	DeathObserved	1
272	district_5	F	TRUE	18	29	28	Worker	Worker	84	84	DeathObserved	1
273	district_5	F	TRUE	17	31	30	Middle class	Housewife	92	92	DeathObserved	1
274	district_5	M	TRUE	28	41	35	Worker	Housekeeper	69	69	DeathObserved	1
275	district_5	F	FALSE	34	NA	22	NA	Servant	50	50	DeathObserved	1
276	district_5	M	FALSE	34	NA	34	NA	Servant	NA	NA	DeathBefore31	0
277	district_5	M	TRUE	32	33	25	Craftsman	Housekeeper	73	73	DeathObserved	1
278	district_5	M	TRUE	26	25	23	Employee	Worker	58	58	DeathObserved	1
279	district_5	F	TRUE	35	31	29	Worker	Housekeeper	NA	NA	DeathBefore31	0
280	district_5	M	TRUE	35	34	24	Employee	Worker	81	81	DeathObserved	1
281	district_5	M	TRUE	37	32	24	Employee	NA	85	85	DeathObserved	1
282	district_5	F	TRUE	39	30	22	Upper class	Housewife	71	71	DeathObserved	1
283	district_5	F	TRUE	46	41	35	Middle class	Housekeeper	96	96	DeathObserved	1
284	district_5	F	FALSE	49	NA	26	NA	Housekeeper	96	96	DeathObserved	1
285	district_5	M	TRUE	57	31	29	Worker	Housekeeper	89	89	DeathObserved	1
286	district_5	F	TRUE	56	36	33	Craftsman	Housekeeper	79	79	DeathObserved	1
287	district_5	M	TRUE	54	26	20	Craftsman	Employee	82	82	DeathObserved	1
288	district_5	F	TRUE	67	29	22	Craftsman	Craftswoman	88	88	DeathObserved	1
289	district_5	M	TRUE	57	34	31	Employee	Craftswoman	67	67	DeathObserved	1
290	district_5	F	TRUE	70	25	19	Worker	Craftswoman	75	75	DeathObserved	1
291	district_5	F	TRUE	77	65	33	Employee	Housekeeper	NA	101	Alive99	1
292	district_5	M	TRUE	77	25	19	Upper class	Employee	47	47	DeathObserved	1
293	district_5	F	FALSE	71	NA	18	NA	Craftswoman	NA	NA	DeathBefore31	0
294	district_5	M	TRUE	81	26	23	Worker	Housekeeper	NA	NA	DeathBefore31	0
295	district_5	M	TRUE	81	31	35	Craftsman	Craftswoman	94	94	DeathObserved	1
296	district_5	F	TRUE	69	22	23	Worker	Craftswoman	94	94	DeathObserved	1
297	district_5	M	TRUE	82	24	21	Worker	Worker	NA	NA	DeathBefore31	0
298	district_5	M	TRUE	84	26	25	Worker	Worker	55	55	DeathObserved	1
299	district_5	F	TRUE	83	41	24	Employee	Housewife	93	93	DeathObserved	1
300	district_5	F	TRUE	81	42	27	Employee	Housekeeper	85	85	DeathObserved	1
301	district_5	M	TRUE	85	36	33	Worker	Shopkeeper	NA	NA	DeathBefore31	0
302	district_5	M	FALSE	94	NA	25	NA	Servant	96	96	DeathObserved	1
303	district_5	M	TRUE	95	28	19	Employee	Servant	NA	NA	DeathBefore31	0
304	district_5	F	TRUE	93	31	28	Employee	Servant	82	82	DeathObserved	1
305	district_5	F	TRUE	97	28	22	Worker	Housekeeper	NA	NA	DeathBefore31	0
306	district_5	M	TRUE	96	33	27	Worker	Housekeeper	92	92	DeathObserved	1
307	district_5	M	TRUE	95	36	27	Craftsman	Craftswoman	65	65	DeathObserved	1
308	district_5	M	FALSE	107	NA	19	NA	Employee	NA	NA	DeathBefore31	0
309	district_5	F	TRUE	109	26	22	Craftsman	Employee	NA	NA	DeathBefore31	0
310	district_5	F	TRUE	108	38	32	Worker	Housekeeper	97	97	DeathObserved	1
311	district_5	F	TRUE	111	33	25	Employee	Housewife	NA	NA	DeathBefore31	0
312	district_5	M	TRUE	116	29	26	Craftsman	Housewife	86	86	DeathObserved	1
313	district_5	F	TRUE	109	32	35	Employee	Servant	53	53	DeathObserved	1
314	district_5	M	FALSE	124	NA	24	NA	Servant	74	74	DeathObserved	1
315	district_5	M	TRUE	124	32	30	Worker	Housekeeper	NA	NA	DeathBefore31	0
316	district_5	F	TRUE	124	39	39	Worker	Housekeeper	40	40	DeathObserved	1
317	district_5	M	TRUE	133	33	27	Worker	Craftswoman	81	81	DeathObserved	1
318	district_5	F	FALSE	135	NA	21	NA	Employee	NA	NA	DeathBefore31	0
319	district_5	M	FALSE	136	NA	21	NA	Shopkeeper	69	69	DeathObserved	1
320	district_5	M	TRUE	134	40	27	Worker	Shopkeeper	90	90	DeathObserved	1
321	district_5	F	TRUE	142	34	29	Upper class	Housewife	70	70	DeathObserved	1
322	district_5	F	TRUE	142	24	24	Upper class	UpperMiddleClass	NA	NA	DeathBefore31	0
323	district_5	F	TRUE	141	40	32	Employee	Servant	61	61	DeathObserved	1
324	district_5	F	TRUE	146	25	27	Craftsman	Craftswoman	NA	NA	DeathBefore31	0
325	district_5	M	TRUE	142	26	22	Employee	Housewife	NA	NA	DeathBefore31	0
326	district_5	M	TRUE	140	25	21	Employee	Employee	NA	NA	DeathBefore31	0
327	district_5	M	FALSE	148	NA	26	NA	Housekeeper	NA	NA	DeathBefore31	0
328	district_5	F	TRUE	149	31	29	Worker	Housekeeper	NA	NA	DeathBefore31	0
329	district_5	M	TRUE	154	28	20	Craftsman	Housewife	NA	NA	DeathBefore31	0
330	district_5	M	TRUE	153	27	22	Employee	Employee	93	93	DeathObserved	1
331	district_5	M	FALSE	154	NA	21	NA	Worker	NA	NA	DeathBefore31	0
332	district_5	F	TRUE	161	39	29	Middle class	Housewife	80	80	DeathObserved	1
333	district_5	F	TRUE	162	26	23	Craftsman	Employee	97	97	DeathObserved	1
334	district_5	F	TRUE	162	29	30	Employee	Craftswoman	NA	NA	DeathBefore31	0
335	district_5	F	TRUE	170	23	21	Worker	Worker	93	93	DeathObserved	1
336	district_5	M	TRUE	170	29	18	Craftsman	Housewife	96	96	DeathObserved	1
337	district_5	F	TRUE	171	39	27	Craftsman	Craftswoman	90	90	DeathObserved	1
338	district_5	F	TRUE	171	19	21	Worker	Servant	NA	NA	DeathBefore31	0
339	district_5	M	TRUE	175	33	33	Worker	Housekeeper	80	80	DeathObserved	1
340	district_5	F	FALSE	175	NA	26	NA	Servant	93	93	DeathObserved	1
341	district_5	F	TRUE	176	31	31	Worker	Housekeeper	NA	NA	DeathBefore31	0
342	district_5	F	TRUE	178	31	24	Upper class	Housewife	87	87	DeathObserved	1
343	district_5	M	TRUE	181	25	19	Worker	Servant	NA	NA	DeathBefore31	0
344	district_5	M	FALSE	180	NA	23	NA	Craftswoman	NA	NA	DeathBefore31	0
345	district_5	F	TRUE	181	44	20	Upper class	Worker	75	75	DeathObserved	1
346	district_5	F	TRUE	184	23	26	Craftsman	Housewife	NA	NA	DeathBefore31	0
347	district_5	M	TRUE	191	22	23	Craftsman	Worker	NA	NA	DeathBefore31	0
348	district_5	M	TRUE	193	29	28	Craftsman	UpperMiddleClass	NA	NA	DeathBefore31	0
349	district_5	M	TRUE	193	28	25	Worker	Housekeeper	NA	NA	DeathBefore31	0
350	district_5	F	FALSE	191	NA	23	NA	Worker	58	58	DeathObserved	1
351	district_5	M	TRUE	191	29	20	Employee	Housekeeper	NA	NA	DeathBefore31	0
352	district_5	F	TRUE	187	36	32	Shopkeeper	Shopkeeper	NA	101	Alive99	1
353	district_5	M	TRUE	197	38	30	Upper class	Housewife	96	96	DeathObserved	1
354	district_5	F	TRUE	200	25	19	Worker	Craftswoman	87	87	DeathObserved	1
355	district_5	M	FALSE	201	NA	29	NA	UpperMiddleClass	83	83	DeathObserved	1
356	district_5	M	TRUE	200	27	23	Employee	Housekeeper	60	60	DeathObserved	1
357	district_5	F	FALSE	201	NA	20	NA	Servant	74	74	DeathObserved	1
358	district_5	M	TRUE	199	32	34	Worker	Housewife	NA	NA	DeathBefore31	0
359	district_5	F	TRUE	205	30	23	Craftsman	Servant	77	77	DeathObserved	1
360	district_5	F	TRUE	206	23	22	Worker	Craftswoman	79	79	DeathObserved	1
361	district_5	M	TRUE	211	32	28	Employee	Servant	75	75	DeathObserved	1
362	district_5	F	TRUE	208	32	26	Employee	Housekeeper	89	89	DeathObserved	1
363	district_5	M	TRUE	211	33	32	Worker	Housekeeper	84	84	DeathObserved	1
364	district_5	F	TRUE	209	36	38	Craftsman	Servant	NA	101	Alive99	1
365	district_5	F	TRUE	216	30	23	Worker	Craftswoman	78	78	DeathObserved	1
366	district_5	F	TRUE	216	24	23	Worker	Worker	73	73	DeathObserved	1
367	district_5	M	TRUE	216	27	23	Worker	Craftswoman	NA	NA	DeathBefore31	0
368	district_5	M	TRUE	214	27	21	Shopkeeper	Shopkeeper	72	72	DeathObserved	1
369	district_5	F	TRUE	224	31	22	Employee	Servant	NA	NA	DeathBefore31	0
370	district_5	M	TRUE	223	29	23	Employee	Craftswoman	67	67	DeathObserved	1
371	district_5	F	TRUE	219	29	30	Middle class	Worker	73	73	DeathObserved	1
372	district_5	F	TRUE	223	38	33	Shopkeeper	Housekeeper	90	90	DeathObserved	1
373	district_5	M	TRUE	228	40	28	Worker	Housewife	53	53	DeathObserved	1
374	district_5	F	TRUE	225	24	24	Employee	Housewife	89	89	DeathObserved	1
375	district_5	F	TRUE	234	24	20	Worker	Housekeeper	NA	NA	DeathBefore31	0
376	district_5	F	TRUE	235	25	24	Craftsman	UpperMiddleClass	95	95	DeathObserved	1
377	district_5	M	TRUE	236	25	26	Employee	Employee	NA	101	Alive99	1
378	district_5	M	TRUE	237	26	20	Employee	Housewife	84	84	DeathObserved	1
379	district_5	M	TRUE	246	25	24	Shopkeeper	Craftswoman	72	72	DeathObserved	1
380	district_5	F	FALSE	248	NA	23	NA	Employee	65	65	DeathObserved	1
381	district_5	F	TRUE	245	28	26	Employee	Housekeeper	92	92	DeathObserved	1
382	district_5	M	FALSE	235	NA	31	NA	Craftswoman	78	78	DeathObserved	1
383	district_5	F	TRUE	243	30	20	Employee	Employee	NA	NA	DeathBefore31	0
384	district_5	M	TRUE	245	29	19	Worker	Housekeeper	70	70	DeathObserved	1
385	district_5	M	FALSE	249	NA	20	NA	Craftswoman	87	87	DeathObserved	1
386	district_5	M	TRUE	251	34	30	Middle class	Housewife	90	90	DeathObserved	1
387	district_5	M	FALSE	253	NA	19	NA	Craftswoman	89	89	DeathObserved	1
388	district_5	M	FALSE	256	NA	22	NA	Worker	64	64	DeathObserved	1
389	district_5	F	TRUE	246	35	24	Employee	Housekeeper	NA	NA	DeathBefore31	0
390	district_5	M	TRUE	254	31	30	Craftsman	Housewife	NA	NA	DeathBefore31	0
391	district_5	F	TRUE	256	22	16	Shopkeeper	Worker	NA	NA	DeathBefore31	0
392	district_5	M	FALSE	256	NA	19	NA	Servant	82	82	DeathObserved	1
393	district_5	M	FALSE	255	NA	21	NA	Craftswoman	NA	NA	DeathBefore31	0
394	district_5	F	FALSE	260	NA	23	NA	Servant	NA	NA	DeathBefore31	0
395	district_5	M	TRUE	260	30	28	Employee	Craftswoman	93	93	DeathObserved	1
396	district_5	F	FALSE	262	NA	32	NA	Servant	93	93	DeathObserved	1
397	district_5	M	TRUE	258	30	21	Worker	Housekeeper	NA	NA	DeathBefore31	0
398	district_5	F	FALSE	261	NA	32	NA	Worker	NA	NA	DeathBefore31	0
399	district_5	M	TRUE	267	31	23	Employee	Worker	48	48	DeathObserved	1
400	district_5	F	TRUE	267	25	21	Craftsman	Worker	NA	NA	DeathBefore31	0
401	district_5	M	TRUE	267	26	24	Shopkeeper	Housekeeper	64	64	DeathObserved	1
402	district_5	M	FALSE	282	NA	29	NA	Servant	62	62	DeathObserved	1
403	district_5	F	TRUE	283	30	26	Shopkeeper	Shopkeeper	NA	NA	DeathBefore31	0
404	district_5	F	TRUE	284	29	22	Craftsman	Craftswoman	81	81	DeathObserved	1
405	district_5	F	TRUE	284	29	29	Worker	Housewife	84	84	DeathObserved	1
406	district_5	M	TRUE	294	33	27	Middle class	Housewife	69	69	DeathObserved	1
407	district_5	F	FALSE	309	NA	21	NA	Worker	NA	NA	DeathBefore31	0
408	district_5	F	TRUE	307	36	26	Middle class	Housewife	95	95	DeathObserved	1
409	district_5	M	TRUE	311	30	32	Upper class	Housewife	92	92	DeathObserved	1
410	district_5	M	FALSE	321	NA	32	NA	Craftswoman	94	94	DeathObserved	1
411	district_5	M	TRUE	329	43	29	Upper class	Housewife	76	76	DeathObserved	1
412	district_5	M	TRUE	348	26	28	Worker	Worker	82	82	DeathObserved	1
413	district_5	F	TRUE	345	35	26	Employee	Servant	NA	NA	DeathBefore31	0
414	district_5	F	FALSE	370	NA	24	NA	Housekeeper	61	61	DeathObserved	1
415	district_5	F	TRUE	358	32	24	Upper class	Housewife	74	74	DeathObserved	1
416	district_5	F	TRUE	374	36	29	Worker	Housewife	72	72	DeathObserved	1
417	district_5	M	TRUE	386	38	25	Upper class	Housewife	91	91	DeathObserved	1
418	district_5	F	TRUE	383	24	23	Upper class	Housewife	94	94	DeathObserved	1
419	district_5	F	FALSE	398	NA	20	NA	Housekeeper	66	66	DeathObserved	1
420	district_5	F	TRUE	399	48	31	Craftsman	Craftswoman	97	97	DeathObserved	1
421	district_5	M	TRUE	444	35	32	Worker	Housekeeper	NA	NA	DeathBefore31	0
422	district_5	M	TRUE	453	30	27	Employee	Housewife	56	56	DeathObserved	1
423	district_5	F	TRUE	458	38	28	Employee	Craftswoman	NA	NA	DeathBefore31	0
424	district_5	F	TRUE	464	35	24	Upper class	Housewife	98	98	DeathObserved	1
425	district_5	F	TRUE	452	30	33	Employee	Craftswoman	86	86	DeathObserved	1
426	district_5	F	TRUE	470	34	26	Craftsman	Employee	86	86	DeathObserved	1
427	district_5	F	FALSE	471	NA	25	NA	Employee	90	90	DeathObserved	1
428	district_5	F	TRUE	468	49	38	Upper class	Shopkeeper	NA	NA	DeathBefore31	0
429	district_5	M	TRUE	524	35	29	Upper class	Housewife	86	86	DeathObserved	1
430	district_5	M	TRUE	540	29	23	Craftsman	Housewife	91	91	DeathObserved	1
431	district_5	M	TRUE	564	30	28	Worker	Craftswoman	97	97	DeathObserved	1
432	district_5	F	FALSE	562	NA	30	NA	Craftswoman	NA	NA	DeathBefore31	0
433	district_5	F	TRUE	571	32	26	Employee	Housekeeper	90	90	DeathObserved	1
434	district_5	M	TRUE	571	21	20	Craftsman	Craftswoman	NA	NA	DeathBefore31	0
435	district_5	M	FALSE	574	NA	22	NA	Housekeeper	90	90	DeathObserved	1
436	district_5	M	TRUE	575	40	26	Upper class	Housewife	NA	NA	DeathBefore31	0
437	district_5	F	FALSE	582	NA	25	NA	Worker	NA	NA	DeathBefore31	0
438	district_5	F	FALSE	583	NA	24	NA	Servant	NA	NA	DeathBefore31	0
439	district_5	M	TRUE	594	29	27	Craftsman	Housewife	76	76	DeathObserved	1
440	district_5	M	FALSE	585	NA	22	NA	Servant	82	82	DeathObserved	1
441	district_5	F	FALSE	616	NA	24	NA	Employee	75	75	DeathObserved	1
442	district_5	M	FALSE	614	NA	29	NA	Servant	NA	NA	DeathBefore31	0
443	district_5	M	TRUE	621	27	21	Middle class	Housewife	73	73	DeathObserved	1
444	district_5	M	TRUE	603	29	28	Employee	Housewife	55	55	DeathObserved	1
445	district_5	F	TRUE	629	42	33	Employee	Housewife	70	70	DeathObserved	1
446	district_5	M	TRUE	632	40	28	Employee	Housewife	NA	101	Alive99	1
447	district_5	M	FALSE	640	NA	22	NA	Craftswoman	72	72	DeathObserved	1
448	district_5	F	FALSE	647	NA	25	NA	Employee	69	69	DeathObserved	1
449	district_5	M	TRUE	650	33	29	Shopkeeper	Housewife	79	79	DeathObserved	1
450	district_5	F	TRUE	655	25	25	Craftsman	Employee	55	55	DeathObserved	1
451	district_5	M	TRUE	665	34	28	Worker	Shopkeeper	78	78	DeathObserved	1
452	district_5	M	TRUE	680	22	19	Worker	Housekeeper	NA	NA	DeathBefore31	0
453	district_5	F	TRUE	679	36	31	Employee	Housewife	56	56	DeathObserved	1
454	district_5	F	TRUE	683	25	22	Worker	Worker	NA	NA	DeathBefore31	0
455	district_5	F	TRUE	669	28	36	Employee	Housekeeper	69	69	DeathObserved	1
456	district_5	F	TRUE	679	38	30	Upper class	Housewife	68	68	DeathObserved	1
457	district_5	F	TRUE	697	26	32	Employee	Housekeeper	95	95	DeathObserved	1
458	district_5	M	TRUE	688	33	28	Worker	Craftswoman	86	86	DeathObserved	1
459	district_5	M	TRUE	696	36	34	Worker	Housekeeper	NA	NA	DeathBefore31	0
460	district_5	F	TRUE	711	29	24	Worker	Housekeeper	55	55	DeathObserved	1
461	district_5	M	TRUE	716	28	27	Worker	Worker	NA	NA	DeathBefore31	0
462	district_5	M	FALSE	727	NA	28	NA	Worker	NA	NA	DeathBefore31	0
463	district_5	M	TRUE	742	22	19	Worker	Housekeeper	NA	NA	DeathBefore31	0
464	district_5	M	FALSE	741	NA	19	NA	Housewife	81	81	DeathObserved	1
465	district_5	F	TRUE	752	29	23	Craftsman	Housekeeper	NA	NA	DeathBefore31	0
466	district_5	M	TRUE	763	35	27	Worker	Housekeeper	80	80	DeathObserved	1
467	district_5	M	TRUE	773	29	27	Employee	Servant	71	71	DeathObserved	1
468	district_5	M	TRUE	779	31	27	Upper class	Housewife	80	80	DeathObserved	1
469	district_5	F	FALSE	773	NA	20	NA	Worker	NA	NA	DeathBefore31	0
470	district_5	F	FALSE	785	NA	21	NA	Servant	NA	NA	DeathBefore31	0
471	district_5	F	TRUE	786	35	36	Worker	Housekeeper	NA	NA	DeathBefore31	0
472	district_5	M	FALSE	791	NA	25	NA	Servant	75	75	DeathObserved	1
473	district_5	M	FALSE	793	NA	22	NA	Servant	90	90	DeathObserved	1
474	district_5	M	TRUE	792	23	28	Worker	Housewife	81	81	DeathObserved	1
475	district_5	M	TRUE	799	31	23	Middle class	Servant	NA	101	Alive99	1
476	district_5	F	TRUE	804	41	35	Employee	Housewife	77	77	DeathObserved	1
477	district_5	F	TRUE	798	27	23	Worker	Housekeeper	NA	101	Alive99	1
478	district_5	F	FALSE	808	NA	26	NA	Craftswoman	88	88	DeathObserved	1
479	district_5	F	TRUE	810	31	24	Employee	Housewife	40	40	DeathObserved	1
480	district_5	M	FALSE	820	NA	26	NA	Housekeeper	NA	NA	DeathBefore31	0
481	district_5	F	TRUE	822	28	19	Craftsman	Worker	NA	NA	DeathBefore31	0
482	district_5	M	TRUE	824	40	32	Craftsman	Housekeeper	NA	NA	DeathBefore31	0
483	district_5	M	FALSE	795	NA	19	NA	Servant	66	66	DeathObserved	1
484	district_5	F	TRUE	829	38	28	Worker	Housekeeper	NA	NA	DeathBefore31	0
485	district_5	M	FALSE	834	NA	28	NA	Worker	NA	NA	DeathBefore31	0
486	district_5	M	FALSE	849	NA	25	NA	Worker	NA	NA	DeathBefore31	0
487	district_5	M	TRUE	865	27	23	Worker	Servant	80	80	DeathObserved	1
738	district_8	M	TRUE	-32	36	39	Shopkeeper	Housekeeper	91	91	DeathObserved	1
739	district_8	M	TRUE	-1	31	35	Worker	Employee	70	70	DeathObserved	1
740	district_8	M	FALSE	1	NA	28	NA	Employee	NA	NA	DeathBefore31	0
741	district_8	M	TRUE	3	33	30	Craftsman	Housewife	NA	NA	DeathBefore31	0
742	district_8	M	TRUE	6	27	25	Craftsman	Worker	NA	NA	DeathBefore31	0
743	district_8	F	TRUE	5	37	22	Shopkeeper	Shopkeeper	96	96	DeathObserved	1
744	district_8	M	TRUE	6	31	29	Craftsman	Housekeeper	71	71	DeathObserved	1
745	district_8	M	TRUE	8	27	22	Employee	Employee	NA	NA	DeathBefore31	0
746	district_8	M	TRUE	14	20	20	Craftsman	Craftswoman	87	87	DeathObserved	1
747	district_8	F	FALSE	16	NA	23	NA	Housekeeper	54	54	DeathObserved	1
748	district_8	F	TRUE	17	33	23	Upper class	Housewife	57	57	DeathObserved	1
749	district_8	F	TRUE	17	39	34	Worker	Housekeeper	NA	NA	DeathBefore31	0
750	district_8	M	TRUE	20	27	27	Employee	Housewife	58	58	DeathObserved	1
751	district_8	M	TRUE	22	26	27	Worker	Worker	83	83	DeathObserved	1
752	district_8	M	TRUE	23	33	25	Craftsman	Craftswoman	NA	NA	DeathBefore31	0
753	district_8	M	FALSE	23	NA	23	NA	Worker	NA	NA	DeathBefore31	0
754	district_8	F	FALSE	24	NA	22	NA	Employee	98	98	DeathObserved	1
755	district_8	M	TRUE	24	25	26	Craftsman	Worker	77	77	DeathObserved	1
756	district_8	F	FALSE	28	NA	34	NA	Servant	89	89	DeathObserved	1
757	district_8	M	TRUE	29	26	19	Employee	Shopkeeper	NA	NA	DeathBefore31	0
758	district_8	F	TRUE	28	37	32	Upper class	Housewife	91	91	DeathObserved	1
759	district_8	M	TRUE	31	24	21	Craftsman	Craftswoman	85	85	DeathObserved	1
760	district_8	M	TRUE	29	28	22	Employee	Worker	NA	101	Alive99	1
761	district_8	F	TRUE	32	29	25	Employee	Employee	90	90	DeathObserved	1
762	district_8	M	TRUE	34	50	28	Upper class	Housekeeper	73	73	DeathObserved	1
763	district_8	M	FALSE	31	NA	25	NA	Craftswoman	55	55	DeathObserved	1
764	district_8	F	TRUE	35	25	22	Employee	Housewife	46	46	DeathObserved	1
765	district_8	M	TRUE	35	27	23	Employee	Housekeeper	79	79	DeathObserved	1
766	district_8	M	TRUE	38	34	30	Employee	Housekeeper	NA	NA	DeathBefore31	0
767	district_8	F	TRUE	38	32	28	Middle class	Housewife	90	90	DeathObserved	1
768	district_8	M	TRUE	41	27	32	Craftsman	Craftswoman	85	85	DeathObserved	1
769	district_8	M	FALSE	42	NA	24	NA	Employee	NA	NA	DeathBefore31	0
770	district_8	F	TRUE	42	25	21	Craftsman	Housewife	92	92	DeathObserved	1
771	district_8	M	FALSE	47	NA	36	NA	Servant	NA	NA	DeathBefore31	0
772	district_8	M	FALSE	48	NA	20	NA	Servant	NA	NA	DeathBefore31	0
773	district_8	M	TRUE	47	33	32	Employee	Housekeeper	NA	NA	DeathBefore31	0
774	district_8	M	FALSE	53	NA	26	NA	Employee	NA	NA	DeathBefore31	0
775	district_8	F	TRUE	53	27	24	Worker	Housekeeper	NA	NA	DeathBefore31	0
776	district_8	F	FALSE	54	NA	18	NA	Employee	NA	NA	DeathBefore31	0
777	district_8	F	TRUE	50	41	28	Upper class	Housewife	NA	NA	DeathBefore31	0
778	district_8	F	FALSE	50	NA	26	NA	UpperMiddleClass	NA	NA	DeathBefore31	0
779	district_8	M	TRUE	57	29	26	Employee	Housewife	82	82	DeathObserved	1
780	district_8	F	TRUE	57	30	25	Employee	Housekeeper	80	80	DeathObserved	1
781	district_8	M	TRUE	57	39	31	Employee	Craftswoman	85	85	DeathObserved	1
782	district_8	M	TRUE	60	36	28	Craftsman	Housekeeper	77	77	DeathObserved	1
783	district_8	M	TRUE	62	36	23	Worker	Housekeeper	NA	NA	DeathBefore31	0
784	district_8	F	TRUE	60	28	27	Craftsman	Worker	31	31	DeathObserved	1
785	district_8	F	TRUE	58	36	26	Craftsman	Worker	83	83	DeathObserved	1
786	district_8	F	TRUE	62	28	32	Employee	Housekeeper	NA	NA	DeathBefore31	0
787	district_8	F	FALSE	61	NA	21	NA	Shopkeeper	NA	NA	DeathBefore31	0
788	district_8	M	TRUE	64	39	29	Employee	Worker	94	94	DeathObserved	1
789	district_8	F	TRUE	63	29	22	Upper class	Housewife	81	81	DeathObserved	1
790	district_8	F	TRUE	70	24	31	Worker	Housekeeper	85	85	DeathObserved	1
791	district_8	M	TRUE	60	26	18	Employee	Craftswoman	NA	NA	DeathBefore31	0
792	district_8	M	TRUE	71	29	29	Worker	Housekeeper	NA	NA	DeathBefore31	0
793	district_8	M	TRUE	71	28	28	Employee	Craftswoman	81	81	DeathObserved	1
794	district_8	M	TRUE	70	48	32	Craftsman	Servant	NA	NA	DeathBefore31	0
795	district_8	F	TRUE	75	34	26	Worker	Housekeeper	73	73	DeathObserved	1
796	district_8	F	TRUE	79	25	23	Craftsman	Employee	80	80	DeathObserved	1
797	district_8	M	FALSE	80	NA	25	NA	Employee	33	33	DeathObserved	1
798	district_8	F	TRUE	78	30	22	Employee	Servant	84	84	DeathObserved	1
799	district_8	M	TRUE	80	28	31	Worker	Housewife	78	78	DeathObserved	1
800	district_8	M	FALSE	86	NA	24	NA	Housekeeper	85	85	DeathObserved	1
801	district_8	M	TRUE	86	26	26	Employee	Housekeeper	NA	NA	DeathBefore31	0
802	district_8	F	TRUE	85	35	36	Employee	Servant	93	93	DeathObserved	1
803	district_8	M	TRUE	69	47	41	Upper class	Housewife	80	80	DeathObserved	1
804	district_8	F	TRUE	93	27	23	Craftsman	Housewife	81	81	DeathObserved	1
805	district_8	F	FALSE	92	NA	25	NA	Servant	NA	NA	DeathBefore31	0
806	district_8	F	TRUE	95	30	30	Worker	Servant	NA	101	Alive99	1
807	district_8	F	TRUE	93	31	31	Shopkeeper	Shopkeeper	88	88	DeathObserved	1
808	district_8	F	TRUE	100	29	23	Upper class	Housewife	92	92	DeathObserved	1
809	district_8	M	TRUE	104	28	31	Employee	Servant	NA	NA	DeathBefore31	0
810	district_8	F	TRUE	105	26	27	Worker	Servant	NA	NA	DeathBefore31	0
811	district_8	M	TRUE	107	23	23	Worker	Housekeeper	75	75	DeathObserved	1
812	district_8	M	TRUE	109	39	34	Employee	Housekeeper	98	98	DeathObserved	1
813	district_8	M	TRUE	109	31	28	Craftsman	Worker	87	87	DeathObserved	1
814	district_8	F	FALSE	109	NA	24	NA	Craftswoman	NA	NA	DeathBefore31	0
815	district_8	F	TRUE	106	25	23	Worker	Housekeeper	93	93	DeathObserved	1
816	district_8	F	FALSE	113	NA	26	NA	Shopkeeper	36	36	DeathObserved	1
817	district_8	F	FALSE	114	NA	35	NA	Housekeeper	83	83	DeathObserved	1
818	district_8	M	TRUE	117	24	24	Employee	Housekeeper	NA	NA	DeathBefore31	0
819	district_8	M	TRUE	116	24	25	Employee	Servant	51	51	DeathObserved	1
820	district_8	F	FALSE	117	NA	21	NA	Shopkeeper	NA	101	Alive99	1
821	district_8	M	TRUE	118	37	38	Employee	Housekeeper	41	41	DeathObserved	1
822	district_8	M	TRUE	120	27	25	Middle class	UpperMiddleClass	69	69	DeathObserved	1
823	district_8	M	TRUE	104	44	38	Middle class	Housewife	NA	NA	DeathBefore31	0
824	district_8	F	TRUE	118	35	33	Employee	Servant	98	98	DeathObserved	1
825	district_8	M	TRUE	118	38	27	Upper class	Housewife	85	85	DeathObserved	1
826	district_8	M	TRUE	124	35	26	Employee	Shopkeeper	93	93	DeathObserved	1
827	district_8	F	TRUE	126	31	23	Worker	Housekeeper	NA	NA	DeathBefore31	0
828	district_8	M	TRUE	125	31	31	Employee	Housekeeper	69	69	DeathObserved	1
829	district_8	M	TRUE	127	28	28	Worker	Employee	82	82	DeathObserved	1
830	district_8	F	TRUE	129	33	27	Employee	Craftswoman	90	90	DeathObserved	1
831	district_8	M	FALSE	130	NA	30	NA	UpperMiddleClass	63	63	DeathObserved	1
832	district_8	M	TRUE	133	24	23	Worker	Housekeeper	NA	NA	DeathBefore31	0
833	district_8	F	FALSE	127	NA	32	NA	Servant	87	87	DeathObserved	1
834	district_8	F	TRUE	136	25	27	Craftsman	Housekeeper	75	75	DeathObserved	1
835	district_8	M	FALSE	131	NA	19	NA	Servant	73	73	DeathObserved	1
836	district_8	M	FALSE	142	NA	18	NA	Worker	NA	NA	DeathBefore31	0
837	district_8	F	TRUE	117	29	38	Worker	Worker	58	58	DeathObserved	1
838	district_8	F	TRUE	140	32	24	Employee	Housekeeper	86	86	DeathObserved	1
839	district_8	F	FALSE	140	NA	19	NA	Servant	NA	NA	DeathBefore31	0
840	district_8	M	FALSE	143	NA	22	NA	Housewife	NA	NA	DeathBefore31	0
841	district_8	F	TRUE	144	32	28	Upper class	Housewife	71	71	DeathObserved	1
842	district_8	M	TRUE	144	32	28	Upper class	Housewife	56	56	DeathObserved	1
843	district_8	F	TRUE	148	32	28	Employee	Housewife	76	76	DeathObserved	1
844	district_8	M	TRUE	156	28	28	Shopkeeper	Housekeeper	78	78	DeathObserved	1
845	district_8	M	FALSE	156	NA	32	NA	Servant	76	76	DeathObserved	1
846	district_8	F	TRUE	153	27	27	Craftsman	Housewife	98	98	DeathObserved	1
847	district_8	M	FALSE	157	NA	21	NA	Craftswoman	65	65	DeathObserved	1
848	district_8	M	TRUE	159	34	26	Employee	Housekeeper	NA	NA	DeathBefore31	0
849	district_8	M	FALSE	155	NA	30	NA	Housekeeper	85	85	DeathObserved	1
850	district_8	F	FALSE	159	NA	20	NA	Employee	NA	NA	DeathBefore31	0
851	district_8	M	TRUE	154	33	25	Shopkeeper	Shopkeeper	NA	NA	DeathBefore31	0
852	district_8	M	TRUE	163	27	25	Employee	Servant	NA	NA	DeathBefore31	0
853	district_8	M	TRUE	164	41	29	Worker	Housekeeper	NA	NA	DeathBefore31	0
854	district_8	F	TRUE	164	32	28	Upper class	Housewife	82	82	DeathObserved	1
855	district_8	M	FALSE	165	NA	19	NA	Servant	NA	NA	DeathBefore31	0
856	district_8	F	TRUE	169	27	25	Employee	Craftswoman	NA	NA	DeathBefore31	0
857	district_8	F	TRUE	168	29	24	Worker	Worker	78	78	DeathObserved	1
858	district_8	M	TRUE	170	27	22	Employee	Craftswoman	69	69	DeathObserved	1
859	district_8	F	TRUE	172	26	25	Employee	Craftswoman	94	94	DeathObserved	1
860	district_8	M	TRUE	175	26	22	Employee	Craftswoman	NA	NA	DeathBefore31	0
861	district_8	M	FALSE	169	NA	19	NA	Servant	NA	NA	DeathBefore31	0
862	district_8	F	TRUE	171	NA	19	Worker	Servant	NA	NA	DeathBefore31	0
863	district_8	M	TRUE	176	25	27	Craftsman	Craftswoman	70	70	DeathObserved	1
864	district_8	F	FALSE	177	NA	25	NA	Servant	NA	NA	DeathBefore31	0
865	district_8	F	TRUE	179	23	19	Worker	Housekeeper	84	84	DeathObserved	1
866	district_8	F	TRUE	180	29	23	Shopkeeper	Housekeeper	76	76	DeathObserved	1
867	district_8	F	TRUE	182	24	30	Employee	Craftswoman	92	92	DeathObserved	1
868	district_8	F	FALSE	185	NA	25	NA	Craftswoman	NA	NA	DeathBefore31	0
869	district_8	F	FALSE	185	NA	20	NA	Craftswoman	NA	NA	DeathBefore31	0
870	district_8	F	FALSE	188	NA	25	NA	Craftswoman	NA	NA	DeathBefore31	0
871	district_8	F	FALSE	186	NA	22	NA	Housekeeper	NA	NA	DeathBefore31	0
872	district_8	F	TRUE	189	30	31	Shopkeeper	Shopkeeper	74	74	DeathObserved	1
873	district_8	M	TRUE	191	35	29	Worker	Housekeeper	79	79	DeathObserved	1
874	district_8	F	FALSE	191	NA	25	NA	Housekeeper	70	70	DeathObserved	1
875	district_8	F	TRUE	193	30	28	Craftsman	UpperMiddleClass	94	94	DeathObserved	1
876	district_8	F	TRUE	195	33	35	Worker	Housewife	NA	NA	DeathBefore31	0
877	district_8	M	TRUE	194	37	27	Employee	Housewife	NA	NA	DeathBefore31	0
878	district_8	M	TRUE	195	27	23	Employee	Housekeeper	NA	NA	DeathBefore31	0
879	district_8	M	FALSE	197	NA	24	NA	Housekeeper	95	95	DeathObserved	1
880	district_8	M	TRUE	195	40	32	Shopkeeper	Shopkeeper	88	88	DeathObserved	1
881	district_8	F	FALSE	202	NA	27	NA	Servant	86	86	DeathObserved	1
882	district_8	M	FALSE	202	NA	25	NA	Servant	NA	NA	DeathBefore31	0
883	district_8	M	TRUE	203	24	20	Employee	Craftswoman	NA	NA	DeathBefore31	0
884	district_8	F	FALSE	202	NA	19	NA	Craftswoman	87	87	DeathObserved	1
885	district_8	F	TRUE	201	25	25	Employee	Servant	69	69	DeathObserved	1
886	district_8	F	FALSE	203	NA	37	NA	Housekeeper	70	70	DeathObserved	1
887	district_8	M	TRUE	206	31	31	Worker	Worker	NA	NA	DeathBefore31	0
888	district_8	M	TRUE	207	38	24	Worker	Servant	84	84	DeathObserved	1
889	district_8	F	FALSE	209	NA	26	NA	Craftswoman	92	92	DeathObserved	1
890	district_8	F	FALSE	210	NA	27	NA	Servant	84	84	DeathObserved	1
891	district_8	M	FALSE	210	NA	31	NA	Craftswoman	76	76	DeathObserved	1
892	district_8	F	TRUE	208	40	29	Worker	Housekeeper	NA	NA	DeathBefore31	0
893	district_8	F	TRUE	212	30	25	Employee	Housewife	NA	NA	DeathBefore31	0
894	district_8	F	TRUE	212	26	23	Employee	Servant	61	61	DeathObserved	1
895	district_8	M	TRUE	216	32	23	Worker	Worker	NA	NA	DeathBefore31	0
896	district_8	F	TRUE	220	31	27	Craftsman	Worker	NA	NA	DeathBefore31	0
897	district_8	F	TRUE	218	30	24	Employee	Housewife	83	83	DeathObserved	1
898	district_8	M	TRUE	222	19	18	Craftsman	Employee	79	79	DeathObserved	1
899	district_8	F	FALSE	222	NA	25	NA	Craftswoman	NA	NA	DeathBefore31	0
900	district_8	M	FALSE	221	NA	21	NA	Craftswoman	NA	NA	DeathBefore31	0
901	district_8	M	TRUE	222	48	34	Middle class	Craftswoman	44	44	DeathObserved	1
902	district_8	M	FALSE	224	NA	34	NA	Servant	NA	NA	DeathBefore31	0
903	district_8	F	TRUE	221	35	33	Worker	Housewife	75	75	DeathObserved	1
904	district_8	F	FALSE	227	NA	27	NA	Employee	NA	NA	DeathBefore31	0
905	district_8	M	FALSE	228	NA	33	NA	NA	NA	NA	DeathBefore31	0
906	district_8	M	TRUE	229	33	28	Employee	Housekeeper	85	85	DeathObserved	1
907	district_8	M	FALSE	230	NA	26	NA	Worker	NA	NA	DeathBefore31	0
908	district_8	M	TRUE	227	33	21	Craftsman	Craftswoman	NA	NA	DeathBefore31	0
909	district_8	F	TRUE	230	28	25	Employee	Housewife	NA	NA	DeathBefore31	0
910	district_8	M	TRUE	236	28	26	Worker	Housekeeper	NA	NA	DeathBefore31	0
911	district_8	F	FALSE	238	NA	22	NA	Housekeeper	90	90	DeathObserved	1
912	district_8	M	TRUE	239	24	19	Worker	Housewife	NA	NA	DeathBefore31	0
913	district_8	F	TRUE	237	37	26	Upper class	Housewife	94	94	DeathObserved	1
914	district_8	F	TRUE	239	24	20	Worker	Housekeeper	NA	NA	DeathBefore31	0
915	district_8	M	TRUE	241	35	29	Worker	Craftswoman	73	73	DeathObserved	1
916	district_8	F	TRUE	234	47	32	Upper class	Housewife	82	82	DeathObserved	1
917	district_8	F	TRUE	241	29	27	Craftsman	Employee	NA	101	Alive99	1
918	district_8	F	FALSE	237	NA	28	NA	Servant	NA	NA	DeathBefore31	0
919	district_8	F	TRUE	241	28	22	Shopkeeper	Housewife	94	94	DeathObserved	1
920	district_8	M	TRUE	241	20	22	Worker	Worker	68	68	DeathObserved	1
921	district_8	F	TRUE	238	34	37	Employee	Servant	70	70	DeathObserved	1
922	district_8	F	TRUE	237	26	21	Employee	Housekeeper	98	98	DeathObserved	1
923	district_8	F	TRUE	242	33	29	Upper class	Housewife	74	74	DeathObserved	1
924	district_8	F	FALSE	245	NA	24	NA	Craftswoman	NA	NA	DeathBefore31	0
925	district_8	M	TRUE	245	35	22	Shopkeeper	Shopkeeper	90	90	DeathObserved	1
926	district_8	M	TRUE	246	36	31	Worker	Employee	NA	NA	DeathBefore31	0
927	district_8	M	TRUE	245	34	34	Upper class	Housewife	45	45	DeathObserved	1
928	district_8	M	TRUE	248	27	26	Craftsman	Worker	66	66	DeathObserved	1
929	district_8	F	FALSE	248	NA	25	NA	Shopkeeper	NA	NA	DeathBefore31	0
930	district_8	F	TRUE	252	38	40	Worker	Housekeeper	86	86	DeathObserved	1
931	district_8	M	TRUE	255	31	30	Craftsman	Housekeeper	NA	NA	DeathBefore31	0
932	district_8	F	TRUE	257	29	22	Employee	Housewife	68	68	DeathObserved	1
933	district_8	M	TRUE	255	36	33	Shopkeeper	Shopkeeper	97	97	DeathObserved	1
934	district_8	F	TRUE	255	26	21	Worker	Housewife	60	60	DeathObserved	1
935	district_8	F	FALSE	261	NA	21	NA	Worker	NA	NA	DeathBefore31	0
936	district_8	F	TRUE	266	21	21	Craftsman	Housekeeper	92	92	DeathObserved	1
937	district_8	M	FALSE	268	NA	21	NA	Employee	53	53	DeathObserved	1
938	district_8	M	TRUE	270	25	31	Worker	Housekeeper	74	74	DeathObserved	1
939	district_8	F	TRUE	278	20	19	Craftsman	Craftswoman	91	91	DeathObserved	1
940	district_8	M	TRUE	282	29	31	Employee	Housekeeper	87	87	DeathObserved	1
941	district_8	M	FALSE	285	NA	37	NA	Housekeeper	42	42	DeathObserved	1
942	district_8	F	TRUE	289	34	25	Craftsman	Housewife	NA	NA	DeathBefore31	0
943	district_8	F	TRUE	290	21	23	Employee	Employee	84	84	DeathObserved	1
944	district_8	M	TRUE	295	27	25	Shopkeeper	Housewife	NA	NA	DeathBefore31	0
945	district_8	M	TRUE	295	29	29	Worker	Shopkeeper	76	76	DeathObserved	1
946	district_8	M	TRUE	293	27	23	Worker	Housewife	98	98	DeathObserved	1
947	district_8	M	TRUE	299	31	24	Employee	Housewife	56	56	DeathObserved	1
948	district_8	M	TRUE	293	36	33	Craftsman	Worker	88	88	DeathObserved	1
949	district_8	F	TRUE	281	63	41	Upper class	Housewife	88	88	DeathObserved	1
950	district_8	M	TRUE	306	39	23	Craftsman	Craftswoman	NA	NA	DeathBefore31	0
951	district_8	M	FALSE	313	NA	23	NA	Employee	91	91	DeathObserved	1
952	district_8	M	TRUE	312	45	39	Middle class	Worker	87	87	DeathObserved	1
953	district_8	M	FALSE	317	NA	24	NA	Servant	86	86	DeathObserved	1
954	district_8	F	TRUE	321	50	27	Employee	Servant	74	74	DeathObserved	1
955	district_8	M	TRUE	322	34	27	Worker	Craftswoman	NA	NA	DeathBefore31	0
956	district_8	F	TRUE	323	41	26	Middle class	Housewife	84	84	DeathObserved	1
957	district_8	F	TRUE	328	27	26	Craftsman	Worker	NA	NA	DeathBefore31	0
958	district_8	F	TRUE	327	40	26	Worker	Craftswoman	NA	NA	DeathBefore31	0
959	district_8	M	FALSE	329	NA	24	NA	Servant	64	64	DeathObserved	1
960	district_8	M	TRUE	330	31	31	Middle class	Housewife	87	87	DeathObserved	1
961	district_8	F	TRUE	348	37	28	Worker	Shopkeeper	68	68	DeathObserved	1
962	district_8	F	TRUE	353	24	24	Employee	Employee	NA	NA	DeathBefore31	0
963	district_8	M	FALSE	356	NA	22	NA	Servant	NA	NA	DeathBefore31	0
964	district_8	F	FALSE	360	NA	16	NA	Shopkeeper	90	90	DeathObserved	1
965	district_8	F	TRUE	366	43	40	Employee	Worker	NA	NA	DeathBefore31	0
966	district_8	M	TRUE	372	32	37	Employee	Housekeeper	88	88	DeathObserved	1
967	district_8	F	FALSE	374	NA	24	NA	Servant	NA	NA	DeathBefore31	0
968	district_8	F	FALSE	379	NA	30	NA	Servant	NA	NA	DeathBefore31	0
969	district_8	M	TRUE	383	33	28	Worker	Shopkeeper	86	86	DeathObserved	1
970	district_8	F	TRUE	385	24	23	Craftsman	Housekeeper	NA	101	Alive99	1
971	district_8	M	FALSE	385	NA	28	NA	Servant	NA	NA	DeathBefore31	0
972	district_8	M	TRUE	383	40	42	Craftsman	Housewife	63	63	DeathObserved	1
973	district_8	F	TRUE	396	31	27	Craftsman	Housekeeper	46	46	DeathObserved	1
974	district_8	M	TRUE	403	27	22	Worker	Housekeeper	87	87	DeathObserved	1
975	district_8	M	TRUE	400	44	22	Upper class	Housewife	83	83	DeathObserved	1
976	district_8	F	TRUE	402	27	26	Shopkeeper	Servant	44	44	DeathObserved	1
977	district_8	F	TRUE	400	33	33	Upper class	Housewife	93	93	DeathObserved	1
978	district_8	M	TRUE	396	44	41	Employee	UpperMiddleClass	90	90	DeathObserved	1
979	district_8	M	FALSE	368	NA	38	NA	Employee	NA	NA	DeathBefore31	0
980	district_8	F	TRUE	390	51	41	Craftsman	Shopkeeper	96	96	DeathObserved	1
981	district_8	M	TRUE	410	28	26	Employee	Servant	76	76	DeathObserved	1
982	district_8	M	TRUE	406	33	33	Middle class	Craftswoman	75	75	DeathObserved	1
983	district_8	F	TRUE	414	28	24	Employee	Servant	93	93	DeathObserved	1
984	district_8	F	TRUE	419	26	25	Craftsman	Servant	98	98	DeathObserved	1
985	district_8	F	TRUE	420	29	26	Craftsman	Housekeeper	NA	NA	DeathBefore31	0
986	district_8	M	TRUE	435	32	29	Upper class	Housewife	87	87	DeathObserved	1
987	district_8	F	FALSE	437	NA	19	NA	Craftswoman	80	80	DeathObserved	1
988	district_8	F	TRUE	437	28	23	Employee	Housekeeper	NA	NA	DeathBefore31	0
989	district_8	F	TRUE	434	33	21	Shopkeeper	Housewife	NA	NA	DeathBefore31	0
990	district_8	F	FALSE	441	NA	24	NA	Servant	NA	NA	DeathBefore31	0
991	district_8	M	TRUE	443	32	31	Upper class	Housewife	NA	NA	DeathBefore31	0
992	district_8	F	TRUE	452	28	23	Shopkeeper	Employee	77	77	DeathObserved	1
993	district_8	M	TRUE	448	39	37	Employee	Housewife	95	95	DeathObserved	1
994	district_8	F	TRUE	455	52	39	Worker	Housekeeper	92	92	DeathObserved	1
995	district_8	F	TRUE	451	31	33	Worker	Servant	63	63	DeathObserved	1
996	district_8	M	TRUE	459	26	21	Worker	Servant	77	77	DeathObserved	1
997	district_8	F	TRUE	467	30	29	Worker	Housewife	NA	101	Alive99	1
998	district_8	M	TRUE	465	22	23	Middle class	UpperMiddleClass	77	77	DeathObserved	1
999	district_8	M	TRUE	466	32	31	Upper class	Housewife	66	66	DeathObserved	1
1000	district_8	M	TRUE	468	32	26	Shopkeeper	Servant	NA	NA	DeathBefore31	0
1001	district_8	M	FALSE	469	NA	21	NA	Housewife	93	93	DeathObserved	1
1002	district_8	M	FALSE	469	NA	21	NA	Servant	NA	NA	DeathBefore31	0
1003	district_8	F	TRUE	473	37	38	Employee	Housekeeper	92	92	DeathObserved	1
1004	district_8	F	FALSE	472	NA	30	NA	Worker	NA	NA	DeathBefore31	0
1005	district_8	F	TRUE	484	41	32	Upper class	Housewife	NA	NA	DeathBefore31	0
1006	district_8	M	TRUE	488	45	31	Employee	Housewife	NA	NA	DeathBefore31	0
1007	district_8	F	FALSE	490	NA	28	NA	Worker	NA	NA	DeathBefore31	0
1008	district_8	F	TRUE	491	34	30	Employee	Servant	81	81	DeathObserved	1
1009	district_8	F	TRUE	497	28	29	Worker	Housewife	92	92	DeathObserved	1
1010	district_8	F	TRUE	503	38	25	Craftsman	Housewife	85	85	DeathObserved	1
1011	district_8	F	TRUE	505	45	24	Employee	Worker	77	77	DeathObserved	1
1012	district_8	F	TRUE	508	32	31	Employee	Craftswoman	90	90	DeathObserved	1
1013	district_8	M	TRUE	507	31	31	Worker	Housewife	69	69	DeathObserved	1
1014	district_8	M	TRUE	511	27	27	Craftsman	Housekeeper	75	75	DeathObserved	1
1015	district_8	F	TRUE	523	28	24	Worker	Servant	NA	NA	DeathBefore31	0
1016	district_8	M	TRUE	534	34	27	Upper class	Housewife	62	62	DeathObserved	1
1017	district_8	F	FALSE	535	NA	26	NA	Servant	91	91	DeathObserved	1
1018	district_8	F	FALSE	537	NA	30	NA	Worker	NA	NA	DeathBefore31	0
1019	district_8	F	TRUE	537	27	21	Shopkeeper	Housewife	78	78	DeathObserved	1
1020	district_8	F	TRUE	544	31	32	Craftsman	Housekeeper	85	85	DeathObserved	1
1021	district_8	F	TRUE	543	30	24	Worker	Worker	96	96	DeathObserved	1
1022	district_8	F	TRUE	550	23	26	Worker	Craftswoman	NA	NA	DeathBefore31	0
1023	district_8	M	TRUE	555	34	29	Worker	Worker	NA	NA	DeathBefore31	0
1024	district_8	F	TRUE	564	28	25	Craftsman	Housewife	79	79	DeathObserved	1
1025	district_8	M	TRUE	562	32	27	Craftsman	Servant	65	65	DeathObserved	1
1026	district_8	F	TRUE	567	30	28	Employee	Servant	95	95	DeathObserved	1
1027	district_8	M	FALSE	570	NA	24	NA	Servant	NA	NA	DeathBefore31	0
1028	district_8	F	TRUE	571	49	30	Worker	Worker	NA	NA	DeathBefore31	0
1029	district_8	F	FALSE	578	NA	22	NA	Servant	83	83	DeathObserved	1
1030	district_8	M	TRUE	582	27	28	Employee	Housekeeper	56	56	DeathObserved	1
1031	district_8	M	TRUE	585	28	27	Employee	Housewife	83	83	DeathObserved	1
1032	district_8	F	TRUE	598	45	39	Upper class	Housewife	89	89	DeathObserved	1
1033	district_8	M	TRUE	600	24	20	Middle class	Housewife	67	67	DeathObserved	1
1034	district_8	M	TRUE	601	32	27	Upper class	Housewife	90	90	DeathObserved	1
1035	district_8	M	TRUE	606	30	23	Employee	Employee	91	91	DeathObserved	1
1036	district_8	M	TRUE	611	43	31	Middle class	Housewife	67	67	DeathObserved	1
1037	district_8	F	TRUE	610	34	31	Worker	Worker	68	68	DeathObserved	1
1038	district_8	F	FALSE	616	NA	22	NA	Housewife	NA	NA	DeathBefore31	0
1039	district_8	F	TRUE	616	45	35	Worker	Housewife	NA	NA	DeathBefore31	0
1040	district_8	F	TRUE	621	45	31	Worker	Housewife	NA	NA	DeathBefore31	0
1041	district_8	M	TRUE	634	30	24	Middle class	Housekeeper	71	71	DeathObserved	1
1042	district_8	F	FALSE	635	NA	22	NA	Housewife	NA	NA	DeathBefore31	0
1043	district_8	M	TRUE	638	26	21	Worker	Servant	NA	NA	DeathBefore31	0
1044	district_8	F	TRUE	638	21	22	Employee	Servant	87	87	DeathObserved	1
1045	district_8	M	TRUE	642	22	23	Employee	Shopkeeper	57	57	DeathObserved	1
1046	district_8	M	FALSE	643	NA	20	NA	Worker	NA	NA	DeathBefore31	0
1047	district_8	M	TRUE	641	37	26	Middle class	Housewife	80	80	DeathObserved	1
1048	district_8	F	FALSE	645	NA	20	NA	Housewife	57	57	DeathObserved	1
1049	district_8	M	FALSE	644	NA	26	NA	Shopkeeper	87	87	DeathObserved	1
1050	district_8	F	FALSE	645	NA	30	NA	Servant	NA	NA	DeathBefore31	0
1051	district_8	F	TRUE	646	33	22	Shopkeeper	Servant	95	95	DeathObserved	1
1052	district_8	F	TRUE	650	36	33	Upper class	Housewife	72	72	DeathObserved	1
1053	district_8	F	FALSE	667	NA	26	NA	Employee	83	83	DeathObserved	1
1054	district_8	M	TRUE	670	41	38	Worker	Housekeeper	NA	NA	DeathBefore31	0
1055	district_8	M	TRUE	670	27	30	Shopkeeper	Employee	NA	NA	DeathBefore31	0
1056	district_8	M	FALSE	675	NA	23	NA	Servant	78	78	DeathObserved	1
1057	district_8	M	TRUE	677	33	27	Employee	UpperMiddleClass	NA	NA	DeathBefore31	0
1058	district_8	F	TRUE	685	30	25	Middle class	Housewife	95	95	DeathObserved	1
1059	district_8	M	FALSE	684	NA	22	NA	Servant	NA	NA	DeathBefore31	0
1060	district_8	M	TRUE	684	27	24	Shopkeeper	Employee	82	82	DeathObserved	1
1061	district_8	F	TRUE	697	30	27	Craftsman	Craftswoman	76	76	DeathObserved	1
1062	district_8	M	TRUE	707	32	26	Upper class	Housewife	86	86	DeathObserved	1
1063	district_8	M	TRUE	707	21	24	Employee	Employee	68	68	DeathObserved	1
1064	district_8	F	TRUE	710	34	27	Craftsman	Housewife	NA	NA	DeathBefore31	0
1065	district_8	F	FALSE	714	NA	23	NA	Worker	NA	NA	DeathBefore31	0
1066	district_8	M	FALSE	713	NA	27	NA	Craftswoman	73	73	DeathObserved	1
1067	district_8	M	TRUE	722	32	29	Worker	Worker	94	94	DeathObserved	1
1068	district_8	F	FALSE	724	NA	24	NA	Craftswoman	79	79	DeathObserved	1
1069	district_8	M	TRUE	728	30	28	Shopkeeper	Servant	74	74	DeathObserved	1
1070	district_8	M	TRUE	730	30	35	Employee	Housewife	78	78	DeathObserved	1
1071	district_8	M	TRUE	742	36	36	Employee	Housekeeper	90	90	DeathObserved	1
1072	district_8	F	TRUE	748	48	35	Craftsman	Housekeeper	78	78	DeathObserved	1
1073	district_8	M	FALSE	749	NA	19	NA	Worker	NA	NA	DeathBefore31	0
1074	district_8	M	TRUE	752	31	27	Upper class	Housewife	85	85	DeathObserved	1
1075	district_8	M	TRUE	757	33	27	Upper class	Housewife	92	92	DeathObserved	1
1076	district_8	F	FALSE	758	NA	21	NA	Servant	75	75	DeathObserved	1
1077	district_8	M	TRUE	759	26	31	Employee	Craftswoman	NA	NA	DeathBefore31	0
1078	district_8	M	TRUE	763	29	27	Middle class	Housekeeper	NA	NA	DeathBefore31	0
1079	district_8	F	TRUE	767	42	34	Middle class	Housekeeper	81	81	DeathObserved	1
1080	district_8	F	TRUE	769	31	24	Middle class	Craftswoman	96	96	DeathObserved	1
1081	district_8	M	TRUE	766	42	38	Middle class	Housewife	83	83	DeathObserved	1
1082	district_8	M	TRUE	770	30	32	Employee	Housekeeper	68	68	DeathObserved	1
1083	district_8	M	TRUE	770	29	28	Craftsman	Servant	NA	NA	DeathBefore31	0
1084	district_8	F	FALSE	773	NA	25	NA	Employee	NA	NA	DeathBefore31	0
1085	district_8	M	TRUE	774	33	32	Employee	Worker	92	92	DeathObserved	1
1086	district_8	F	TRUE	778	32	29	Upper class	NA	NA	NA	DeathBefore31	0
1087	district_8	M	TRUE	785	40	32	Upper class	Housewife	89	89	DeathObserved	1
1088	district_8	F	FALSE	793	NA	29	NA	Housekeeper	83	83	DeathObserved	1
1089	district_8	F	TRUE	801	32	26	Employee	Servant	83	83	DeathObserved	1
1090	district_8	M	FALSE	802	NA	36	NA	Housewife	NA	NA	DeathBefore31	0
1091	district_8	F	TRUE	800	29	21	Worker	Employee	95	95	DeathObserved	1
1092	district_8	F	TRUE	813	37	27	Upper class	Craftswoman	80	80	DeathObserved	1
1093	district_8	M	TRUE	811	25	23	Worker	Craftswoman	66	66	DeathObserved	1
1094	district_8	M	FALSE	819	NA	26	NA	Shopkeeper	75	75	DeathObserved	1
1095	district_8	M	TRUE	821	31	24	Employee	Housewife	74	74	DeathObserved	1
1096	district_8	M	TRUE	817	36	29	Worker	Housekeeper	88	88	DeathObserved	1
1097	district_8	M	TRUE	830	32	30	Employee	Worker	77	77	DeathObserved	1
1098	district_8	M	TRUE	828	29	31	Craftsman	Housewife	44	44	DeathObserved	1
1099	district_8	M	TRUE	832	27	28	Worker	Housekeeper	77	77	DeathObserved	1
1100	district_8	M	TRUE	839	38	27	Employee	Craftswoman	NA	NA	DeathBefore31	0
1101	district_8	M	FALSE	843	NA	39	NA	Housekeeper	NA	NA	DeathBefore31	0
1102	district_8	M	TRUE	855	30	36	Employee	Housewife	80	80	DeathObserved	1
1103	district_8	M	FALSE	855	NA	27	NA	Servant	NA	NA	DeathBefore31	0
1104	district_8	F	FALSE	855	NA	39	NA	Servant	NA	NA	DeathBefore31	0
1105	district_8	M	FALSE	857	NA	24	NA	Worker	NA	NA	DeathBefore31	0
1106	district_8	F	TRUE	860	32	28	Worker	Housekeeper	90	90	DeathObserved	1
1107	district_8	F	TRUE	867	28	26	Employee	UpperMiddleClass	96	96	DeathObserved	1
1108	district_8	M	TRUE	866	42	28	Upper class	Housewife	NA	NA	DeathBefore31	0
1109	district_8	F	FALSE	865	NA	31	NA	Worker	50	50	DeathObserved	1
1110	district_8	M	TRUE	865	26	19	Worker	Shopkeeper	79	79	DeathObserved	1
1111	district_8	M	TRUE	870	31	26	Worker	Housekeeper	47	47	DeathObserved	1
1112	district_8	M	FALSE	874	NA	30	NA	Employee	NA	NA	DeathBefore31	0
1113	district_8	M	FALSE	876	NA	20	NA	Employee	NA	NA	DeathBefore31	0
1114	district_8	M	FALSE	876	NA	26	NA	Employee	95	95	DeathObserved	1
1115	district_7	M	TRUE	-1	29	31	Employee	Housewife	83	83	DeathObserved	1
1116	district_7	M	TRUE	15	34	24	Employee	Craftswoman	64	64	DeathObserved	1
1117	district_7	F	TRUE	21	30	26	Employee	Shopkeeper	NA	NA	DeathBefore31	0
1118	district_7	F	TRUE	16	41	30	Upper class	Housewife	89	89	DeathObserved	1
1119	district_7	M	TRUE	-44	35	20	Employee	Housewife	NA	NA	DeathBefore31	0
1120	district_7	F	TRUE	30	33	31	Upper class	Housewife	98	98	DeathObserved	1
1121	district_7	M	TRUE	16	32	35	Worker	Housekeeper	58	58	DeathObserved	1
1122	district_7	F	TRUE	34	35	35	Worker	Worker	84	84	DeathObserved	1
1123	district_7	F	FALSE	36	NA	20	NA	Craftswoman	37	37	DeathObserved	1
1124	district_7	M	TRUE	30	29	30	Worker	Housewife	85	85	DeathObserved	1
1125	district_7	M	TRUE	39	45	34	Employee	Housewife	95	95	DeathObserved	1
1126	district_7	M	TRUE	55	22	25	Upper class	Housewife	56	56	DeathObserved	1
1127	district_7	M	TRUE	64	26	22	Shopkeeper	Shopkeeper	86	86	DeathObserved	1
1128	district_7	M	TRUE	77	27	24	Middle class	Housewife	NA	101	Alive99	1
1129	district_7	F	TRUE	72	37	35	Shopkeeper	Housewife	72	72	DeathObserved	1
1130	district_7	F	TRUE	84	27	23	Shopkeeper	Housewife	96	96	DeathObserved	1
1131	district_7	M	TRUE	43	21	21	Shopkeeper	Employee	NA	NA	DeathBefore31	0
1132	district_7	F	TRUE	90	35	32	Shopkeeper	Craftswoman	89	89	DeathObserved	1
1133	district_7	M	TRUE	80	29	34	Employee	Housewife	NA	NA	DeathBefore31	0
1134	district_7	F	FALSE	95	NA	29	NA	Housewife	NA	NA	DeathBefore31	0
1135	district_7	M	TRUE	110	29	28	Upper class	Housewife	NA	NA	DeathBefore31	0
1136	district_7	F	TRUE	112	36	26	Upper class	Housewife	54	54	DeathObserved	1
1137	district_7	F	TRUE	127	28	29	Shopkeeper	Shopkeeper	83	83	DeathObserved	1
1138	district_7	F	TRUE	134	47	34	Worker	Housekeeper	89	89	DeathObserved	1
1139	district_7	M	TRUE	145	43	37	Upper class	Housewife	79	79	DeathObserved	1
1140	district_7	M	TRUE	150	20	19	Employee	Housewife	35	35	DeathObserved	1
1141	district_7	M	TRUE	152	43	39	Craftsman	Housewife	76	76	DeathObserved	1
1142	district_7	M	TRUE	148	27	23	Upper class	Housewife	NA	NA	DeathBefore31	0
1143	district_7	F	TRUE	169	22	18	Employee	Housewife	82	82	DeathObserved	1
1144	district_7	M	TRUE	176	27	22	Worker	Housewife	70	70	DeathObserved	1
1145	district_7	F	TRUE	178	33	26	Employee	Housewife	72	72	DeathObserved	1
1146	district_7	M	TRUE	191	34	30	Worker	Housewife	82	82	DeathObserved	1
1147	district_7	F	TRUE	192	29	23	Craftsman	Housewife	93	93	DeathObserved	1
1148	district_7	F	TRUE	197	35	21	Middle class	Housewife	98	98	DeathObserved	1
1149	district_7	F	TRUE	201	32	27	Shopkeeper	Shopkeeper	87	87	DeathObserved	1
1150	district_7	M	TRUE	195	25	21	Worker	Craftswoman	NA	NA	DeathBefore31	0
1151	district_7	M	TRUE	192	32	26	Employee	Housewife	51	51	DeathObserved	1
1152	district_7	M	TRUE	202	32	28	Employee	Employee	69	69	DeathObserved	1
1153	district_7	F	TRUE	220	27	22	Employee	Housewife	69	69	DeathObserved	1
1154	district_7	F	TRUE	232	30	27	Upper class	Housewife	83	83	DeathObserved	1
1155	district_7	M	TRUE	224	47	36	Upper class	Housewife	55	55	DeathObserved	1
1156	district_7	M	TRUE	229	33	27	Employee	Housewife	77	77	DeathObserved	1
1157	district_7	F	TRUE	239	33	31	Upper class	Housewife	92	92	DeathObserved	1
1158	district_7	F	TRUE	228	25	18	Employee	Housewife	86	86	DeathObserved	1
1159	district_7	M	TRUE	244	27	21	Middle class	Housewife	32	32	DeathObserved	1
1160	district_7	M	TRUE	246	34	32	Worker	Servant	73	73	DeathObserved	1
1161	district_7	F	TRUE	244	33	24	Upper class	Housewife	74	74	DeathObserved	1
1162	district_7	M	TRUE	243	30	26	Worker	Servant	85	85	DeathObserved	1
1163	district_7	M	TRUE	257	30	25	Craftsman	Servant	NA	NA	DeathBefore31	0
1164	district_7	M	TRUE	330	31	27	Upper class	Housewife	NA	NA	DeathBefore31	0
1165	district_7	M	TRUE	285	44	36	Upper class	Housewife	39	39	DeathObserved	1
1166	district_7	M	TRUE	382	38	32	Worker	Servant	59	59	DeathObserved	1
1167	district_7	F	TRUE	409	34	23	Upper class	Housewife	74	74	DeathObserved	1
1168	district_7	M	TRUE	439	41	32	Employee	Servant	NA	NA	DeathBefore31	0
1169	district_7	M	TRUE	427	36	36	Upper class	Housewife	33	33	DeathObserved	1
1170	district_7	F	TRUE	448	28	24	Upper class	Housewife	94	94	DeathObserved	1
1171	district_7	M	TRUE	489	31	23	Upper class	Housewife	NA	NA	DeathBefore31	0
1172	district_7	F	TRUE	493	49	33	Upper class	Housewife	86	86	DeathObserved	1
1173	district_7	F	TRUE	504	42	35	Upper class	Housewife	93	93	DeathObserved	1
1174	district_7	M	TRUE	548	25	25	Craftsman	Worker	NA	NA	DeathBefore31	0
1175	district_7	F	TRUE	568	29	24	Upper class	Housewife	83	83	DeathObserved	1
1176	district_7	F	TRUE	576	41	28	Worker	Housewife	71	71	DeathObserved	1
1177	district_7	F	TRUE	611	24	27	Worker	Worker	NA	NA	DeathBefore31	0
1178	district_7	F	TRUE	639	33	25	Upper class	Housewife	85	85	DeathObserved	1
1179	district_7	M	TRUE	689	26	27	Shopkeeper	Housewife	63	63	DeathObserved	1
1180	district_7	M	TRUE	731	35	24	Employee	Housewife	82	82	DeathObserved	1
1181	district_7	F	TRUE	749	43	38	Employee	Employee	98	98	DeathObserved	1
1182	district_7	M	TRUE	772	25	26	Employee	Housewife	89	89	DeathObserved	1
1183	district_7	M	TRUE	793	30	25	Employee	Housewife	86	86	DeathObserved	1
1184	district_7	M	TRUE	791	36	25	Employee	Housewife	NA	NA	DeathBefore31	0
1185	district_7	F	TRUE	808	33	30	Middle class	Housewife	90	90	DeathObserved	1
1186	district_7	F	TRUE	798	28	23	Shopkeeper	Shopkeeper	85	85	DeathObserved	1
1187	district_7	F	TRUE	826	26	22	Upper class	Housewife	94	94	DeathObserved	1
1188	district_7	M	TRUE	842	28	22	Worker	Housewife	75	75	DeathObserved	1
1189	district_7	F	TRUE	854	35	30	Upper class	Housewife	NA	NA	DeathBefore31	0
1253	district_2	M	TRUE	6	37	36	Worker	Housewife	94	94	DeathObserved	1
1254	district_2	M	TRUE	6	27	25	Employee	Housewife	NA	NA	DeathBefore31	0
1255	district_2	M	FALSE	10	NA	36	NA	Craftswoman	62	62	DeathObserved	1
1256	district_2	M	TRUE	12	30	29	Shopkeeper	Housewife	NA	NA	DeathBefore31	0
1257	district_2	M	TRUE	3	47	34	Worker	Servant	NA	NA	DeathBefore31	0
1258	district_2	M	TRUE	14	36	30	Upper class	Housewife	77	77	DeathObserved	1
1259	district_2	M	TRUE	16	35	27	Employee	Employee	71	71	DeathObserved	1
1260	district_2	M	TRUE	13	40	32	Upper class	Housewife	66	66	DeathObserved	1
1261	district_2	M	TRUE	13	27	22	Craftsman	Employee	NA	NA	DeathBefore31	0
1262	district_2	M	TRUE	20	28	24	Employee	Housewife	84	84	DeathObserved	1
1263	district_2	F	FALSE	21	NA	22	NA	Employee	79	79	DeathObserved	1
1264	district_2	M	FALSE	21	NA	29	NA	Housewife	92	92	DeathObserved	1
1265	district_2	F	FALSE	-9	NA	18	NA	Servant	NA	NA	DeathBefore31	0
1266	district_2	F	TRUE	21	33	28	Middle class	Housewife	NA	NA	DeathBefore31	0
1267	district_2	M	TRUE	23	26	24	Employee	Craftswoman	NA	NA	DeathBefore31	0
1268	district_2	F	FALSE	32	NA	19	NA	Servant	NA	NA	DeathBefore31	0
1269	district_2	M	TRUE	31	40	40	Middle class	Craftswoman	50	50	DeathObserved	1
1270	district_2	M	FALSE	40	NA	31	NA	Housewife	NA	NA	DeathBefore31	0
1271	district_2	F	TRUE	40	39	33	Craftsman	Housewife	50	50	DeathObserved	1
1272	district_2	F	FALSE	42	NA	25	NA	Employee	92	92	DeathObserved	1
1273	district_2	M	TRUE	42	30	25	Employee	Housewife	81	81	DeathObserved	1
1274	district_2	M	FALSE	46	NA	28	NA	Housewife	66	66	DeathObserved	1
1275	district_2	M	FALSE	33	NA	18	NA	Craftswoman	NA	NA	DeathBefore31	0
1276	district_2	F	FALSE	47	NA	27	NA	Servant	82	82	DeathObserved	1
1277	district_2	M	TRUE	50	31	26	Middle class	Housewife	98	98	DeathObserved	1
1278	district_2	F	TRUE	51	25	22	Employee	Employee	40	40	DeathObserved	1
1279	district_2	M	FALSE	56	NA	21	NA	Servant	NA	NA	DeathBefore31	0
1280	district_2	F	TRUE	65	29	23	Worker	Housewife	88	88	DeathObserved	1
1281	district_2	M	FALSE	69	NA	23	NA	Housewife	60	60	DeathObserved	1
1282	district_2	M	TRUE	68	33	31	Craftsman	Servant	NA	NA	DeathBefore31	0
1283	district_2	F	TRUE	73	26	25	Worker	Craftswoman	79	79	DeathObserved	1
1284	district_2	F	TRUE	70	28	24	Employee	Housewife	NA	NA	DeathBefore31	0
1285	district_2	M	FALSE	60	NA	36	NA	Servant	78	78	DeathObserved	1
1286	district_2	F	TRUE	79	26	21	Worker	Housewife	85	85	DeathObserved	1
1287	district_2	M	TRUE	61	39	39	Shopkeeper	Worker	89	89	DeathObserved	1
1288	district_2	F	TRUE	84	31	28	Craftsman	Housewife	NA	NA	DeathBefore31	0
1289	district_2	M	TRUE	90	35	19	Employee	Employee	93	93	DeathObserved	1
1290	district_2	M	FALSE	95	NA	26	NA	Shopkeeper	NA	NA	DeathBefore31	0
1291	district_2	F	TRUE	99	NA	22	Worker	Worker	75	75	DeathObserved	1
1292	district_2	M	TRUE	97	28	28	Employee	Housewife	77	77	DeathObserved	1
1293	district_2	F	FALSE	96	NA	21	NA	Craftswoman	87	87	DeathObserved	1
1294	district_2	M	TRUE	106	29	23	Worker	Employee	88	88	DeathObserved	1
1295	district_2	F	TRUE	96	26	19	Worker	Housewife	96	96	DeathObserved	1
1296	district_2	F	TRUE	107	28	22	Worker	Worker	NA	NA	DeathBefore31	0
1297	district_2	F	FALSE	108	NA	24	NA	Servant	NA	NA	DeathBefore31	0
1298	district_2	F	FALSE	119	NA	21	NA	Craftswoman	90	90	DeathObserved	1
1299	district_2	M	FALSE	116	NA	24	NA	Servant	60	60	DeathObserved	1
1300	district_2	M	FALSE	122	NA	20	NA	Housewife	82	82	DeathObserved	1
1301	district_2	M	FALSE	123	NA	26	NA	Housewife	69	69	DeathObserved	1
1302	district_2	F	FALSE	126	NA	39	NA	Craftswoman	77	77	DeathObserved	1
1303	district_2	M	TRUE	124	28	25	Shopkeeper	Craftswoman	92	92	DeathObserved	1
1304	district_2	F	TRUE	125	31	24	Upper class	Housewife	NA	101	Alive99	1
1305	district_2	M	TRUE	137	36	26	Upper class	Housewife	88	88	DeathObserved	1
1306	district_2	F	TRUE	135	27	22	Worker	Craftswoman	75	75	DeathObserved	1
1307	district_2	F	FALSE	138	NA	31	NA	Craftswoman	NA	NA	DeathBefore31	0
1308	district_2	F	TRUE	141	31	26	Worker	Housewife	NA	NA	DeathBefore31	0
1309	district_2	M	FALSE	141	NA	21	NA	Craftswoman	NA	NA	DeathBefore31	0
1310	district_2	F	FALSE	142	NA	32	NA	Housekeeper	71	71	DeathObserved	1
1311	district_2	M	TRUE	146	29	22	Upper class	Housewife	82	82	DeathObserved	1
1312	district_2	F	TRUE	144	27	20	Craftsman	Employee	93	93	DeathObserved	1
1313	district_2	M	TRUE	152	22	27	Worker	Employee	NA	NA	DeathBefore31	0
1314	district_2	F	TRUE	153	33	26	Shopkeeper	Housewife	74	74	DeathObserved	1
1315	district_2	M	TRUE	155	33	29	Employee	Servant	NA	NA	DeathBefore31	0
1316	district_2	F	TRUE	154	29	29	Craftsman	Housewife	NA	NA	DeathBefore31	0
1317	district_2	M	TRUE	161	27	26	Worker	Housewife	79	79	DeathObserved	1
1318	district_2	M	TRUE	170	35	32	Craftsman	Housewife	NA	NA	DeathBefore31	0
1319	district_2	M	FALSE	169	NA	22	NA	Employee	NA	NA	DeathBefore31	0
1320	district_2	M	FALSE	173	NA	26	NA	Housewife	57	57	DeathObserved	1
1321	district_2	F	TRUE	174	27	21	Upper class	Housewife	79	79	DeathObserved	1
1322	district_2	F	TRUE	174	35	32	Employee	Housewife	NA	NA	DeathBefore31	0
1323	district_2	F	TRUE	176	37	29	Upper class	Housewife	98	98	DeathObserved	1
1324	district_2	M	TRUE	178	32	27	Upper class	Housewife	72	72	DeathObserved	1
1325	district_2	M	TRUE	179	33	30	Worker	Housewife	63	63	DeathObserved	1
1326	district_2	M	TRUE	182	26	22	Worker	Servant	70	70	DeathObserved	1
1327	district_2	F	TRUE	184	25	33	Worker	Craftswoman	NA	NA	DeathBefore31	0
1328	district_2	F	FALSE	188	NA	28	NA	Employee	83	83	DeathObserved	1
1329	district_2	F	TRUE	189	28	22	Shopkeeper	Shopkeeper	92	92	DeathObserved	1
1330	district_2	F	TRUE	186	28	21	Craftsman	Craftswoman	NA	NA	DeathBefore31	0
1331	district_2	F	TRUE	196	27	21	Employee	Servant	NA	NA	DeathBefore31	0
1332	district_2	M	TRUE	197	24	21	Craftsman	Servant	NA	NA	DeathBefore31	0
1333	district_2	F	FALSE	197	NA	22	NA	Housekeeper	NA	NA	DeathBefore31	0
1334	district_2	F	FALSE	200	NA	21	NA	Housekeeper	84	84	DeathObserved	1
1335	district_2	M	TRUE	198	38	26	Upper class	Housewife	NA	NA	DeathBefore31	0
1336	district_2	M	TRUE	203	28	22	Employee	Housewife	NA	NA	DeathBefore31	0
1337	district_2	F	TRUE	205	25	28	Craftsman	Servant	53	53	DeathObserved	1
1338	district_2	F	TRUE	203	39	30	Middle class	Housewife	89	89	DeathObserved	1
1339	district_2	M	TRUE	207	27	24	Employee	Housewife	NA	NA	DeathBefore31	0
1340	district_2	F	TRUE	206	29	23	Employee	Servant	NA	NA	DeathBefore31	0
1341	district_2	F	TRUE	209	38	24	Worker	Housewife	81	81	DeathObserved	1
1342	district_2	M	FALSE	213	NA	24	NA	Servant	NA	NA	DeathBefore31	0
1343	district_2	F	TRUE	218	29	22	Upper class	Housewife	88	88	DeathObserved	1
1344	district_2	F	TRUE	221	35	26	Employee	Craftswoman	82	82	DeathObserved	1
1345	district_2	M	TRUE	220	32	28	Worker	Servant	37	37	DeathObserved	1
1346	district_2	M	TRUE	225	33	30	Middle class	Housewife	NA	NA	DeathBefore31	0
1347	district_2	F	TRUE	224	34	29	Worker	Housewife	65	65	DeathObserved	1
1348	district_2	F	TRUE	225	27	22	Upper class	Housewife	93	93	DeathObserved	1
1349	district_2	M	FALSE	232	NA	26	NA	Servant	NA	NA	DeathBefore31	0
1350	district_2	F	FALSE	232	NA	18	NA	Shopkeeper	NA	NA	DeathBefore31	0
1351	district_2	M	TRUE	231	34	32	Craftsman	Housewife	NA	NA	DeathBefore31	0
1352	district_2	M	TRUE	231	31	22	Shopkeeper	Shopkeeper	61	61	DeathObserved	1
1353	district_2	F	TRUE	234	28	25	Employee	Servant	77	77	DeathObserved	1
1354	district_2	M	TRUE	239	29	37	Worker	Housewife	76	76	DeathObserved	1
1355	district_2	F	TRUE	233	37	25	Upper class	Housewife	NA	NA	DeathBefore31	0
1356	district_2	F	TRUE	243	24	20	Employee	Worker	91	91	DeathObserved	1
1357	district_2	M	TRUE	245	34	29	Employee	Servant	87	87	DeathObserved	1
1358	district_2	M	FALSE	244	NA	28	NA	Housewife	53	53	DeathObserved	1
1359	district_2	F	TRUE	248	34	26	Shopkeeper	Housewife	82	82	DeathObserved	1
1360	district_2	F	TRUE	248	22	27	Upper class	Employee	NA	NA	DeathBefore31	0
1361	district_2	F	FALSE	252	46	26	NA	Housekeeper	66	66	DeathObserved	1
1362	district_2	M	TRUE	243	40	27	Upper class	Housewife	84	84	DeathObserved	1
1363	district_2	M	TRUE	254	26	24	Employee	Craftswoman	NA	NA	DeathBefore31	0
1364	district_2	F	TRUE	257	32	19	Worker	Housewife	NA	NA	DeathBefore31	0
1365	district_2	F	FALSE	259	NA	27	NA	Craftswoman	96	96	DeathObserved	1
1366	district_2	F	TRUE	261	31	27	Employee	NA	NA	101	Alive99	1
1367	district_2	F	FALSE	262	NA	22	NA	Housewife	NA	NA	DeathBefore31	0
1368	district_2	M	TRUE	255	30	20	Worker	Housewife	NA	NA	DeathBefore31	0
1369	district_2	M	FALSE	271	NA	23	NA	Servant	NA	NA	DeathBefore31	0
1370	district_2	F	FALSE	271	NA	23	NA	Craftswoman	NA	NA	DeathBefore31	0
1371	district_2	F	TRUE	278	28	20	Employee	Housewife	72	72	DeathObserved	1
1372	district_2	F	FALSE	276	NA	20	NA	Craftswoman	72	72	DeathObserved	1
1373	district_2	M	FALSE	282	NA	24	NA	Servant	77	77	DeathObserved	1
1374	district_2	F	TRUE	282	30	24	Worker	Worker	80	80	DeathObserved	1
1375	district_2	M	TRUE	284	34	32	Employee	Housewife	76	76	DeathObserved	1
1376	district_2	M	TRUE	290	26	30	Craftsman	Housewife	67	67	DeathObserved	1
1377	district_2	F	FALSE	301	NA	23	NA	Servant	87	87	DeathObserved	1
1378	district_2	F	FALSE	302	NA	30	NA	Servant	88	88	DeathObserved	1
1379	district_2	F	TRUE	303	34	38	Shopkeeper	Housekeeper	NA	NA	DeathBefore31	0
1380	district_2	M	TRUE	308	32	30	Employee	Craftswoman	NA	NA	DeathBefore31	0
1381	district_2	F	FALSE	311	NA	35	NA	Craftswoman	92	92	DeathObserved	1
1382	district_2	M	FALSE	314	NA	35	NA	Housekeeper	73	73	DeathObserved	1
1383	district_2	F	TRUE	315	35	27	Shopkeeper	Shopkeeper	90	90	DeathObserved	1
1384	district_2	F	TRUE	320	38	33	Employee	Housekeeper	NA	NA	DeathBefore31	0
1385	district_2	M	TRUE	321	25	24	Craftsman	Craftswoman	NA	NA	DeathBefore31	0
1386	district_2	F	TRUE	321	26	19	Craftsman	Housewife	88	88	DeathObserved	1
1387	district_2	M	TRUE	328	26	26	Shopkeeper	Shopkeeper	69	69	DeathObserved	1
1388	district_2	M	FALSE	327	NA	22	NA	Servant	NA	NA	DeathBefore31	0
1389	district_2	F	TRUE	327	37	30	Worker	Housewife	51	51	DeathObserved	1
1390	district_2	M	TRUE	340	29	28	Upper class	Employee	NA	NA	DeathBefore31	0
1391	district_2	F	TRUE	343	34	22	Employee	Shopkeeper	64	64	DeathObserved	1
1392	district_2	F	TRUE	343	31	20	Worker	Housekeeper	NA	NA	DeathBefore31	0
1393	district_2	F	FALSE	338	NA	18	NA	Worker	NA	NA	DeathBefore31	0
1394	district_2	F	TRUE	343	35	28	Craftsman	Housewife	81	81	DeathObserved	1
1395	district_2	M	TRUE	356	28	24	Shopkeeper	Housekeeper	74	74	DeathObserved	1
1396	district_2	F	FALSE	358	NA	27	NA	Housewife	NA	NA	DeathBefore31	0
1397	district_2	F	TRUE	357	29	34	Employee	Housekeeper	94	94	DeathObserved	1
1398	district_2	M	FALSE	364	NA	23	NA	Servant	NA	NA	DeathBefore31	0
1399	district_2	M	TRUE	367	38	26	Middle class	Craftswoman	NA	NA	DeathBefore31	0
1400	district_2	F	TRUE	370	31	33	Shopkeeper	Servant	NA	101	Alive99	1
1401	district_2	M	FALSE	312	NA	42	NA	Housewife	72	72	DeathObserved	1
1402	district_2	F	TRUE	377	21	18	Worker	Worker	NA	NA	DeathBefore31	0
1403	district_2	M	TRUE	371	40	36	Worker	Servant	89	89	DeathObserved	1
1404	district_2	M	FALSE	376	NA	20	NA	Craftswoman	NA	NA	DeathBefore31	0
1405	district_2	M	FALSE	389	NA	23	NA	Craftswoman	NA	NA	DeathBefore31	0
1406	district_2	F	FALSE	390	NA	39	NA	Housekeeper	NA	NA	DeathBefore31	0
1407	district_2	M	FALSE	398	NA	22	NA	Housekeeper	78	78	DeathObserved	1
1408	district_2	M	TRUE	406	28	22	Craftsman	Housewife	NA	NA	DeathBefore31	0
1409	district_2	F	TRUE	415	31	26	Upper class	Housewife	88	88	DeathObserved	1
1410	district_2	M	FALSE	423	NA	33	NA	Craftswoman	NA	NA	DeathBefore31	0
1411	district_2	F	FALSE	424	NA	24	NA	Housewife	NA	NA	DeathBefore31	0
1412	district_2	M	TRUE	431	36	30	Employee	Shopkeeper	85	85	DeathObserved	1
1413	district_2	M	FALSE	435	NA	26	NA	Housekeeper	NA	NA	DeathBefore31	0
1414	district_2	M	FALSE	438	NA	17	NA	Craftswoman	NA	NA	DeathBefore31	0
1415	district_2	F	TRUE	449	33	23	Upper class	Housewife	71	71	DeathObserved	1
1416	district_2	M	TRUE	449	38	36	Employee	Housewife	95	95	DeathObserved	1
1417	district_2	F	FALSE	452	NA	17	NA	Craftswoman	91	91	DeathObserved	1
1418	district_2	M	TRUE	458	31	28	Worker	Housekeeper	73	73	DeathObserved	1
1419	district_2	F	TRUE	467	25	29	Worker	Housekeeper	NA	NA	DeathBefore31	0
1420	district_2	F	TRUE	474	33	28	Upper class	Housewife	74	74	DeathObserved	1
1421	district_2	M	TRUE	483	26	27	Worker	Housekeeper	77	77	DeathObserved	1
1422	district_2	M	TRUE	486	28	32	Employee	Housekeeper	76	76	DeathObserved	1
1423	district_2	F	TRUE	484	44	29	Craftsman	Worker	85	85	DeathObserved	1
1424	district_2	M	TRUE	486	34	23	Worker	Housekeeper	53	53	DeathObserved	1
1425	district_2	M	FALSE	465	NA	15	NA	Worker	NA	NA	DeathBefore31	0
1426	district_2	F	TRUE	502	32	25	Worker	Worker	NA	NA	DeathBefore31	0
1427	district_2	M	TRUE	502	28	24	Employee	Employee	NA	NA	DeathBefore31	0
1428	district_2	F	FALSE	503	NA	21	NA	Craftswoman	NA	NA	DeathBefore31	0
1429	district_2	M	TRUE	509	45	32	Upper class	Housewife	83	83	DeathObserved	1
1430	district_2	F	FALSE	512	NA	24	NA	Shopkeeper	86	86	DeathObserved	1
1431	district_2	M	FALSE	522	NA	19	NA	UpperMiddleClass	NA	NA	DeathBefore31	0
1432	district_2	M	TRUE	526	39	32	Employee	Craftswoman	38	38	DeathObserved	1
1433	district_2	M	TRUE	525	42	26	Craftsman	Craftswoman	59	59	DeathObserved	1
1434	district_2	F	TRUE	535	29	24	Worker	Housekeeper	NA	NA	DeathBefore31	0
1435	district_2	M	FALSE	532	NA	18	NA	Shopkeeper	NA	NA	DeathBefore31	0
1436	district_2	M	TRUE	537	33	32	Worker	Worker	NA	NA	DeathBefore31	0
1437	district_2	M	FALSE	547	NA	26	NA	Housekeeper	51	51	DeathObserved	1
1438	district_2	M	TRUE	556	26	22	Employee	Craftswoman	73	73	DeathObserved	1
1439	district_2	M	FALSE	559	NA	27	NA	Craftswoman	66	66	DeathObserved	1
1440	district_2	F	TRUE	562	40	37	Employee	Housekeeper	90	90	DeathObserved	1
1441	district_2	M	TRUE	550	38	38	Employee	Craftswoman	95	95	DeathObserved	1
1442	district_2	F	TRUE	566	27	22	Worker	Housewife	95	95	DeathObserved	1
1443	district_2	F	FALSE	570	NA	26	NA	Employee	82	82	DeathObserved	1
1444	district_2	F	FALSE	587	NA	22	NA	Craftswoman	NA	NA	DeathBefore31	0
1445	district_2	F	TRUE	587	26	26	Worker	Craftswoman	84	84	DeathObserved	1
1446	district_2	M	FALSE	587	NA	18	NA	Worker	69	69	DeathObserved	1
1447	district_2	F	TRUE	595	31	34	Shopkeeper	Craftswoman	65	65	DeathObserved	1
1448	district_2	F	FALSE	595	NA	26	NA	Craftswoman	NA	NA	DeathBefore31	0
1449	district_2	M	TRUE	598	30	24	Employee	Housekeeper	NA	NA	DeathBefore31	0
1450	district_2	F	TRUE	605	21	24	Worker	Housewife	85	85	DeathObserved	1
1451	district_2	M	TRUE	617	40	31	Employee	Servant	NA	NA	DeathBefore31	0
1452	district_2	F	TRUE	623	30	23	Craftsman	Housewife	NA	NA	DeathBefore31	0
1453	district_2	M	FALSE	624	NA	29	NA	UpperMiddleClass	88	88	DeathObserved	1
1454	district_2	F	FALSE	636	NA	23	NA	Craftswoman	90	90	DeathObserved	1
1455	district_2	M	TRUE	642	39	23	Worker	Shopkeeper	32	32	DeathObserved	1
1456	district_2	M	TRUE	646	29	37	Worker	Housekeeper	75	75	DeathObserved	1
1457	district_2	M	TRUE	657	35	27	Shopkeeper	Shopkeeper	88	88	DeathObserved	1
1458	district_2	F	TRUE	668	23	23	Craftsman	Employee	87	87	DeathObserved	1
1459	district_2	F	FALSE	664	NA	24	NA	Craftswoman	80	80	DeathObserved	1
1460	district_2	F	TRUE	676	35	29	Employee	Housewife	90	90	DeathObserved	1
1461	district_2	M	TRUE	679	29	26	Worker	Craftswoman	71	71	DeathObserved	1
1462	district_2	F	FALSE	686	NA	27	NA	Craftswoman	NA	NA	DeathBefore31	0
1463	district_2	M	FALSE	697	NA	18	NA	Housekeeper	NA	NA	DeathBefore31	0
1464	district_2	F	TRUE	699	33	31	Upper class	Housewife	78	78	DeathObserved	1
1465	district_2	F	TRUE	706	35	30	Worker	Housekeeper	NA	NA	DeathBefore31	0
1466	district_2	F	TRUE	709	38	29	Upper class	Housewife	94	94	DeathObserved	1
1467	district_2	F	TRUE	723	25	25	Craftsman	Housekeeper	91	91	DeathObserved	1
1468	district_2	M	TRUE	720	45	38	Craftsman	Housekeeper	76	76	DeathObserved	1
1469	district_2	M	TRUE	724	27	20	Employee	Craftswoman	70	70	DeathObserved	1
1470	district_2	M	FALSE	717	NA	31	NA	Worker	NA	NA	DeathBefore31	0
1471	district_2	F	TRUE	731	48	27	Worker	Housewife	88	88	DeathObserved	1
1472	district_2	F	TRUE	731	36	34	Shopkeeper	Shopkeeper	91	91	DeathObserved	1
1473	district_2	F	TRUE	740	40	24	Upper class	Housewife	NA	NA	DeathBefore31	0
1474	district_2	M	TRUE	747	34	30	Upper class	Housekeeper	NA	NA	DeathBefore31	0
1475	district_2	F	TRUE	752	38	28	Upper class	Housewife	95	95	DeathObserved	1
1476	district_2	M	TRUE	757	41	38	Craftsman	Housekeeper	NA	NA	DeathBefore31	0
1477	district_2	M	TRUE	758	44	35	Worker	Housekeeper	35	35	DeathObserved	1
1478	district_2	F	FALSE	759	NA	24	NA	Employee	84	84	DeathObserved	1
1479	district_2	M	TRUE	760	31	28	Upper class	Housewife	NA	NA	DeathBefore31	0
1480	district_2	F	TRUE	767	36	27	Worker	Housekeeper	67	67	DeathObserved	1
1481	district_2	F	FALSE	776	NA	30	NA	Housekeeper	NA	NA	DeathBefore31	0
1482	district_2	M	FALSE	783	NA	21	NA	Worker	NA	NA	DeathBefore31	0
1483	district_2	F	FALSE	783	NA	24	NA	Craftswoman	NA	NA	DeathBefore31	0
1484	district_2	F	TRUE	816	37	23	Upper class	Housewife	NA	NA	DeathBefore31	0
1485	district_2	F	TRUE	819	27	23	Worker	Worker	NA	NA	DeathBefore31	0
1486	district_2	M	FALSE	822	NA	28	NA	Worker	98	98	DeathObserved	1
1487	district_2	M	TRUE	805	38	41	Worker	Craftswoman	77	77	DeathObserved	1
1488	district_2	F	FALSE	832	NA	36	NA	Servant	NA	NA	DeathBefore31	0
1489	district_2	M	FALSE	835	NA	27	NA	Employee	93	93	DeathObserved	1
1490	district_2	F	TRUE	842	34	25	Middle class	Housewife	51	51	DeathObserved	1
1491	district_2	F	TRUE	848	29	27	Worker	Housekeeper	NA	NA	DeathBefore31	0
1492	district_2	M	TRUE	872	55	32	Upper class	Housewife	80	80	DeathObserved	1
1509	district_16	F	TRUE	-13	31	21	Middle class	Housewife	NA	NA	DeathBefore31	0
1510	district_16	F	TRUE	-2	34	31	Craftsman	Servant	NA	NA	DeathBefore31	0
1511	district_16	M	TRUE	3	37	37	Employee	Craftswoman	83	83	DeathObserved	1
1512	district_16	M	FALSE	-19	NA	18	NA	Shopkeeper	91	91	DeathObserved	1
1513	district_16	M	TRUE	29	29	23	Employee	Housewife	77	77	DeathObserved	1
1514	district_16	F	TRUE	29	28	20	Upper class	Housewife	97	97	DeathObserved	1
1515	district_16	M	TRUE	29	28	21	Employee	Housewife	86	86	DeathObserved	1
1516	district_16	M	TRUE	28	26	21	Employee	UpperMiddleClass	72	72	DeathObserved	1
1517	district_16	M	TRUE	29	25	25	Employee	Housewife	80	80	DeathObserved	1
1518	district_16	M	TRUE	14	27	17	Employee	Craftswoman	76	76	DeathObserved	1
1519	district_16	F	TRUE	36	30	26	Employee	Housewife	92	92	DeathObserved	1
1520	district_16	F	TRUE	46	24	24	Worker	Housewife	NA	101	Alive99	1
1521	district_16	F	TRUE	35	34	40	Employee	Servant	93	93	DeathObserved	1
1522	district_16	F	TRUE	-14	28	19	Shopkeeper	Housewife	78	78	DeathObserved	1
1523	district_16	F	TRUE	54	26	26	Shopkeeper	Housewife	86	86	DeathObserved	1
1524	district_16	F	FALSE	76	NA	21	NA	Employee	NA	NA	DeathBefore31	0
1525	district_16	F	FALSE	76	NA	24	NA	Craftswoman	92	92	DeathObserved	1
1526	district_16	F	TRUE	74	26	24	Worker	Housekeeper	47	47	DeathObserved	1
1527	district_16	F	TRUE	77	28	19	Shopkeeper	Shopkeeper	87	87	DeathObserved	1
1528	district_16	F	TRUE	64	28	27	Worker	Housewife	74	74	DeathObserved	1
1529	district_16	F	TRUE	90	38	29	Shopkeeper	Housewife	89	89	DeathObserved	1
1530	district_16	F	TRUE	85	29	33	Shopkeeper	Housewife	NA	NA	DeathBefore31	0
1531	district_16	F	TRUE	96	41	29	Middle class	NA	74	74	DeathObserved	1
1532	district_16	M	TRUE	105	24	19	Shopkeeper	Housewife	95	95	DeathObserved	1
1533	district_16	M	TRUE	104	25	24	Shopkeeper	Housewife	65	65	DeathObserved	1
1534	district_16	M	TRUE	76	37	30	Craftsman	Worker	NA	NA	DeathBefore31	0
1535	district_16	F	TRUE	107	28	23	Employee	Housewife	90	90	DeathObserved	1
1536	district_16	F	TRUE	109	27	23	Worker	Craftswoman	90	90	DeathObserved	1
1537	district_16	M	TRUE	125	25	26	Shopkeeper	Housewife	67	67	DeathObserved	1
1538	district_16	F	TRUE	117	33	32	Upper class	Housewife	94	94	DeathObserved	1
1539	district_16	F	TRUE	128	35	29	Shopkeeper	Housewife	80	80	DeathObserved	1
1540	district_16	M	FALSE	137	NA	24	NA	Servant	61	61	DeathObserved	1
1541	district_16	F	FALSE	138	NA	22	NA	NA	82	82	DeathObserved	1
1542	district_16	F	TRUE	137	25	23	Employee	Housewife	NA	101	Alive99	1
1543	district_16	M	TRUE	136	32	26	Upper class	Housewife	66	66	DeathObserved	1
1544	district_16	F	FALSE	150	NA	32	NA	Employee	NA	NA	DeathBefore31	0
1545	district_16	M	TRUE	155	35	29	Craftsman	Housewife	84	84	DeathObserved	1
1546	district_16	M	TRUE	112	46	38	Upper class	Housewife	95	95	DeathObserved	1
1547	district_16	M	FALSE	153	NA	28	NA	Craftswoman	62	62	DeathObserved	1
1548	district_16	M	TRUE	163	38	28	Shopkeeper	NA	NA	NA	DeathBefore31	0
1549	district_16	M	TRUE	164	45	32	Employee	Housewife	67	67	DeathObserved	1
1550	district_16	M	TRUE	191	38	28	Upper class	Housewife	NA	NA	DeathBefore31	0
1551	district_16	F	TRUE	197	32	21	Craftsman	Craftswoman	56	56	DeathObserved	1
1552	district_16	M	TRUE	194	34	28	Employee	Worker	69	69	DeathObserved	1
1553	district_16	F	TRUE	198	29	26	Craftsman	Housewife	83	83	DeathObserved	1
1554	district_16	F	FALSE	205	NA	24	NA	Worker	81	81	DeathObserved	1
1555	district_16	M	TRUE	202	23	22	Employee	NA	93	93	DeathObserved	1
1556	district_16	F	TRUE	218	30	29	Craftsman	Housewife	85	85	DeathObserved	1
1557	district_16	M	TRUE	229	27	26	Employee	Housewife	NA	NA	DeathBefore31	0
1558	district_16	F	TRUE	235	31	22	Employee	Housewife	87	87	DeathObserved	1
1559	district_16	F	TRUE	234	33	31	Upper class	Housewife	83	83	DeathObserved	1
1560	district_16	F	TRUE	236	40	27	Worker	Housewife	52	52	DeathObserved	1
1561	district_16	M	TRUE	250	29	21	Upper class	Housewife	74	74	DeathObserved	1
1562	district_16	M	TRUE	256	33	27	Upper class	Housewife	87	87	DeathObserved	1
1563	district_16	M	TRUE	253	38	30	Employee	NA	84	84	DeathObserved	1
1564	district_16	F	TRUE	262	30	28	Worker	Worker	NA	NA	DeathBefore31	0
1565	district_16	F	TRUE	309	27	27	Shopkeeper	Housewife	90	90	DeathObserved	1
1566	district_16	M	TRUE	303	29	21	Employee	Housewife	61	61	DeathObserved	1
1567	district_16	F	TRUE	340	30	31	Worker	Craftswoman	83	83	DeathObserved	1
1568	district_16	F	TRUE	357	31	30	Craftsman	Housewife	NA	NA	DeathBefore31	0
1569	district_16	F	TRUE	355	33	24	Worker	Housewife	85	85	DeathObserved	1
1570	district_16	F	FALSE	426	NA	39	NA	Servant	NA	NA	DeathBefore31	0
1571	district_16	F	TRUE	436	34	38	Worker	Housewife	96	96	DeathObserved	1
1572	district_16	M	TRUE	475	25	20	Upper class	Housewife	NA	NA	DeathBefore31	0
1573	district_16	M	TRUE	513	38	31	Employee	Craftswoman	81	81	DeathObserved	1
1574	district_16	F	TRUE	541	39	28	Middle class	Housewife	NA	101	Alive99	1
1575	district_16	M	TRUE	559	40	41	Shopkeeper	Housewife	77	77	DeathObserved	1
1576	district_16	F	FALSE	582	NA	22	NA	Housewife	NA	NA	DeathBefore31	0
1577	district_16	M	TRUE	596	30	27	Worker	Servant	NA	NA	DeathBefore31	0
1578	district_16	F	TRUE	596	35	35	Craftsman	Housewife	75	75	DeathObserved	1
1579	district_16	F	TRUE	609	37	32	Employee	Housewife	76	76	DeathObserved	1
1580	district_16	F	TRUE	613	41	25	Middle class	Housewife	80	80	DeathObserved	1
1581	district_16	M	FALSE	641	NA	21	NA	Craftswoman	60	60	DeathObserved	1
1582	district_16	M	TRUE	661	42	25	Middle class	Housewife	NA	NA	DeathBefore31	0
1583	district_16	F	FALSE	678	NA	27	NA	Housewife	94	94	DeathObserved	1
1584	district_16	F	TRUE	711	22	22	Worker	Housewife	90	90	DeathObserved	1
1585	district_16	F	TRUE	713	38	26	Middle class	Housewife	NA	NA	DeathBefore31	0
1586	district_16	M	TRUE	710	45	41	Shopkeeper	Housewife	84	84	DeathObserved	1
1587	district_16	F	FALSE	738	NA	30	NA	Housewife	93	93	DeathObserved	1
1588	district_16	M	TRUE	735	30	21	Employee	Employee	NA	NA	DeathBefore31	0
1589	district_16	F	TRUE	743	28	22	Employee	Worker	61	61	DeathObserved	1
1590	district_16	M	FALSE	783	NA	22	NA	Servant	89	89	DeathObserved	1
1591	district_16	M	TRUE	784	55	25	Employee	Housewife	NA	NA	DeathBefore31	0
1592	district_16	M	TRUE	807	22	24	Craftsman	Craftswoman	62	62	DeathObserved	1
1593	district_16	M	TRUE	799	29	28	Craftsman	Craftswoman	NA	NA	DeathBefore31	0
1594	district_16	F	TRUE	822	40	30	Craftsman	Housewife	NA	NA	DeathBefore31	0
1595	district_16	F	FALSE	821	NA	27	NA	Employee	NA	NA	DeathBefore31	0
1596	district_16	M	TRUE	833	30	23	Employee	Employee	60	60	DeathObserved	1
1647	district_15	M	TRUE	-1	28	27	Worker	Servant	73	73	DeathObserved	1
1648	district_15	F	FALSE	2	NA	20	NA	Housekeeper	NA	NA	DeathBefore31	0
1649	district_15	M	TRUE	3	34	34	Employee	Servant	81	81	DeathObserved	1
1650	district_15	M	TRUE	1	34	32	Employee	Housekeeper	78	78	DeathObserved	1
1651	district_15	M	TRUE	3	28	23	Craftsman	Worker	91	91	DeathObserved	1
1652	district_15	F	TRUE	3	38	32	Employee	Housekeeper	NA	NA	DeathBefore31	0
1653	district_15	M	TRUE	4	28	23	Employee	Worker	NA	NA	DeathBefore31	0
1654	district_15	F	FALSE	4	NA	21	NA	Employee	NA	NA	DeathBefore31	0
1655	district_15	M	TRUE	3	28	25	Employee	Worker	NA	NA	DeathBefore31	0
1656	district_15	M	TRUE	5	25	26	Craftsman	Craftswoman	NA	NA	DeathBefore31	0
1657	district_15	F	FALSE	8	NA	23	NA	Servant	92	92	DeathObserved	1
1658	district_15	M	TRUE	8	41	29	Worker	Housekeeper	NA	NA	DeathBefore31	0
1659	district_15	M	TRUE	8	39	25	Middle class	Housewife	86	86	DeathObserved	1
1660	district_15	M	FALSE	7	NA	18	NA	Craftswoman	NA	NA	DeathBefore31	0
1661	district_15	M	TRUE	2	39	28	Craftsman	Worker	52	52	DeathObserved	1
1662	district_15	M	TRUE	7	37	27	Worker	Servant	71	71	DeathObserved	1
1663	district_15	M	TRUE	11	31	30	Worker	Housekeeper	75	75	DeathObserved	1
1664	district_15	F	FALSE	13	NA	23	NA	Servant	86	86	DeathObserved	1
1665	district_15	M	FALSE	10	NA	22	NA	Servant	NA	NA	DeathBefore31	0
1666	district_15	M	TRUE	12	27	23	Employee	Craftswoman	NA	NA	DeathBefore31	0
1667	district_15	M	TRUE	14	27	23	Craftsman	Shopkeeper	72	72	DeathObserved	1
1668	district_15	M	FALSE	16	NA	24	NA	Servant	89	89	DeathObserved	1
1669	district_15	F	FALSE	17	NA	23	NA	Servant	61	61	DeathObserved	1
1670	district_15	M	FALSE	16	NA	23	NA	Servant	NA	NA	DeathBefore31	0
1671	district_15	F	TRUE	12	48	40	Worker	UpperMiddleClass	56	56	DeathObserved	1
1672	district_15	F	TRUE	17	25	20	Worker	Servant	57	57	DeathObserved	1
1673	district_15	F	TRUE	17	38	26	Craftsman	Housekeeper	78	78	DeathObserved	1
1674	district_15	F	FALSE	17	NA	26	NA	Servant	NA	NA	DeathBefore31	0
1675	district_15	F	TRUE	17	31	32	Shopkeeper	Employee	NA	NA	DeathBefore31	0
1676	district_15	F	TRUE	23	23	22	Shopkeeper	Worker	75	75	DeathObserved	1
1677	district_15	M	TRUE	23	29	21	Worker	Craftswoman	84	84	DeathObserved	1
1678	district_15	M	FALSE	25	NA	32	NA	Housekeeper	92	92	DeathObserved	1
1679	district_15	M	TRUE	24	24	33	Shopkeeper	Housekeeper	94	94	DeathObserved	1
1680	district_15	M	TRUE	23	22	18	Worker	Craftswoman	NA	NA	DeathBefore31	0
1681	district_15	F	TRUE	24	25	24	Employee	Housekeeper	95	95	DeathObserved	1
1682	district_15	F	TRUE	24	31	27	Craftsman	Housekeeper	90	90	DeathObserved	1
1683	district_15	F	FALSE	27	NA	17	NA	Employee	83	83	DeathObserved	1
1684	district_15	M	FALSE	29	NA	24	NA	Craftswoman	88	88	DeathObserved	1
1685	district_15	F	TRUE	29	28	26	Craftsman	Housekeeper	NA	NA	DeathBefore31	0
1686	district_15	M	TRUE	31	33	25	Employee	Housewife	69	69	DeathObserved	1
1687	district_15	M	TRUE	28	33	28	Worker	Housekeeper	70	70	DeathObserved	1
1688	district_15	M	TRUE	32	26	22	Employee	Shopkeeper	41	41	DeathObserved	1
1689	district_15	M	TRUE	31	31	24	Worker	Housewife	NA	NA	DeathBefore31	0
1690	district_15	M	FALSE	32	NA	20	NA	Worker	39	39	DeathObserved	1
1691	district_15	M	FALSE	33	NA	28	NA	Servant	NA	NA	DeathBefore31	0
1692	district_15	M	TRUE	35	25	22	Worker	Housekeeper	NA	NA	DeathBefore31	0
1693	district_15	F	TRUE	35	26	26	Craftsman	Worker	77	77	DeathObserved	1
1694	district_15	F	TRUE	35	29	21	Employee	Craftswoman	92	92	DeathObserved	1
1695	district_15	M	TRUE	38	27	36	Worker	Worker	70	70	DeathObserved	1
1696	district_15	M	TRUE	37	32	27	Worker	Craftswoman	NA	NA	DeathBefore31	0
1697	district_15	M	TRUE	36	33	35	Craftsman	Housekeeper	72	72	DeathObserved	1
1698	district_15	M	FALSE	36	NA	22	NA	Servant	NA	NA	DeathBefore31	0
1699	district_15	F	FALSE	39	NA	20	NA	Worker	NA	NA	DeathBefore31	0
1700	district_15	M	TRUE	38	23	33	Employee	Housewife	81	81	DeathObserved	1
1701	district_15	F	TRUE	40	31	22	Shopkeeper	Shopkeeper	82	82	DeathObserved	1
1702	district_15	M	TRUE	43	27	20	Employee	Craftswoman	49	49	DeathObserved	1
1703	district_15	F	TRUE	43	22	21	Employee	Housekeeper	NA	NA	DeathBefore31	0
1704	district_15	M	FALSE	44	NA	21	NA	Employee	NA	NA	DeathBefore31	0
1705	district_15	F	TRUE	46	28	30	Worker	Housekeeper	NA	NA	DeathBefore31	0
1706	district_15	F	TRUE	46	33	35	Employee	Housewife	NA	101	Alive99	1
1707	district_15	M	TRUE	45	31	28	Craftsman	Craftswoman	83	83	DeathObserved	1
1708	district_15	F	TRUE	46	34	31	Craftsman	Craftswoman	86	86	DeathObserved	1
1709	district_15	F	TRUE	45	25	25	Craftsman	Housewife	77	77	DeathObserved	1
1710	district_15	F	TRUE	46	33	36	Craftsman	Worker	77	77	DeathObserved	1
1711	district_15	F	TRUE	48	26	25	Craftsman	Worker	38	38	DeathObserved	1
1712	district_15	F	FALSE	49	NA	34	NA	Employee	NA	NA	DeathBefore31	0
1713	district_15	M	TRUE	50	29	21	Worker	Housekeeper	81	81	DeathObserved	1
1714	district_15	M	TRUE	50	34	26	Employee	Housewife	78	78	DeathObserved	1
1715	district_15	M	FALSE	49	NA	21	NA	Servant	89	89	DeathObserved	1
1716	district_15	F	TRUE	50	36	34	Worker	Servant	94	94	DeathObserved	1
1717	district_15	M	TRUE	48	28	24	Worker	Housewife	NA	NA	DeathBefore31	0
1718	district_15	M	TRUE	48	28	24	Employee	Housewife	76	76	DeathObserved	1
1719	district_15	F	TRUE	51	24	22	Worker	Shopkeeper	75	75	DeathObserved	1
1720	district_15	F	TRUE	49	21	22	Middle class	Housewife	86	86	DeathObserved	1
1721	district_15	F	TRUE	48	19	18	Employee	Housewife	98	98	DeathObserved	1
1722	district_15	M	FALSE	48	NA	20	NA	Servant	93	93	DeathObserved	1
1723	district_15	M	TRUE	52	25	21	Craftsman	Housewife	NA	NA	DeathBefore31	0
1724	district_15	M	TRUE	56	28	25	Employee	Housewife	83	83	DeathObserved	1
1725	district_15	M	TRUE	56	27	30	Worker	Servant	74	74	DeathObserved	1
1726	district_15	F	FALSE	57	NA	22	NA	Craftswoman	90	90	DeathObserved	1
1727	district_15	F	FALSE	55	NA	32	NA	UpperMiddleClass	NA	NA	DeathBefore31	0
1728	district_15	F	FALSE	56	NA	22	NA	Servant	96	96	DeathObserved	1
1729	district_15	F	FALSE	58	NA	31	NA	Worker	93	93	DeathObserved	1
1730	district_15	F	FALSE	57	NA	27	NA	Shopkeeper	NA	NA	DeathBefore31	0
1731	district_15	M	TRUE	59	20	28	Worker	Worker	69	69	DeathObserved	1
1732	district_15	M	FALSE	59	NA	20	NA	Worker	73	73	DeathObserved	1
1733	district_15	M	FALSE	61	NA	23	NA	Servant	83	83	DeathObserved	1
1734	district_15	M	TRUE	62	27	30	Employee	Employee	NA	NA	DeathBefore31	0
1735	district_15	M	FALSE	62	NA	19	NA	Servant	78	78	DeathObserved	1
1736	district_15	M	FALSE	63	NA	33	NA	Employee	89	89	DeathObserved	1
1737	district_15	M	TRUE	60	38	32	Employee	Housewife	85	85	DeathObserved	1
1738	district_15	F	TRUE	64	31	26	Employee	Servant	NA	NA	DeathBefore31	0
1739	district_15	F	TRUE	64	34	29	Employee	Servant	82	82	DeathObserved	1
1740	district_15	M	TRUE	63	27	22	Worker	Housekeeper	NA	NA	DeathBefore31	0
1741	district_15	F	FALSE	66	NA	21	NA	UpperMiddleClass	96	96	DeathObserved	1
1742	district_15	F	TRUE	68	26	22	Shopkeeper	Housewife	NA	101	Alive99	1
1743	district_15	M	FALSE	69	NA	20	NA	Servant	88	88	DeathObserved	1
1744	district_15	M	TRUE	69	31	33	Craftsman	Shopkeeper	NA	NA	DeathBefore31	0
1745	district_15	F	TRUE	69	28	31	Employee	Housewife	75	75	DeathObserved	1
1746	district_15	M	FALSE	71	NA	24	NA	Housekeeper	NA	NA	DeathBefore31	0
1747	district_15	F	FALSE	69	NA	24	NA	Servant	84	84	DeathObserved	1
1748	district_15	F	TRUE	72	36	32	Worker	Housekeeper	89	89	DeathObserved	1
1749	district_15	M	TRUE	72	25	23	Employee	Housewife	NA	NA	DeathBefore31	0
1750	district_15	F	TRUE	70	20	19	Worker	Worker	71	71	DeathObserved	1
1751	district_15	M	TRUE	70	38	29	Employee	Housewife	NA	NA	DeathBefore31	0
1752	district_15	F	TRUE	71	NA	43	Craftsman	Employee	79	79	DeathObserved	1
1753	district_15	F	TRUE	70	24	28	Craftsman	Housewife	91	91	DeathObserved	1
1754	district_15	F	TRUE	72	39	33	Shopkeeper	Housewife	92	92	DeathObserved	1
1755	district_15	F	TRUE	72	31	24	Worker	Housekeeper	NA	101	Alive99	1
1756	district_15	F	FALSE	74	NA	19	NA	Servant	82	82	DeathObserved	1
1757	district_15	F	FALSE	76	NA	25	NA	Servant	73	73	DeathObserved	1
1758	district_15	M	FALSE	74	NA	17	NA	Craftswoman	NA	NA	DeathBefore31	0
1759	district_15	F	TRUE	79	35	30	Craftsman	Housekeeper	98	98	DeathObserved	1
1760	district_15	F	TRUE	76	28	26	Employee	UpperMiddleClass	52	52	DeathObserved	1
1761	district_15	F	FALSE	80	NA	28	NA	Craftswoman	NA	NA	DeathBefore31	0
1762	district_15	F	FALSE	83	NA	22	NA	Worker	NA	NA	DeathBefore31	0
1763	district_15	M	TRUE	82	35	25	Middle class	Housewife	NA	NA	DeathBefore31	0
1764	district_15	F	FALSE	85	NA	21	NA	Servant	NA	NA	DeathBefore31	0
1765	district_15	F	TRUE	86	38	33	Worker	Housekeeper	NA	NA	DeathBefore31	0
1766	district_15	F	FALSE	85	NA	30	NA	Shopkeeper	98	98	DeathObserved	1
1767	district_15	F	FALSE	85	NA	29	NA	Shopkeeper	88	88	DeathObserved	1
1768	district_15	F	FALSE	86	28	27	NA	Housekeeper	81	81	DeathObserved	1
1769	district_15	M	FALSE	88	NA	25	NA	Worker	NA	NA	DeathBefore31	0
1770	district_15	M	TRUE	89	41	32	Worker	Housewife	60	60	DeathObserved	1
1771	district_15	F	TRUE	91	30	29	Worker	Housekeeper	89	89	DeathObserved	1
1772	district_15	F	TRUE	92	NA	26	Employee	Servant	89	89	DeathObserved	1
1773	district_15	F	TRUE	90	25	26	Worker	Housekeeper	NA	101	Alive99	1
1774	district_15	M	FALSE	94	NA	21	NA	Housekeeper	NA	NA	DeathBefore31	0
1775	district_15	F	FALSE	94	NA	23	NA	Servant	NA	NA	DeathBefore31	0
1776	district_15	F	TRUE	96	26	26	Craftsman	Housekeeper	89	89	DeathObserved	1
1777	district_15	M	TRUE	95	26	22	Employee	Employee	73	73	DeathObserved	1
1778	district_15	M	TRUE	97	35	37	Worker	Housekeeper	73	73	DeathObserved	1
1779	district_15	M	FALSE	100	NA	20	NA	Worker	84	84	DeathObserved	1
1780	district_15	M	FALSE	100	NA	21	NA	Housewife	82	82	DeathObserved	1
1781	district_15	M	TRUE	100	29	25	Worker	Worker	62	62	DeathObserved	1
1782	district_15	M	TRUE	99	24	20	Craftsman	Shopkeeper	48	48	DeathObserved	1
1783	district_15	F	FALSE	102	NA	31	NA	Servant	83	83	DeathObserved	1
1784	district_15	F	TRUE	102	33	29	Employee	Housewife	70	70	DeathObserved	1
1785	district_15	F	FALSE	102	NA	31	NA	Housekeeper	91	91	DeathObserved	1
1786	district_15	M	TRUE	102	45	39	Employee	Housekeeper	87	87	DeathObserved	1
1787	district_15	M	FALSE	105	NA	22	NA	Worker	NA	NA	DeathBefore31	0
1788	district_15	M	FALSE	104	NA	31	NA	Servant	NA	NA	DeathBefore31	0
1789	district_15	M	TRUE	104	38	33	Upper class	Housewife	75	75	DeathObserved	1
1790	district_15	F	FALSE	108	NA	18	NA	Worker	NA	NA	DeathBefore31	0
1791	district_15	M	TRUE	107	39	23	Worker	Housekeeper	73	73	DeathObserved	1
1792	district_15	M	TRUE	109	27	20	Employee	Housewife	79	79	DeathObserved	1
1793	district_15	F	TRUE	111	36	33	Employee	Housekeeper	95	95	DeathObserved	1
1794	district_15	F	TRUE	111	44	30	Worker	Worker	96	96	DeathObserved	1
1795	district_15	M	TRUE	111	40	38	Worker	Housekeeper	68	68	DeathObserved	1
1796	district_15	M	FALSE	113	NA	23	NA	Craftswoman	68	68	DeathObserved	1
1797	district_15	F	TRUE	114	24	24	Employee	Housekeeper	58	58	DeathObserved	1
1798	district_15	M	TRUE	113	26	23	Craftsman	Craftswoman	31	31	DeathObserved	1
1799	district_15	F	TRUE	116	29	23	Craftsman	Worker	NA	NA	DeathBefore31	0
1800	district_15	M	TRUE	118	18	18	Worker	Craftswoman	94	94	DeathObserved	1
1801	district_15	M	TRUE	115	41	38	Worker	Housewife	61	61	DeathObserved	1
1802	district_15	F	FALSE	117	NA	28	NA	Servant	81	81	DeathObserved	1
1803	district_15	M	TRUE	120	25	21	Worker	Servant	97	97	DeathObserved	1
1804	district_15	M	TRUE	118	36	33	Employee	Housewife	NA	NA	DeathBefore31	0
1805	district_15	F	FALSE	122	NA	38	NA	Servant	NA	NA	DeathBefore31	0
1806	district_15	M	FALSE	121	NA	24	NA	Servant	88	88	DeathObserved	1
1807	district_15	M	FALSE	124	NA	22	NA	Servant	52	52	DeathObserved	1
1808	district_15	F	TRUE	126	27	19	Worker	Worker	NA	NA	DeathBefore31	0
1809	district_15	M	TRUE	123	25	26	Middle class	Housewife	59	59	DeathObserved	1
1810	district_15	F	TRUE	122	46	34	Worker	Worker	94	94	DeathObserved	1
1811	district_15	M	TRUE	126	26	25	Middle class	Craftswoman	84	84	DeathObserved	1
1812	district_15	F	FALSE	126	NA	19	NA	Employee	NA	NA	DeathBefore31	0
1813	district_15	M	TRUE	129	28	18	Worker	Housewife	80	80	DeathObserved	1
1814	district_15	F	FALSE	129	NA	22	NA	Servant	NA	NA	DeathBefore31	0
1815	district_15	M	FALSE	131	NA	23	NA	Worker	NA	NA	DeathBefore31	0
1816	district_15	F	TRUE	132	30	29	Craftsman	Worker	73	73	DeathObserved	1
1817	district_15	M	TRUE	134	24	19	Employee	Worker	NA	NA	DeathBefore31	0
1818	district_15	F	TRUE	131	38	33	Employee	Employee	83	83	DeathObserved	1
1819	district_15	F	TRUE	134	49	38	Craftsman	Servant	NA	NA	DeathBefore31	0
1820	district_15	F	FALSE	136	NA	22	NA	Craftswoman	NA	NA	DeathBefore31	0
1821	district_15	F	FALSE	135	NA	35	NA	Worker	89	89	DeathObserved	1
1822	district_15	F	TRUE	135	25	27	Craftsman	Housekeeper	43	43	DeathObserved	1
1823	district_15	M	FALSE	138	NA	22	NA	Worker	NA	NA	DeathBefore31	0
1824	district_15	F	FALSE	138	NA	23	NA	Shopkeeper	NA	NA	DeathBefore31	0
1825	district_15	M	TRUE	140	38	27	Worker	Worker	76	76	DeathObserved	1
1826	district_15	M	TRUE	137	32	29	Craftsman	Shopkeeper	60	60	DeathObserved	1
1827	district_15	M	TRUE	137	36	32	Worker	Servant	NA	NA	DeathBefore31	0
1828	district_15	F	TRUE	141	30	27	Craftsman	Shopkeeper	87	87	DeathObserved	1
1829	district_15	M	FALSE	139	NA	24	NA	Craftswoman	80	80	DeathObserved	1
1830	district_15	M	FALSE	140	NA	21	NA	Housekeeper	62	62	DeathObserved	1
1831	district_15	M	FALSE	141	NA	30	NA	Housekeeper	NA	NA	DeathBefore31	0
1832	district_15	F	FALSE	143	NA	21	NA	Craftswoman	NA	NA	DeathBefore31	0
1833	district_15	M	TRUE	141	38	23	Shopkeeper	Shopkeeper	77	77	DeathObserved	1
1834	district_15	M	TRUE	140	30	21	Worker	Craftswoman	70	70	DeathObserved	1
1835	district_15	M	TRUE	141	27	28	Employee	Worker	75	75	DeathObserved	1
1836	district_15	F	TRUE	142	27	23	Employee	Housewife	85	85	DeathObserved	1
1837	district_15	M	TRUE	144	30	25	Craftsman	Craftswoman	94	94	DeathObserved	1
1838	district_15	F	TRUE	144	50	39	Craftsman	Servant	82	82	DeathObserved	1
1839	district_15	M	FALSE	143	NA	18	NA	Housewife	83	83	DeathObserved	1
1840	district_15	M	TRUE	147	46	31	Craftsman	Worker	64	64	DeathObserved	1
1841	district_15	F	FALSE	147	NA	22	NA	Worker	NA	NA	DeathBefore31	0
1842	district_15	F	TRUE	147	27	20	Worker	Worker	78	78	DeathObserved	1
1843	district_15	M	TRUE	148	31	29	Employee	Servant	80	80	DeathObserved	1
1844	district_15	F	FALSE	147	NA	22	NA	Employee	NA	NA	DeathBefore31	0
1845	district_15	M	TRUE	150	35	34	Shopkeeper	Housekeeper	NA	NA	DeathBefore31	0
1846	district_15	M	FALSE	151	NA	22	NA	Servant	NA	NA	DeathBefore31	0
1847	district_15	F	TRUE	149	35	26	Worker	Worker	NA	NA	DeathBefore31	0
1848	district_15	F	TRUE	152	38	36	Worker	Housewife	NA	NA	DeathBefore31	0
1849	district_15	F	TRUE	153	32	32	Worker	Worker	87	87	DeathObserved	1
1850	district_15	M	FALSE	151	NA	19	NA	Servant	NA	NA	DeathBefore31	0
1851	district_15	F	TRUE	151	30	29	Middle class	Housewife	NA	101	Alive99	1
1852	district_15	F	FALSE	153	NA	23	NA	Servant	NA	NA	DeathBefore31	0
1853	district_15	M	TRUE	153	28	21	Middle class	Housewife	41	41	DeathObserved	1
1854	district_15	F	TRUE	155	35	25	Shopkeeper	Shopkeeper	94	94	DeathObserved	1
1855	district_15	M	TRUE	155	30	30	Craftsman	Housewife	87	87	DeathObserved	1
1856	district_15	F	FALSE	158	NA	20	NA	Craftswoman	93	93	DeathObserved	1
1857	district_15	M	TRUE	159	23	23	Worker	Housewife	NA	NA	DeathBefore31	0
1858	district_15	M	TRUE	160	26	24	Worker	Craftswoman	76	76	DeathObserved	1
1859	district_15	F	TRUE	161	32	31	Worker	Housekeeper	47	47	DeathObserved	1
1860	district_15	F	TRUE	164	25	20	Craftsman	Housewife	77	77	DeathObserved	1
1861	district_15	M	TRUE	164	22	20	Worker	Worker	NA	NA	DeathBefore31	0
1862	district_15	F	TRUE	163	31	30	Shopkeeper	Housekeeper	97	97	DeathObserved	1
1863	district_15	M	TRUE	163	27	21	Employee	Housewife	NA	NA	DeathBefore31	0
1864	district_15	M	FALSE	162	NA	21	NA	Worker	87	87	DeathObserved	1
1865	district_15	M	TRUE	166	25	25	Craftsman	Craftswoman	90	90	DeathObserved	1
1866	district_15	F	TRUE	165	26	20	Worker	Housewife	NA	NA	DeathBefore31	0
1867	district_15	F	TRUE	164	28	26	Shopkeeper	Craftswoman	NA	NA	DeathBefore31	0
1868	district_15	F	TRUE	160	30	27	Worker	Craftswoman	59	59	DeathObserved	1
1869	district_15	F	TRUE	165	20	18	Worker	Craftswoman	92	92	DeathObserved	1
1870	district_15	F	TRUE	168	32	28	Worker	Housewife	NA	NA	DeathBefore31	0
1871	district_15	F	TRUE	168	22	24	Craftsman	Housewife	88	88	DeathObserved	1
1872	district_15	F	FALSE	170	NA	26	NA	Worker	73	73	DeathObserved	1
1873	district_15	F	FALSE	167	NA	28	NA	Shopkeeper	NA	NA	DeathBefore31	0
1874	district_15	F	TRUE	169	26	22	Employee	Housekeeper	NA	NA	DeathBefore31	0
1875	district_15	F	FALSE	170	NA	22	NA	Craftswoman	86	86	DeathObserved	1
1876	district_15	F	FALSE	169	NA	26	NA	Worker	86	86	DeathObserved	1
1877	district_15	F	TRUE	169	26	21	Employee	Housewife	94	94	DeathObserved	1
1878	district_15	F	TRUE	169	35	31	Craftsman	Housekeeper	NA	NA	DeathBefore31	0
1879	district_15	F	TRUE	168	31	29	Worker	Housekeeper	49	49	DeathObserved	1
1880	district_15	F	FALSE	171	NA	23	NA	Housewife	84	84	DeathObserved	1
1881	district_15	M	FALSE	173	NA	22	NA	Craftswoman	NA	NA	DeathBefore31	0
1882	district_15	M	FALSE	174	NA	22	NA	Craftswoman	91	91	DeathObserved	1
1883	district_15	F	FALSE	174	NA	21	NA	Worker	NA	NA	DeathBefore31	0
1884	district_15	M	TRUE	175	27	28	Middle class	Craftswoman	NA	NA	DeathBefore31	0
1885	district_15	M	TRUE	177	35	27	Worker	Housekeeper	NA	NA	DeathBefore31	0
1886	district_15	F	TRUE	176	25	26	Employee	Craftswoman	74	74	DeathObserved	1
1887	district_15	F	TRUE	174	28	30	Craftsman	Housekeeper	72	72	DeathObserved	1
1888	district_15	F	FALSE	178	NA	26	NA	Craftswoman	71	71	DeathObserved	1
1889	district_15	F	TRUE	177	31	26	Employee	Housekeeper	NA	NA	DeathBefore31	0
1890	district_15	M	TRUE	179	31	27	Worker	Housewife	94	94	DeathObserved	1
1891	district_15	M	TRUE	180	25	29	Middle class	Craftswoman	73	73	DeathObserved	1
1892	district_15	M	TRUE	180	30	27	Worker	Housewife	82	82	DeathObserved	1
1893	district_15	F	TRUE	180	27	26	Employee	Housekeeper	89	89	DeathObserved	1
1894	district_15	M	TRUE	180	27	21	Craftsman	Worker	NA	NA	DeathBefore31	0
1895	district_15	M	TRUE	183	29	29	Employee	Housekeeper	87	87	DeathObserved	1
1896	district_15	M	TRUE	182	23	19	Worker	Employee	NA	NA	DeathBefore31	0
1897	district_15	M	TRUE	183	26	28	Employee	Worker	82	82	DeathObserved	1
1898	district_15	F	FALSE	182	NA	25	NA	Worker	81	81	DeathObserved	1
1899	district_15	M	FALSE	186	NA	24	NA	Housekeeper	83	83	DeathObserved	1
1900	district_15	M	FALSE	187	NA	23	NA	Housekeeper	NA	NA	DeathBefore31	0
1901	district_15	F	TRUE	185	27	26	Employee	Housewife	NA	NA	DeathBefore31	0
1902	district_15	F	TRUE	186	32	30	Worker	Housewife	88	88	DeathObserved	1
1903	district_15	M	TRUE	189	28	27	Craftsman	Servant	76	76	DeathObserved	1
1904	district_15	F	FALSE	186	NA	21	NA	Employee	NA	101	Alive99	1
1905	district_15	M	TRUE	191	39	33	Worker	Housekeeper	65	65	DeathObserved	1
1906	district_15	F	TRUE	191	37	30	Craftsman	Housekeeper	96	96	DeathObserved	1
1907	district_15	M	TRUE	191	26	19	Craftsman	Housekeeper	73	73	DeathObserved	1
1908	district_15	F	TRUE	191	33	29	Employee	Housekeeper	86	86	DeathObserved	1
1909	district_15	M	FALSE	193	NA	23	NA	Worker	84	84	DeathObserved	1
1910	district_15	M	FALSE	194	NA	23	NA	Housekeeper	NA	NA	DeathBefore31	0
1911	district_15	F	TRUE	195	27	23	Craftsman	Housekeeper	90	90	DeathObserved	1
1912	district_15	M	TRUE	194	35	23	Employee	Housewife	78	78	DeathObserved	1
1913	district_15	M	FALSE	196	NA	27	NA	Employee	75	75	DeathObserved	1
1914	district_15	M	FALSE	193	NA	20	NA	Craftswoman	95	95	DeathObserved	1
1915	district_15	M	FALSE	198	NA	30	NA	Craftswoman	71	71	DeathObserved	1
1916	district_15	M	TRUE	195	30	25	Upper class	Housewife	NA	NA	DeathBefore31	0
1917	district_15	M	TRUE	195	30	30	Employee	Employee	57	57	DeathObserved	1
1918	district_15	M	TRUE	198	26	31	Craftsman	Housewife	88	88	DeathObserved	1
1919	district_15	F	FALSE	176	NA	43	NA	Worker	87	87	DeathObserved	1
1920	district_15	F	FALSE	200	NA	28	NA	Housekeeper	NA	NA	DeathBefore31	0
1921	district_15	F	TRUE	197	43	33	Employee	Craftswoman	65	65	DeathObserved	1
1922	district_15	F	TRUE	200	28	26	Craftsman	Housekeeper	66	66	DeathObserved	1
1923	district_15	M	TRUE	202	22	22	Craftsman	Housewife	89	89	DeathObserved	1
1924	district_15	F	TRUE	203	25	26	Worker	Housekeeper	53	53	DeathObserved	1
1925	district_15	F	TRUE	203	37	24	Employee	Housewife	70	70	DeathObserved	1
1926	district_15	F	TRUE	202	25	24	Worker	Worker	NA	NA	DeathBefore31	0
1927	district_15	F	TRUE	201	30	29	Employee	Employee	90	90	DeathObserved	1
1928	district_15	F	TRUE	200	33	36	Worker	Worker	NA	NA	DeathBefore31	0
1929	district_15	F	FALSE	205	NA	19	NA	UpperMiddleClass	80	80	DeathObserved	1
1930	district_15	F	TRUE	203	31	29	Worker	Worker	92	92	DeathObserved	1
1931	district_15	M	FALSE	207	NA	21	NA	Servant	NA	NA	DeathBefore31	0
1932	district_15	M	TRUE	206	28	24	Employee	Employee	77	77	DeathObserved	1
1933	district_15	F	FALSE	209	NA	31	NA	Housekeeper	70	70	DeathObserved	1
1934	district_15	M	TRUE	209	25	25	Craftsman	Housekeeper	61	61	DeathObserved	1
1935	district_15	F	FALSE	211	NA	23	NA	Servant	88	88	DeathObserved	1
1936	district_15	M	TRUE	206	37	36	Worker	Worker	55	55	DeathObserved	1
1937	district_15	F	TRUE	212	28	23	Employee	Craftswoman	93	93	DeathObserved	1
1938	district_15	F	TRUE	212	18	19	Worker	Craftswoman	80	80	DeathObserved	1
1939	district_15	F	TRUE	212	34	30	Employee	Housewife	86	86	DeathObserved	1
1940	district_15	M	TRUE	213	26	28	Craftsman	Housewife	90	90	DeathObserved	1
1941	district_15	M	FALSE	213	NA	23	NA	Worker	80	80	DeathObserved	1
1942	district_15	M	TRUE	214	22	20	Craftsman	Housewife	92	92	DeathObserved	1
1943	district_15	F	TRUE	214	31	26	Employee	Housekeeper	78	78	DeathObserved	1
1944	district_15	M	TRUE	214	41	30	Worker	Worker	69	69	DeathObserved	1
1945	district_15	F	TRUE	217	31	33	Middle class	UpperMiddleClass	97	97	DeathObserved	1
1946	district_15	M	TRUE	219	27	23	Worker	Worker	58	58	DeathObserved	1
1947	district_15	M	FALSE	219	NA	19	NA	Shopkeeper	83	83	DeathObserved	1
1948	district_15	M	TRUE	219	28	20	Worker	Employee	96	96	DeathObserved	1
1949	district_15	F	TRUE	220	31	21	Middle class	Housewife	64	64	DeathObserved	1
1950	district_15	F	FALSE	224	NA	20	NA	Servant	NA	NA	DeathBefore31	0
1951	district_15	F	TRUE	225	29	22	Worker	Craftswoman	NA	NA	DeathBefore31	0
1952	district_15	F	FALSE	210	NA	17	NA	Servant	97	97	DeathObserved	1
1953	district_15	F	FALSE	224	NA	30	NA	Servant	NA	NA	DeathBefore31	0
1954	district_15	M	FALSE	224	NA	30	NA	Servant	NA	NA	DeathBefore31	0
1955	district_15	F	TRUE	223	31	31	Craftsman	Housewife	64	64	DeathObserved	1
1956	district_15	F	FALSE	227	NA	21	NA	Servant	NA	NA	DeathBefore31	0
1957	district_15	M	TRUE	228	27	25	Worker	Servant	55	55	DeathObserved	1
1958	district_15	M	FALSE	225	NA	29	NA	Worker	73	73	DeathObserved	1
1959	district_15	F	TRUE	225	24	23	Worker	Housekeeper	78	78	DeathObserved	1
1960	district_15	F	TRUE	224	42	39	Worker	Worker	71	71	DeathObserved	1
1961	district_15	F	FALSE	228	NA	29	NA	Housekeeper	94	94	DeathObserved	1
1962	district_15	F	FALSE	227	NA	23	NA	Servant	91	91	DeathObserved	1
1963	district_15	M	FALSE	230	NA	21	NA	Servant	69	69	DeathObserved	1
1964	district_15	M	TRUE	227	26	24	Employee	Servant	NA	NA	DeathBefore31	0
1965	district_15	M	TRUE	229	38	29	Worker	Housekeeper	66	66	DeathObserved	1
1966	district_15	F	FALSE	228	NA	23	NA	Housekeeper	92	92	DeathObserved	1
1967	district_15	M	TRUE	228	31	22	Craftsman	Servant	79	79	DeathObserved	1
1968	district_15	F	TRUE	230	31	24	Craftsman	Housewife	61	61	DeathObserved	1
1969	district_15	M	FALSE	227	NA	22	NA	Housewife	84	84	DeathObserved	1
1970	district_15	M	FALSE	232	NA	30	NA	Worker	NA	NA	DeathBefore31	0
1971	district_15	F	TRUE	233	38	33	Worker	Housekeeper	33	33	DeathObserved	1
1972	district_15	F	TRUE	233	28	22	Employee	Servant	61	61	DeathObserved	1
1973	district_15	F	FALSE	235	NA	19	NA	Servant	NA	NA	DeathBefore31	0
1974	district_15	M	TRUE	234	20	23	Shopkeeper	Craftswoman	69	69	DeathObserved	1
1975	district_15	F	TRUE	236	28	24	Worker	Worker	89	89	DeathObserved	1
1976	district_15	M	FALSE	235	NA	21	NA	Servant	40	40	DeathObserved	1
1977	district_15	F	FALSE	234	NA	19	NA	Worker	69	69	DeathObserved	1
1978	district_15	F	FALSE	234	NA	25	NA	Housewife	79	79	DeathObserved	1
1979	district_15	F	TRUE	235	30	25	Craftsman	Worker	61	61	DeathObserved	1
1980	district_15	M	TRUE	236	34	33	Employee	UpperMiddleClass	86	86	DeathObserved	1
1981	district_15	M	FALSE	237	NA	27	NA	Housekeeper	NA	NA	DeathBefore31	0
1982	district_15	M	TRUE	238	27	23	Craftsman	Housewife	NA	NA	DeathBefore31	0
1983	district_15	M	TRUE	237	36	31	Worker	Housewife	NA	NA	DeathBefore31	0
1984	district_15	M	FALSE	239	NA	29	NA	Worker	NA	NA	DeathBefore31	0
1985	district_15	M	TRUE	232	29	30	Employee	Servant	89	89	DeathObserved	1
1986	district_15	M	TRUE	241	37	32	Employee	Housewife	NA	NA	DeathBefore31	0
1987	district_15	F	TRUE	238	40	33	Worker	Housekeeper	83	83	DeathObserved	1
1988	district_15	M	TRUE	241	31	26	Employee	Craftswoman	88	88	DeathObserved	1
1989	district_15	F	TRUE	241	34	26	Worker	Craftswoman	90	90	DeathObserved	1
1990	district_15	F	FALSE	242	NA	21	NA	Craftswoman	NA	NA	DeathBefore31	0
1991	district_15	M	FALSE	243	NA	23	NA	Craftswoman	67	67	DeathObserved	1
1992	district_15	F	TRUE	243	31	36	Employee	Housekeeper	NA	NA	DeathBefore31	0
1993	district_15	M	FALSE	243	NA	24	NA	Servant	61	61	DeathObserved	1
1994	district_15	M	TRUE	243	26	20	Employee	Housekeeper	82	82	DeathObserved	1
1995	district_15	M	FALSE	245	NA	26	NA	Servant	NA	NA	DeathBefore31	0
1996	district_15	F	FALSE	247	NA	25	NA	Housewife	74	74	DeathObserved	1
1997	district_15	F	TRUE	246	28	25	Worker	Craftswoman	NA	NA	DeathBefore31	0
1998	district_15	M	TRUE	246	35	23	Employee	Housewife	96	96	DeathObserved	1
1999	district_15	M	TRUE	248	32	29	Employee	Housewife	71	71	DeathObserved	1
2000	district_15	F	FALSE	248	NA	22	NA	Servant	64	64	DeathObserved	1
2001	district_15	M	FALSE	248	NA	17	NA	Craftswoman	NA	NA	DeathBefore31	0
2002	district_15	F	TRUE	252	36	31	Worker	Housekeeper	NA	NA	DeathBefore31	0
2003	district_15	F	TRUE	249	23	20	Craftsman	Housewife	NA	NA	DeathBefore31	0
2004	district_15	M	FALSE	253	NA	25	NA	Servant	NA	NA	DeathBefore31	0
2005	district_15	F	TRUE	253	35	26	Worker	Housekeeper	66	66	DeathObserved	1
2006	district_15	F	TRUE	254	38	35	Shopkeeper	Shopkeeper	87	87	DeathObserved	1
2007	district_15	M	TRUE	253	24	18	Worker	Worker	83	83	DeathObserved	1
2008	district_15	F	FALSE	253	NA	20	NA	Shopkeeper	NA	NA	DeathBefore31	0
2009	district_15	M	TRUE	254	25	23	Worker	Housekeeper	95	95	DeathObserved	1
2010	district_15	M	TRUE	254	28	20	Craftsman	Housekeeper	NA	NA	DeathBefore31	0
2011	district_15	M	TRUE	256	21	23	Craftsman	Employee	60	60	DeathObserved	1
2012	district_15	M	TRUE	254	41	36	Craftsman	Craftswoman	NA	NA	DeathBefore31	0
2013	district_15	M	FALSE	259	NA	18	NA	Servant	NA	NA	DeathBefore31	0
2014	district_15	F	TRUE	261	25	22	Worker	Worker	71	71	DeathObserved	1
2015	district_15	F	FALSE	262	NA	27	NA	Servant	44	44	DeathObserved	1
2016	district_15	F	FALSE	258	NA	23	NA	Servant	NA	NA	DeathBefore31	0
2017	district_15	F	TRUE	260	44	37	Craftsman	Worker	76	76	DeathObserved	1
2018	district_15	F	TRUE	263	33	23	Employee	Servant	85	85	DeathObserved	1
2019	district_15	F	TRUE	266	22	20	Worker	Craftswoman	94	94	DeathObserved	1
2020	district_15	F	TRUE	267	26	19	Worker	Worker	NA	NA	DeathBefore31	0
2021	district_15	M	TRUE	266	31	26	Worker	Housewife	88	88	DeathObserved	1
2022	district_15	F	TRUE	266	26	22	Shopkeeper	Housewife	60	60	DeathObserved	1
2023	district_15	M	TRUE	269	39	37	Craftsman	Shopkeeper	88	88	DeathObserved	1
2024	district_15	M	FALSE	270	NA	27	NA	Servant	82	82	DeathObserved	1
2025	district_15	M	FALSE	267	NA	32	NA	Worker	NA	NA	DeathBefore31	0
2026	district_15	F	TRUE	271	NA	21	Worker	Employee	94	94	DeathObserved	1
2027	district_15	M	TRUE	270	32	24	Employee	Housewife	86	86	DeathObserved	1
2028	district_15	F	TRUE	270	37	28	Worker	Housewife	89	89	DeathObserved	1
2029	district_15	F	FALSE	270	NA	23	NA	Craftswoman	71	71	DeathObserved	1
2030	district_15	M	TRUE	273	32	27	Worker	Housekeeper	68	68	DeathObserved	1
2031	district_15	F	FALSE	276	NA	26	NA	Craftswoman	85	85	DeathObserved	1
2032	district_15	M	FALSE	274	NA	21	NA	Servant	82	82	DeathObserved	1
2033	district_15	M	TRUE	274	20	17	Worker	Housewife	80	80	DeathObserved	1
2034	district_15	F	TRUE	280	23	19	Worker	Worker	NA	NA	DeathBefore31	0
2035	district_15	F	FALSE	280	NA	23	NA	Worker	84	84	DeathObserved	1
2036	district_15	F	TRUE	287	35	31	Worker	Craftswoman	97	97	DeathObserved	1
2037	district_15	F	FALSE	295	NA	21	NA	Worker	NA	NA	DeathBefore31	0
2038	district_15	F	TRUE	291	26	24	Craftsman	Worker	87	87	DeathObserved	1
2039	district_15	M	TRUE	290	45	37	Middle class	Servant	NA	NA	DeathBefore31	0
2040	district_15	M	FALSE	289	NA	38	NA	Worker	82	82	DeathObserved	1
2041	district_15	F	TRUE	296	33	29	Employee	Housewife	60	60	DeathObserved	1
2042	district_15	F	FALSE	301	NA	21	NA	Employee	NA	NA	DeathBefore31	0
2043	district_15	M	TRUE	302	44	34	Shopkeeper	Shopkeeper	91	91	DeathObserved	1
2044	district_15	M	TRUE	303	33	26	Employee	Worker	66	66	DeathObserved	1
2045	district_15	M	TRUE	304	38	31	Craftsman	Worker	NA	NA	DeathBefore31	0
2046	district_15	M	FALSE	308	NA	18	NA	Housekeeper	NA	NA	DeathBefore31	0
2047	district_15	F	FALSE	309	NA	30	NA	Servant	NA	NA	DeathBefore31	0
2048	district_15	M	TRUE	327	32	22	Employee	Housewife	80	80	DeathObserved	1
2049	district_15	M	TRUE	335	27	24	Employee	Servant	NA	NA	DeathBefore31	0
2050	district_15	F	TRUE	333	31	27	Worker	Servant	92	92	DeathObserved	1
2051	district_15	M	TRUE	341	40	20	Worker	Worker	NA	NA	DeathBefore31	0
2052	district_15	M	TRUE	323	35	35	Craftsman	Housekeeper	88	88	DeathObserved	1
2053	district_15	M	TRUE	341	34	31	Craftsman	Craftswoman	NA	NA	DeathBefore31	0
2054	district_15	F	TRUE	340	39	23	Worker	Housekeeper	NA	NA	DeathBefore31	0
2055	district_15	M	TRUE	345	31	26	Worker	Worker	52	52	DeathObserved	1
2056	district_15	M	FALSE	348	NA	23	NA	Housekeeper	94	94	DeathObserved	1
2057	district_15	M	TRUE	351	39	33	Employee	Housekeeper	75	75	DeathObserved	1
2058	district_15	M	FALSE	356	NA	19	NA	Craftswoman	84	84	DeathObserved	1
2059	district_15	M	TRUE	363	35	24	Craftsman	Craftswoman	77	77	DeathObserved	1
2060	district_15	M	TRUE	364	33	27	Employee	Housewife	NA	NA	DeathBefore31	0
2061	district_15	M	TRUE	369	29	24	Employee	Housewife	81	81	DeathObserved	1
2062	district_15	M	TRUE	371	27	25	Craftsman	Craftswoman	NA	NA	DeathBefore31	0
2063	district_15	F	TRUE	374	34	21	Employee	Housekeeper	92	92	DeathObserved	1
2064	district_15	F	TRUE	366	35	33	Worker	Servant	86	86	DeathObserved	1
2065	district_15	M	TRUE	375	29	21	Shopkeeper	Shopkeeper	NA	NA	DeathBefore31	0
2066	district_15	M	TRUE	380	39	39	Employee	Housekeeper	52	52	DeathObserved	1
2067	district_15	F	TRUE	388	25	26	Craftsman	Housekeeper	NA	NA	DeathBefore31	0
2068	district_15	F	TRUE	392	29	25	Employee	Housekeeper	NA	NA	DeathBefore31	0
2069	district_15	M	FALSE	392	NA	28	NA	Housewife	40	40	DeathObserved	1
2070	district_15	M	TRUE	390	34	28	Worker	Worker	80	80	DeathObserved	1
2071	district_15	F	TRUE	394	22	27	Craftsman	Craftswoman	75	75	DeathObserved	1
2072	district_15	M	TRUE	394	27	27	Craftsman	Employee	91	91	DeathObserved	1
2073	district_15	F	TRUE	401	39	33	Upper class	Housewife	88	88	DeathObserved	1
2074	district_15	M	TRUE	409	29	21	Craftsman	Housekeeper	67	67	DeathObserved	1
2075	district_15	M	TRUE	414	37	34	Worker	Shopkeeper	NA	NA	DeathBefore31	0
2076	district_15	M	TRUE	419	23	24	Shopkeeper	Servant	81	81	DeathObserved	1
2077	district_15	F	TRUE	422	33	31	Employee	Craftswoman	87	87	DeathObserved	1
2078	district_15	F	TRUE	423	28	31	Employee	Employee	84	84	DeathObserved	1
2079	district_15	M	TRUE	427	30	24	Employee	Craftswoman	74	74	DeathObserved	1
2080	district_15	M	TRUE	433	31	25	Shopkeeper	Shopkeeper	NA	NA	DeathBefore31	0
2081	district_15	M	TRUE	435	26	25	Employee	Craftswoman	71	71	DeathObserved	1
2082	district_15	F	TRUE	446	34	36	Worker	Servant	94	94	DeathObserved	1
2083	district_15	M	TRUE	457	35	27	Worker	Craftswoman	79	79	DeathObserved	1
2084	district_15	M	TRUE	466	24	20	Worker	Worker	NA	NA	DeathBefore31	0
2085	district_15	F	FALSE	470	NA	20	NA	Craftswoman	NA	NA	DeathBefore31	0
2086	district_15	M	TRUE	469	31	22	Employee	Employee	95	95	DeathObserved	1
2087	district_15	F	TRUE	471	30	24	Worker	Worker	77	77	DeathObserved	1
2088	district_15	M	TRUE	484	27	27	Craftsman	Housekeeper	96	96	DeathObserved	1
2089	district_15	F	TRUE	484	23	33	Worker	Employee	NA	NA	DeathBefore31	0
2090	district_15	M	TRUE	496	24	20	Craftsman	Craftswoman	94	94	DeathObserved	1
2091	district_15	F	FALSE	497	NA	23	NA	Servant	NA	NA	DeathBefore31	0
2092	district_15	F	TRUE	504	29	26	Worker	Craftswoman	NA	NA	DeathBefore31	0
2093	district_15	M	TRUE	510	33	31	Shopkeeper	Shopkeeper	NA	NA	DeathBefore31	0
2094	district_15	F	TRUE	513	27	21	Employee	Craftswoman	80	80	DeathObserved	1
2095	district_15	M	TRUE	509	39	31	Craftsman	Worker	NA	NA	DeathBefore31	0
2096	district_15	F	TRUE	523	31	28	Worker	Housekeeper	NA	NA	DeathBefore31	0
2097	district_15	F	TRUE	527	38	34	NA	Worker	84	84	DeathObserved	1
2098	district_15	M	TRUE	536	43	32	Employee	Housewife	88	88	DeathObserved	1
2099	district_15	F	TRUE	538	NA	26	Worker	Craftswoman	NA	NA	DeathBefore31	0
2100	district_15	M	FALSE	554	NA	NA	NA	NA	NA	NA	DeathBefore31	0
2101	district_15	F	TRUE	551	30	22	Employee	Craftswoman	NA	NA	DeathBefore31	0
2102	district_15	F	TRUE	556	25	24	Worker	Craftswoman	85	85	DeathObserved	1
2103	district_15	M	FALSE	559	NA	19	NA	Employee	86	86	DeathObserved	1
2104	district_15	F	TRUE	566	35	33	Employee	Housekeeper	70	70	DeathObserved	1
2105	district_15	M	TRUE	567	23	25	Worker	Housewife	83	83	DeathObserved	1
2106	district_15	M	TRUE	571	30	26	Employee	Housekeeper	NA	NA	DeathBefore31	0
2107	district_15	M	TRUE	575	34	32	Worker	Housewife	69	69	DeathObserved	1
2108	district_15	F	TRUE	583	47	32	Upper class	UpperMiddleClass	73	73	DeathObserved	1
2109	district_15	F	FALSE	584	NA	21	NA	Employee	54	54	DeathObserved	1
2110	district_15	M	TRUE	586	32	24	Worker	Worker	67	67	DeathObserved	1
2111	district_15	M	TRUE	582	48	41	Employee	Housekeeper	49	49	DeathObserved	1
2112	district_15	F	TRUE	579	29	36	Middle class	Craftswoman	NA	NA	DeathBefore31	0
2113	district_15	M	FALSE	587	NA	19	NA	Worker	74	74	DeathObserved	1
2114	district_15	M	FALSE	607	NA	27	NA	Housekeeper	85	85	DeathObserved	1
2115	district_15	F	TRUE	604	29	23	Worker	Worker	NA	NA	DeathBefore31	0
2116	district_15	F	TRUE	608	30	30	Craftsman	Worker	NA	NA	DeathBefore31	0
2117	district_15	F	FALSE	610	NA	21	NA	Worker	64	64	DeathObserved	1
2118	district_15	F	FALSE	610	NA	26	NA	Employee	NA	NA	DeathBefore31	0
2119	district_15	F	TRUE	612	46	25	Upper class	Housewife	96	96	DeathObserved	1
2120	district_15	M	TRUE	613	33	27	Upper class	Housewife	79	79	DeathObserved	1
2121	district_15	F	TRUE	621	34	26	Shopkeeper	Worker	NA	101	Alive99	1
2122	district_15	M	TRUE	621	26	27	Employee	Housekeeper	87	87	DeathObserved	1
2123	district_15	F	TRUE	623	NA	27	Employee	UpperMiddleClass	95	95	DeathObserved	1
2124	district_15	M	TRUE	620	30	27	Employee	Housewife	NA	NA	DeathBefore31	0
2125	district_15	M	TRUE	618	31	23	Worker	NA	NA	NA	DeathBefore31	0
2126	district_15	M	FALSE	622	NA	35	NA	Housekeeper	NA	NA	DeathBefore31	0
2127	district_15	F	TRUE	624	39	33	Worker	Housewife	NA	NA	DeathBefore31	0
2128	district_15	F	TRUE	626	31	32	Employee	Employee	NA	NA	DeathBefore31	0
2129	district_15	M	TRUE	630	NA	30	Worker	Housewife	90	90	DeathObserved	1
2130	district_15	M	TRUE	634	28	24	Employee	Housewife	NA	NA	DeathBefore31	0
2131	district_15	M	TRUE	634	29	36	Worker	Housekeeper	NA	NA	DeathBefore31	0
2132	district_15	M	TRUE	638	34	39	Employee	Housewife	90	90	DeathObserved	1
2133	district_15	M	TRUE	648	25	22	Craftsman	Servant	79	79	DeathObserved	1
2134	district_15	F	TRUE	648	38	26	Employee	Housewife	51	51	DeathObserved	1
2135	district_15	M	TRUE	647	41	33	Employee	Worker	97	97	DeathObserved	1
2136	district_15	F	FALSE	654	NA	23	NA	Housekeeper	NA	NA	DeathBefore31	0
2137	district_15	F	TRUE	653	28	26	Worker	Housewife	84	84	DeathObserved	1
2138	district_15	M	TRUE	654	26	23	Craftsman	Housekeeper	73	73	DeathObserved	1
2139	district_15	F	TRUE	659	35	33	Worker	Worker	93	93	DeathObserved	1
2140	district_15	M	FALSE	658	NA	21	NA	Craftswoman	NA	NA	DeathBefore31	0
2141	district_15	F	FALSE	662	NA	24	NA	Housekeeper	81	81	DeathObserved	1
2142	district_15	F	TRUE	661	23	23	Worker	Servant	90	90	DeathObserved	1
2143	district_15	M	TRUE	660	32	29	Worker	Housekeeper	NA	NA	DeathBefore31	0
2144	district_15	M	TRUE	659	41	37	Shopkeeper	Shopkeeper	72	72	DeathObserved	1
2145	district_15	F	TRUE	663	32	31	Worker	Craftswoman	98	98	DeathObserved	1
2146	district_15	F	TRUE	665	27	20	Worker	Servant	49	49	DeathObserved	1
2147	district_15	M	TRUE	676	34	26	Employee	Craftswoman	72	72	DeathObserved	1
2148	district_15	F	TRUE	680	34	36	Middle class	Craftswoman	97	97	DeathObserved	1
2149	district_15	F	TRUE	675	32	28	Craftsman	Housekeeper	78	78	DeathObserved	1
2150	district_15	M	TRUE	687	34	32	Worker	Housewife	62	62	DeathObserved	1
2151	district_15	M	FALSE	687	NA	29	NA	Housekeeper	67	67	DeathObserved	1
2152	district_15	M	TRUE	690	26	22	Employee	Employee	NA	NA	DeathBefore31	0
2153	district_15	M	TRUE	692	23	25	Worker	Craftswoman	81	81	DeathObserved	1
2154	district_15	F	TRUE	698	35	32	Craftsman	Servant	92	92	DeathObserved	1
2155	district_15	F	TRUE	702	38	37	Worker	Craftswoman	85	85	DeathObserved	1
2156	district_15	F	TRUE	703	27	20	Shopkeeper	Craftswoman	NA	NA	DeathBefore31	0
2157	district_15	F	TRUE	691	32	31	Worker	Housekeeper	NA	NA	DeathBefore31	0
2158	district_15	M	FALSE	706	NA	21	NA	Worker	NA	NA	DeathBefore31	0
2159	district_15	M	TRUE	712	22	22	Worker	Housewife	NA	NA	DeathBefore31	0
2160	district_15	F	FALSE	716	NA	24	NA	Craftswoman	85	85	DeathObserved	1
2161	district_15	F	TRUE	714	36	31	Middle class	Housewife	94	94	DeathObserved	1
2162	district_15	F	TRUE	721	46	28	Worker	Housewife	64	64	DeathObserved	1
2163	district_15	F	TRUE	728	27	26	Craftsman	Housekeeper	NA	101	Alive99	1
2164	district_15	M	TRUE	730	34	26	Employee	Housekeeper	65	65	DeathObserved	1
2165	district_15	F	FALSE	731	NA	29	NA	Housekeeper	NA	NA	DeathBefore31	0
2166	district_15	F	FALSE	725	NA	20	NA	Craftswoman	84	84	DeathObserved	1
2167	district_15	F	FALSE	737	NA	21	NA	Housewife	NA	NA	DeathBefore31	0
2168	district_15	F	TRUE	740	28	25	Worker	Worker	66	66	DeathObserved	1
2169	district_15	F	FALSE	740	NA	25	NA	Servant	92	92	DeathObserved	1
2170	district_15	M	TRUE	743	39	34	Employee	Housewife	91	91	DeathObserved	1
2171	district_15	F	TRUE	745	28	28	Employee	Housewife	NA	NA	DeathBefore31	0
2172	district_15	M	TRUE	749	28	23	Employee	Housekeeper	80	80	DeathObserved	1
2173	district_15	M	TRUE	749	24	25	Employee	Housewife	61	61	DeathObserved	1
2174	district_15	F	TRUE	749	40	39	Craftsman	Housekeeper	NA	NA	DeathBefore31	0
2175	district_15	M	TRUE	754	27	24	Craftsman	Housekeeper	92	92	DeathObserved	1
2176	district_15	M	TRUE	751	28	23	Worker	Craftswoman	97	97	DeathObserved	1
2177	district_15	F	TRUE	754	23	33	Worker	Worker	84	84	DeathObserved	1
2178	district_15	F	TRUE	753	24	23	Craftsman	Housekeeper	74	74	DeathObserved	1
2179	district_15	M	TRUE	757	29	26	Employee	Craftswoman	57	57	DeathObserved	1
2180	district_15	F	TRUE	757	31	30	Employee	Worker	62	62	DeathObserved	1
2181	district_15	M	FALSE	765	NA	20	NA	Craftswoman	NA	NA	DeathBefore31	0
2182	district_15	M	FALSE	764	NA	35	NA	Worker	78	78	DeathObserved	1
2183	district_15	M	TRUE	766	31	26	Craftsman	Servant	NA	NA	DeathBefore31	0
2184	district_15	M	TRUE	769	25	21	Craftsman	Craftswoman	83	83	DeathObserved	1
2185	district_15	M	TRUE	765	31	30	Middle class	Housewife	71	71	DeathObserved	1
2186	district_15	M	TRUE	777	25	30	Craftsman	Worker	57	57	DeathObserved	1
2187	district_15	M	FALSE	782	NA	22	NA	Craftswoman	80	80	DeathObserved	1
2188	district_15	M	TRUE	788	27	26	Craftsman	Housewife	57	57	DeathObserved	1
2189	district_15	M	TRUE	782	28	22	Craftsman	Shopkeeper	76	76	DeathObserved	1
2190	district_15	M	FALSE	781	NA	20	NA	Worker	91	91	DeathObserved	1
2191	district_15	M	TRUE	789	33	26	Craftsman	Worker	NA	NA	DeathBefore31	0
2192	district_15	M	TRUE	785	31	29	Worker	Craftswoman	63	63	DeathObserved	1
2193	district_15	M	TRUE	791	38	28	Employee	Housewife	96	96	DeathObserved	1
2194	district_15	M	TRUE	791	32	24	Worker	Craftswoman	82	82	DeathObserved	1
2195	district_15	M	TRUE	796	30	25	Craftsman	Worker	NA	NA	DeathBefore31	0
2196	district_15	F	TRUE	800	42	36	Shopkeeper	Shopkeeper	NA	NA	DeathBefore31	0
2197	district_15	M	TRUE	799	31	29	Craftsman	Craftswoman	NA	NA	DeathBefore31	0
2198	district_15	F	TRUE	807	22	20	Craftsman	Employee	85	85	DeathObserved	1
2199	district_15	M	FALSE	807	NA	23	NA	Housewife	NA	NA	DeathBefore31	0
2200	district_15	F	TRUE	810	26	24	Craftsman	Housewife	83	83	DeathObserved	1
2201	district_15	F	TRUE	811	31	22	Worker	Housekeeper	87	87	DeathObserved	1
2202	district_15	F	FALSE	813	NA	29	NA	Craftswoman	NA	NA	DeathBefore31	0
2203	district_15	M	FALSE	815	NA	27	NA	Craftswoman	92	92	DeathObserved	1
2204	district_15	F	TRUE	823	22	22	Employee	Craftswoman	NA	NA	DeathBefore31	0
2205	district_15	M	TRUE	828	48	31	Worker	Shopkeeper	63	63	DeathObserved	1
2206	district_15	F	TRUE	832	28	26	Employee	Housewife	88	88	DeathObserved	1
2207	district_15	M	TRUE	843	44	24	Shopkeeper	Shopkeeper	69	69	DeathObserved	1
2208	district_15	F	TRUE	844	32	28	Upper class	Housewife	NA	NA	DeathBefore31	0
2209	district_15	M	TRUE	846	26	26	Worker	Craftswoman	86	86	DeathObserved	1
2210	district_15	M	FALSE	847	NA	22	NA	Employee	NA	NA	DeathBefore31	0
2211	district_15	M	FALSE	849	NA	22	NA	Housekeeper	48	48	DeathObserved	1
2212	district_15	M	TRUE	853	25	24	Shopkeeper	Worker	NA	NA	DeathBefore31	0
2213	district_15	F	TRUE	861	23	23	Employee	Housewife	NA	NA	DeathBefore31	0
2214	district_15	M	TRUE	867	41	30	Worker	Worker	NA	NA	DeathBefore31	0
2215	district_15	M	TRUE	871	25	22	Worker	Craftswoman	76	76	DeathObserved	1
2216	district_15	M	TRUE	871	31	30	Employee	Servant	85	85	DeathObserved	1
2217	district_15	F	FALSE	873	NA	21	NA	Servant	91	91	DeathObserved	1
2218	district_15	M	TRUE	878	29	25	Employee	Housewife	70	70	DeathObserved	1
2219	district_15	M	TRUE	878	NA	23	Worker	Worker	NA	NA	DeathBefore31	0
2472	district_12	M	FALSE	1	NA	23	NA	Servant	NA	NA	DeathBefore31	0
2473	district_12	M	FALSE	1	NA	20	NA	Servant	NA	NA	DeathBefore31	0
2474	district_12	M	TRUE	1	27	23	Employee	Employee	NA	101	Alive99	1
2475	district_12	M	TRUE	1	29	29	Craftsman	Craftswoman	59	59	DeathObserved	1
2476	district_12	F	FALSE	2	NA	18	NA	Housewife	NA	NA	DeathBefore31	0
2477	district_12	F	FALSE	4	NA	20	NA	Craftswoman	NA	NA	DeathBefore31	0
2478	district_12	F	TRUE	2	35	26	Employee	Employee	85	85	DeathObserved	1
2479	district_12	F	FALSE	3	NA	27	NA	Housewife	NA	NA	DeathBefore31	0
2480	district_12	M	FALSE	3	NA	23	NA	Servant	79	79	DeathObserved	1
2481	district_12	F	TRUE	4	26	24	Craftsman	Housekeeper	94	94	DeathObserved	1
2482	district_12	M	FALSE	2	NA	32	NA	UpperMiddleClass	NA	NA	DeathBefore31	0
2483	district_12	M	TRUE	5	33	30	Employee	Housekeeper	74	74	DeathObserved	1
2484	district_12	F	FALSE	5	NA	23	NA	Craftswoman	NA	NA	DeathBefore31	0
2485	district_12	F	FALSE	5	NA	29	NA	Craftswoman	91	91	DeathObserved	1
2486	district_12	F	TRUE	6	28	22	Employee	Worker	89	89	DeathObserved	1
2487	district_12	M	TRUE	8	27	20	Worker	Servant	NA	NA	DeathBefore31	0
2488	district_12	M	TRUE	5	40	34	Worker	Housewife	69	69	DeathObserved	1
2489	district_12	F	TRUE	6	31	24	Craftsman	Housewife	95	95	DeathObserved	1
2490	district_12	F	TRUE	6	31	23	Employee	Housewife	74	74	DeathObserved	1
2491	district_12	M	TRUE	8	23	21	Middle class	Worker	86	86	DeathObserved	1
2492	district_12	F	TRUE	8	26	25	Employee	Employee	NA	NA	DeathBefore31	0
2493	district_12	M	FALSE	8	NA	33	NA	Servant	80	80	DeathObserved	1
2494	district_12	M	FALSE	6	NA	30	NA	Worker	NA	NA	DeathBefore31	0
2495	district_12	F	TRUE	11	29	24	Employee	Housewife	NA	NA	DeathBefore31	0
2496	district_12	F	FALSE	11	NA	22	NA	Servant	77	77	DeathObserved	1
2497	district_12	M	TRUE	12	28	24	Employee	Housekeeper	70	70	DeathObserved	1
2498	district_12	M	FALSE	12	NA	24	NA	NA	58	58	DeathObserved	1
2499	district_12	F	TRUE	11	33	33	Worker	Housewife	89	89	DeathObserved	1
2500	district_12	M	TRUE	13	29	24	Worker	Housekeeper	NA	NA	DeathBefore31	0
2501	district_12	F	TRUE	13	36	30	Craftsman	Housekeeper	94	94	DeathObserved	1
2502	district_12	M	FALSE	13	NA	40	NA	Servant	78	78	DeathObserved	1
2503	district_12	F	FALSE	14	NA	26	NA	Servant	NA	NA	DeathBefore31	0
2504	district_12	F	TRUE	15	27	23	Worker	Employee	84	84	DeathObserved	1
2505	district_12	M	TRUE	16	24	22	Worker	Servant	70	70	DeathObserved	1
2506	district_12	M	FALSE	15	NA	23	NA	Housekeeper	35	35	DeathObserved	1
2507	district_12	F	FALSE	16	NA	23	NA	Servant	NA	NA	DeathBefore31	0
2508	district_12	M	TRUE	14	33	25	Worker	Worker	NA	NA	DeathBefore31	0
2509	district_12	M	TRUE	18	47	23	Employee	Housekeeper	51	51	DeathObserved	1
2510	district_12	F	TRUE	17	26	28	Craftsman	Housekeeper	34	34	DeathObserved	1
2511	district_12	F	TRUE	17	41	37	Shopkeeper	Worker	90	90	DeathObserved	1
2512	district_12	M	TRUE	11	38	34	Employee	Housekeeper	NA	101	Alive99	1
2513	district_12	F	FALSE	18	NA	27	NA	Craftswoman	89	89	DeathObserved	1
2514	district_12	M	TRUE	22	23	30	Employee	Employee	76	76	DeathObserved	1
2515	district_12	F	FALSE	22	NA	25	NA	Servant	71	71	DeathObserved	1
2516	district_12	F	FALSE	20	NA	27	NA	Housekeeper	NA	NA	DeathBefore31	0
2517	district_12	M	TRUE	13	54	41	Worker	Housekeeper	86	86	DeathObserved	1
2518	district_12	F	TRUE	22	26	26	Shopkeeper	Shopkeeper	89	89	DeathObserved	1
2519	district_12	M	FALSE	22	NA	21	NA	Servant	NA	NA	DeathBefore31	0
2520	district_12	F	TRUE	26	33	25	Employee	Employee	86	86	DeathObserved	1
2521	district_12	F	FALSE	21	NA	16	NA	Shopkeeper	NA	NA	DeathBefore31	0
2522	district_12	F	TRUE	24	31	29	Employee	Housewife	51	51	DeathObserved	1
2523	district_12	M	TRUE	25	28	26	Worker	Worker	81	81	DeathObserved	1
2524	district_12	M	FALSE	27	NA	20	NA	Craftswoman	90	90	DeathObserved	1
2525	district_12	M	FALSE	30	NA	22	NA	Worker	78	78	DeathObserved	1
2526	district_12	M	TRUE	26	25	21	Employee	Craftswoman	88	88	DeathObserved	1
2527	district_12	F	TRUE	31	30	26	Craftsman	Housekeeper	63	63	DeathObserved	1
2528	district_12	F	TRUE	30	51	39	Worker	Housewife	87	87	DeathObserved	1
2529	district_12	F	TRUE	30	27	27	Shopkeeper	Shopkeeper	84	84	DeathObserved	1
2530	district_12	M	TRUE	31	25	21	Worker	Shopkeeper	NA	101	Alive99	1
2531	district_12	F	FALSE	30	NA	22	NA	Servant	NA	NA	DeathBefore31	0
2532	district_12	F	FALSE	30	NA	28	NA	Craftswoman	NA	NA	DeathBefore31	0
2533	district_12	M	TRUE	33	25	20	Craftsman	Worker	75	75	DeathObserved	1
2534	district_12	F	FALSE	32	NA	20	NA	Servant	NA	NA	DeathBefore31	0
2535	district_12	M	TRUE	33	21	18	Craftsman	Worker	NA	101	Alive99	1
2536	district_12	M	TRUE	31	20	18	Craftsman	Craftswoman	NA	NA	DeathBefore31	0
2537	district_12	M	TRUE	33	30	22	Employee	Housekeeper	87	87	DeathObserved	1
2538	district_12	M	FALSE	33	NA	21	NA	Housekeeper	83	83	DeathObserved	1
2539	district_12	F	TRUE	33	37	23	Worker	Worker	91	91	DeathObserved	1
2540	district_12	F	FALSE	34	NA	25	NA	Worker	NA	NA	DeathBefore31	0
2541	district_12	F	TRUE	35	32	31	Employee	Servant	97	97	DeathObserved	1
2542	district_12	M	TRUE	40	36	29	Craftsman	Housewife	80	80	DeathObserved	1
2543	district_12	M	TRUE	37	35	33	Employee	Servant	84	84	DeathObserved	1
2544	district_12	M	TRUE	38	22	30	Worker	Housekeeper	65	65	DeathObserved	1
2545	district_12	M	TRUE	41	28	23	Employee	Servant	48	48	DeathObserved	1
2546	district_12	M	TRUE	40	24	18	Craftsman	Shopkeeper	32	32	DeathObserved	1
2547	district_12	M	FALSE	41	NA	30	NA	Employee	66	66	DeathObserved	1
2548	district_12	M	TRUE	42	34	28	Upper class	Housewife	56	56	DeathObserved	1
2549	district_12	M	FALSE	42	NA	28	NA	Employee	NA	NA	DeathBefore31	0
2550	district_12	F	TRUE	44	33	26	Employee	Employee	76	76	DeathObserved	1
2551	district_12	F	TRUE	42	37	28	Craftsman	Craftswoman	90	90	DeathObserved	1
2552	district_12	F	TRUE	41	27	18	Craftsman	Housewife	96	96	DeathObserved	1
2553	district_12	F	FALSE	46	NA	26	NA	Servant	NA	101	Alive99	1
2554	district_12	M	TRUE	44	33	30	Upper class	Housewife	66	66	DeathObserved	1
2555	district_12	M	TRUE	44	40	27	Employee	Craftswoman	92	92	DeathObserved	1
2556	district_12	M	FALSE	45	NA	24	NA	Craftswoman	NA	NA	DeathBefore31	0
2557	district_12	F	TRUE	48	54	32	Shopkeeper	Housekeeper	83	83	DeathObserved	1
2558	district_12	F	TRUE	48	35	25	Craftsman	Craftswoman	NA	NA	DeathBefore31	0
2559	district_12	F	FALSE	48	NA	22	NA	Housekeeper	NA	NA	DeathBefore31	0
2560	district_12	F	FALSE	49	NA	20	NA	Servant	NA	101	Alive99	1
2561	district_12	M	TRUE	50	30	24	Craftsman	Craftswoman	73	73	DeathObserved	1
2562	district_12	F	FALSE	50	NA	19	NA	Servant	NA	NA	DeathBefore31	0
2563	district_12	M	TRUE	50	34	29	Employee	Worker	73	73	DeathObserved	1
2564	district_12	F	TRUE	51	35	28	Worker	Housekeeper	NA	NA	DeathBefore31	0
2565	district_12	F	TRUE	52	27	23	Middle class	Servant	85	85	DeathObserved	1
2566	district_12	M	TRUE	54	30	25	Shopkeeper	Housewife	77	77	DeathObserved	1
2567	district_12	F	TRUE	55	30	29	Worker	Housewife	NA	NA	DeathBefore31	0
2568	district_12	F	FALSE	57	NA	25	NA	Craftswoman	NA	NA	DeathBefore31	0
2569	district_12	F	TRUE	55	23	19	Employee	Employee	NA	NA	DeathBefore31	0
2570	district_12	M	TRUE	55	52	31	Employee	Housewife	NA	NA	DeathBefore31	0
2571	district_12	F	TRUE	57	34	26	Craftsman	Servant	77	77	DeathObserved	1
2572	district_12	F	TRUE	57	35	31	Worker	Servant	NA	NA	DeathBefore31	0
2573	district_12	F	FALSE	55	NA	34	NA	Employee	89	89	DeathObserved	1
2574	district_12	M	TRUE	58	31	31	Upper class	UpperMiddleClass	NA	101	Alive99	1
2575	district_12	F	TRUE	56	31	31	Worker	Craftswoman	96	96	DeathObserved	1
2576	district_12	F	TRUE	54	33	33	Craftsman	Housewife	NA	NA	DeathBefore31	0
2577	district_12	F	FALSE	61	NA	27	NA	Servant	NA	NA	DeathBefore31	0
2578	district_12	M	TRUE	61	21	20	Employee	Housewife	62	62	DeathObserved	1
2579	district_12	M	TRUE	62	20	20	Shopkeeper	Housekeeper	NA	NA	DeathBefore31	0
2580	district_12	F	TRUE	62	20	20	Craftsman	Worker	86	86	DeathObserved	1
2581	district_12	M	TRUE	63	29	28	Worker	Housewife	NA	NA	DeathBefore31	0
2582	district_12	F	TRUE	63	28	21	Worker	Servant	NA	101	Alive99	1
2583	district_12	M	TRUE	66	23	19	Worker	Housekeeper	NA	NA	DeathBefore31	0
2584	district_12	M	TRUE	66	31	30	Craftsman	Housewife	97	97	DeathObserved	1
2585	district_12	M	FALSE	68	NA	21	NA	Employee	NA	NA	DeathBefore31	0
2586	district_12	M	TRUE	68	31	26	Worker	Housekeeper	NA	NA	DeathBefore31	0
2587	district_12	M	TRUE	68	34	29	Employee	Servant	91	91	DeathObserved	1
2588	district_12	F	FALSE	70	NA	24	NA	Servant	86	86	DeathObserved	1
2589	district_12	F	TRUE	67	24	26	NA	Housewife	NA	NA	DeathBefore31	0
2590	district_12	M	TRUE	68	38	33	Employee	Employee	64	64	DeathObserved	1
2591	district_12	F	TRUE	71	29	20	Worker	Housekeeper	94	94	DeathObserved	1
2592	district_12	F	TRUE	72	31	25	Upper class	Housewife	78	78	DeathObserved	1
2593	district_12	F	FALSE	72	NA	30	NA	Servant	NA	NA	DeathBefore31	0
2594	district_12	F	TRUE	71	26	24	Employee	Craftswoman	NA	NA	DeathBefore31	0
2595	district_12	M	TRUE	71	27	23	Employee	Housewife	89	89	DeathObserved	1
2596	district_12	F	TRUE	66	28	22	Worker	Housewife	NA	NA	DeathBefore31	0
2597	district_12	F	TRUE	73	27	20	Worker	Craftswoman	NA	NA	DeathBefore31	0
2598	district_12	M	TRUE	73	29	26	Employee	Housewife	94	94	DeathObserved	1
2599	district_12	M	TRUE	74	29	28	Employee	Housekeeper	90	90	DeathObserved	1
2600	district_12	F	TRUE	75	26	28	Worker	Worker	NA	NA	DeathBefore31	0
2601	district_12	F	TRUE	75	29	21	Shopkeeper	Shopkeeper	84	84	DeathObserved	1
2602	district_12	M	TRUE	76	31	23	Craftsman	Worker	91	91	DeathObserved	1
2603	district_12	F	TRUE	75	37	34	Employee	Servant	NA	NA	DeathBefore31	0
2604	district_12	M	TRUE	77	36	36	Worker	Housewife	NA	NA	DeathBefore31	0
2605	district_12	M	TRUE	78	26	23	Craftsman	Housewife	69	69	DeathObserved	1
2606	district_12	F	TRUE	81	33	25	Employee	Housewife	71	71	DeathObserved	1
2607	district_12	M	FALSE	78	NA	20	NA	Shopkeeper	33	33	DeathObserved	1
2608	district_12	M	TRUE	82	33	41	Employee	Housewife	79	79	DeathObserved	1
2609	district_12	F	FALSE	81	NA	19	NA	Housekeeper	NA	NA	DeathBefore31	0
2610	district_12	M	FALSE	81	NA	22	NA	Servant	67	67	DeathObserved	1
2611	district_12	M	FALSE	82	NA	24	NA	Craftswoman	74	74	DeathObserved	1
2612	district_12	M	TRUE	81	36	32	Worker	Worker	76	76	DeathObserved	1
2613	district_12	M	TRUE	79	29	31	Worker	Housekeeper	84	84	DeathObserved	1
2614	district_12	F	FALSE	85	NA	19	NA	Shopkeeper	NA	NA	DeathBefore31	0
2615	district_12	M	TRUE	85	24	25	Craftsman	Craftswoman	53	53	DeathObserved	1
2616	district_12	F	TRUE	86	34	26	Employee	Worker	95	95	DeathObserved	1
2617	district_12	F	FALSE	89	NA	22	NA	Craftswoman	NA	101	Alive99	1
2618	district_12	F	TRUE	89	24	27	Craftsman	Craftswoman	NA	NA	DeathBefore31	0
2619	district_12	M	TRUE	85	39	32	Craftsman	Craftswoman	70	70	DeathObserved	1
2620	district_12	F	TRUE	90	28	24	Employee	Employee	NA	NA	DeathBefore31	0
2621	district_12	M	FALSE	89	NA	25	NA	Shopkeeper	79	79	DeathObserved	1
2622	district_12	F	FALSE	90	NA	30	NA	Housekeeper	91	91	DeathObserved	1
2623	district_12	F	TRUE	89	33	27	Craftsman	Housewife	34	34	DeathObserved	1
2624	district_12	M	TRUE	93	27	23	Employee	Craftswoman	76	76	DeathObserved	1
2625	district_12	F	TRUE	95	24	24	Shopkeeper	Craftswoman	83	83	DeathObserved	1
2626	district_12	M	FALSE	97	NA	19	NA	Worker	NA	NA	DeathBefore31	0
2627	district_12	F	TRUE	95	34	28	Worker	Housewife	97	97	DeathObserved	1
2628	district_12	M	TRUE	95	33	25	Craftsman	Housekeeper	73	73	DeathObserved	1
2629	district_12	M	FALSE	95	NA	22	NA	Craftswoman	64	64	DeathObserved	1
2630	district_12	M	TRUE	97	23	19	Employee	Craftswoman	78	78	DeathObserved	1
2631	district_12	F	TRUE	96	53	19	Employee	Craftswoman	90	90	DeathObserved	1
2632	district_12	F	TRUE	98	35	26	Upper class	Housewife	NA	NA	DeathBefore31	0
2633	district_12	F	FALSE	99	NA	18	NA	Servant	68	68	DeathObserved	1
2634	district_12	M	TRUE	98	26	34	Shopkeeper	Housewife	NA	NA	DeathBefore31	0
2635	district_12	F	FALSE	99	NA	25	NA	Craftswoman	61	61	DeathObserved	1
2636	district_12	M	FALSE	100	NA	28	NA	Craftswoman	NA	NA	DeathBefore31	0
2637	district_12	F	TRUE	102	31	28	Worker	Housekeeper	98	98	DeathObserved	1
2638	district_12	F	FALSE	103	NA	23	NA	Craftswoman	73	73	DeathObserved	1
2639	district_12	M	TRUE	103	37	34	Middle class	Housewife	76	76	DeathObserved	1
2640	district_12	F	TRUE	105	28	19	Employee	Housekeeper	54	54	DeathObserved	1
2641	district_12	F	TRUE	106	29	28	Employee	Servant	NA	NA	DeathBefore31	0
2642	district_12	M	TRUE	105	29	25	Shopkeeper	Housewife	91	91	DeathObserved	1
2643	district_12	F	FALSE	106	NA	22	NA	Servant	NA	NA	DeathBefore31	0
2644	district_12	F	FALSE	107	NA	22	NA	Servant	NA	101	Alive99	1
2645	district_12	F	TRUE	105	30	25	Employee	Housekeeper	NA	NA	DeathBefore31	0
2646	district_12	F	TRUE	108	28	24	Employee	Housewife	92	92	DeathObserved	1
2647	district_12	F	TRUE	104	29	32	Employee	Housewife	NA	NA	DeathBefore31	0
2648	district_12	M	TRUE	107	39	26	Worker	Housewife	68	68	DeathObserved	1
2649	district_12	M	TRUE	108	27	27	Craftsman	Housewife	81	81	DeathObserved	1
2650	district_12	F	TRUE	107	26	20	Worker	Worker	NA	NA	DeathBefore31	0
2651	district_12	M	TRUE	109	36	29	Employee	Servant	NA	NA	DeathBefore31	0
2652	district_12	F	FALSE	113	NA	18	NA	Employee	NA	NA	DeathBefore31	0
2653	district_12	F	TRUE	112	36	33	Worker	Servant	90	90	DeathObserved	1
2654	district_12	M	TRUE	111	36	33	Shopkeeper	Housekeeper	NA	NA	DeathBefore31	0
2655	district_12	F	TRUE	113	24	22	Worker	Craftswoman	93	93	DeathObserved	1
2656	district_12	M	TRUE	115	36	30	Worker	Worker	NA	NA	DeathBefore31	0
2657	district_12	M	TRUE	115	25	27	Craftsman	Housewife	NA	NA	DeathBefore31	0
2658	district_12	F	TRUE	116	27	26	Middle class	Craftswoman	73	73	DeathObserved	1
2659	district_12	M	TRUE	114	33	29	Upper class	Housewife	NA	NA	DeathBefore31	0
2660	district_12	F	TRUE	118	28	23	Employee	Worker	NA	NA	DeathBefore31	0
2661	district_12	F	TRUE	118	29	25	Craftsman	Craftswoman	86	86	DeathObserved	1
2662	district_12	M	TRUE	116	25	20	Employee	Servant	88	88	DeathObserved	1
2663	district_12	M	TRUE	120	24	20	Worker	Employee	65	65	DeathObserved	1
2664	district_12	F	TRUE	120	33	29	Worker	Housewife	NA	NA	DeathBefore31	0
2665	district_12	M	TRUE	121	27	27	Worker	Housewife	NA	NA	DeathBefore31	0
2666	district_12	F	FALSE	121	34	28	NA	Housekeeper	90	90	DeathObserved	1
2667	district_12	F	FALSE	121	NA	39	NA	Worker	97	97	DeathObserved	1
2668	district_12	M	TRUE	120	30	25	Craftsman	Employee	NA	NA	DeathBefore31	0
2669	district_12	F	TRUE	121	26	21	Worker	Worker	NA	NA	DeathBefore31	0
2670	district_12	M	TRUE	119	25	23	Worker	Shopkeeper	65	65	DeathObserved	1
2671	district_12	M	FALSE	121	NA	19	NA	Housekeeper	NA	NA	DeathBefore31	0
2672	district_12	M	FALSE	125	NA	27	NA	Craftswoman	66	66	DeathObserved	1
2673	district_12	F	TRUE	127	27	21	Employee	Servant	85	85	DeathObserved	1
2674	district_12	F	FALSE	128	NA	27	NA	Employee	NA	NA	DeathBefore31	0
2675	district_12	F	TRUE	128	25	21	Employee	Craftswoman	90	90	DeathObserved	1
2676	district_12	F	TRUE	130	24	22	Worker	Servant	NA	101	Alive99	1
2677	district_12	M	FALSE	131	NA	25	NA	Servant	NA	NA	DeathBefore31	0
2678	district_12	M	FALSE	131	NA	32	NA	Servant	84	84	DeathObserved	1
2679	district_12	M	TRUE	126	32	27	Employee	Servant	91	91	DeathObserved	1
2680	district_12	M	TRUE	133	25	25	Shopkeeper	Craftswoman	86	86	DeathObserved	1
2681	district_12	F	TRUE	133	25	20	Craftsman	Worker	88	88	DeathObserved	1
2682	district_12	M	TRUE	130	26	21	Employee	Worker	83	83	DeathObserved	1
2683	district_12	F	TRUE	133	36	34	Worker	Housewife	84	84	DeathObserved	1
2684	district_12	F	TRUE	134	35	33	Employee	Craftswoman	88	88	DeathObserved	1
2685	district_12	M	TRUE	135	27	26	Employee	Housekeeper	65	65	DeathObserved	1
2686	district_12	F	TRUE	136	28	27	Craftsman	Worker	63	63	DeathObserved	1
2687	district_12	M	FALSE	135	NA	23	NA	Employee	NA	NA	DeathBefore31	0
2688	district_12	M	TRUE	136	35	32	Worker	Servant	72	72	DeathObserved	1
2689	district_12	M	FALSE	137	NA	24	NA	Servant	NA	NA	DeathBefore31	0
2690	district_12	F	TRUE	139	27	27	Worker	Craftswoman	NA	NA	DeathBefore31	0
2691	district_12	M	FALSE	139	NA	21	NA	Servant	78	78	DeathObserved	1
2692	district_12	M	FALSE	137	NA	37	NA	Craftswoman	55	55	DeathObserved	1
2693	district_12	M	TRUE	141	28	24	Upper class	Housewife	NA	NA	DeathBefore31	0
2694	district_12	F	FALSE	143	NA	19	NA	Servant	NA	NA	DeathBefore31	0
2695	district_12	F	TRUE	141	31	28	Worker	Housewife	NA	101	Alive99	1
2696	district_12	M	TRUE	143	30	27	Upper class	Employee	73	73	DeathObserved	1
2697	district_12	F	FALSE	144	NA	18	NA	Worker	NA	NA	DeathBefore31	0
2698	district_12	F	FALSE	146	NA	22	NA	Servant	NA	NA	DeathBefore31	0
2699	district_12	M	TRUE	148	31	26	Employee	Servant	NA	NA	DeathBefore31	0
2700	district_12	F	TRUE	146	38	33	Shopkeeper	Employee	NA	NA	DeathBefore31	0
2701	district_12	F	TRUE	145	28	29	Worker	Servant	NA	NA	DeathBefore31	0
2702	district_12	F	TRUE	150	38	33	Shopkeeper	Housekeeper	85	85	DeathObserved	1
2703	district_12	M	TRUE	148	29	20	Worker	Employee	NA	NA	DeathBefore31	0
2704	district_12	M	TRUE	147	24	22	Worker	Housewife	68	68	DeathObserved	1
2705	district_12	M	TRUE	146	26	26	Employee	Servant	NA	NA	DeathBefore31	0
2706	district_12	F	TRUE	151	35	30	Craftsman	NA	60	60	DeathObserved	1
2707	district_12	F	TRUE	151	32	28	Employee	Servant	NA	NA	DeathBefore31	0
2708	district_12	M	TRUE	151	24	26	Shopkeeper	Craftswoman	66	66	DeathObserved	1
2709	district_12	F	TRUE	152	25	25	Employee	Housewife	NA	NA	DeathBefore31	0
2710	district_12	M	FALSE	153	NA	31	NA	Craftswoman	NA	NA	DeathBefore31	0
2711	district_12	M	TRUE	153	25	20	Shopkeeper	Servant	51	51	DeathObserved	1
2712	district_12	F	FALSE	154	NA	25	NA	Servant	NA	NA	DeathBefore31	0
2713	district_12	M	TRUE	153	34	26	Craftsman	Employee	NA	NA	DeathBefore31	0
2714	district_12	M	TRUE	155	48	32	Middle class	Housewife	NA	NA	DeathBefore31	0
2715	district_12	F	TRUE	153	24	22	Shopkeeper	Craftswoman	42	42	DeathObserved	1
2716	district_12	F	TRUE	157	25	20	Worker	Worker	NA	NA	DeathBefore31	0
2717	district_12	F	TRUE	156	27	25	Employee	Housewife	92	92	DeathObserved	1
2718	district_12	F	FALSE	155	NA	22	NA	UpperMiddleClass	78	78	DeathObserved	1
2719	district_12	F	TRUE	158	25	20	Craftsman	Worker	69	69	DeathObserved	1
2720	district_12	F	FALSE	156	NA	26	NA	Employee	95	95	DeathObserved	1
2721	district_12	F	TRUE	158	26	26	Worker	Craftswoman	69	69	DeathObserved	1
2722	district_12	F	TRUE	160	31	33	Worker	Worker	NA	NA	DeathBefore31	0
2723	district_12	M	FALSE	157	NA	18	NA	Worker	NA	NA	DeathBefore31	0
2724	district_12	F	FALSE	158	NA	24	NA	Worker	NA	NA	DeathBefore31	0
2725	district_12	F	FALSE	163	NA	18	NA	Servant	86	86	DeathObserved	1
2726	district_12	F	FALSE	161	NA	19	NA	Servant	74	74	DeathObserved	1
2727	district_12	F	TRUE	157	48	39	Worker	NA	46	46	DeathObserved	1
2728	district_12	F	TRUE	161	26	20	Middle class	Housekeeper	71	71	DeathObserved	1
2729	district_12	M	TRUE	161	36	27	Employee	Housekeeper	NA	NA	DeathBefore31	0
2730	district_12	M	FALSE	163	NA	22	NA	Servant	NA	NA	DeathBefore31	0
2731	district_12	F	TRUE	163	30	25	Employee	Employee	82	82	DeathObserved	1
2732	district_12	M	TRUE	163	32	30	Employee	Employee	NA	NA	DeathBefore31	0
2733	district_12	F	TRUE	165	26	19	Worker	Housewife	60	60	DeathObserved	1
2734	district_12	M	TRUE	164	41	35	Craftsman	Housekeeper	NA	NA	DeathBefore31	0
2735	district_12	M	TRUE	164	27	24	Worker	Employee	64	64	DeathObserved	1
2736	district_12	F	TRUE	166	34	30	Worker	Shopkeeper	NA	NA	DeathBefore31	0
2737	district_12	F	TRUE	166	24	23	Employee	Housekeeper	79	79	DeathObserved	1
2738	district_12	M	TRUE	168	34	24	Worker	Craftswoman	NA	NA	DeathBefore31	0
2739	district_12	M	TRUE	168	35	29	Employee	Housewife	88	88	DeathObserved	1
2740	district_12	M	FALSE	167	NA	20	NA	Servant	NA	NA	DeathBefore31	0
2741	district_12	F	TRUE	168	27	26	Employee	Housewife	65	65	DeathObserved	1
2742	district_12	F	TRUE	170	39	31	Middle class	Housewife	75	75	DeathObserved	1
2743	district_12	F	TRUE	173	36	35	Shopkeeper	Housewife	64	64	DeathObserved	1
2744	district_12	M	TRUE	169	48	33	Employee	Housewife	74	74	DeathObserved	1
2745	district_12	F	TRUE	172	27	24	Worker	Housekeeper	33	33	DeathObserved	1
2746	district_12	F	FALSE	175	NA	18	NA	Worker	63	63	DeathObserved	1
2747	district_12	M	TRUE	175	40	26	Worker	Housewife	NA	NA	DeathBefore31	0
2748	district_12	M	TRUE	172	30	29	Craftsman	Housekeeper	73	73	DeathObserved	1
2749	district_12	F	TRUE	175	34	34	Worker	Housekeeper	NA	NA	DeathBefore31	0
2750	district_12	M	FALSE	177	NA	22	NA	Housewife	73	73	DeathObserved	1
2751	district_12	F	FALSE	175	NA	23	NA	Servant	95	95	DeathObserved	1
2752	district_12	M	FALSE	176	NA	NA	NA	NA	82	82	DeathObserved	1
2753	district_12	M	TRUE	177	35	31	Middle class	Craftswoman	NA	NA	DeathBefore31	0
2754	district_12	M	FALSE	177	NA	23	NA	Craftswoman	88	88	DeathObserved	1
2755	district_12	M	TRUE	176	32	27	Craftsman	Housekeeper	75	75	DeathObserved	1
2756	district_12	F	FALSE	177	NA	20	NA	Housewife	NA	NA	DeathBefore31	0
2757	district_12	F	TRUE	178	27	23	Worker	Worker	NA	NA	DeathBefore31	0
2758	district_12	M	TRUE	178	30	32	Worker	Housewife	75	75	DeathObserved	1
2759	district_12	M	TRUE	178	25	24	Middle class	Worker	77	77	DeathObserved	1
2760	district_12	M	FALSE	181	NA	22	NA	Servant	NA	NA	DeathBefore31	0
2761	district_12	M	TRUE	178	32	34	Upper class	Housewife	68	68	DeathObserved	1
2762	district_12	M	TRUE	181	27	24	Upper class	Housewife	NA	NA	DeathBefore31	0
2763	district_12	M	TRUE	180	25	27	Employee	Servant	NA	NA	DeathBefore31	0
2764	district_12	M	TRUE	181	28	30	Employee	Servant	NA	NA	DeathBefore31	0
2765	district_12	M	TRUE	180	29	28	Worker	Worker	62	62	DeathObserved	1
2766	district_12	F	TRUE	182	26	28	Craftsman	Housekeeper	81	81	DeathObserved	1
2767	district_12	M	TRUE	183	47	28	Employee	NA	89	89	DeathObserved	1
2768	district_12	F	TRUE	180	NA	37	Upper class	Housewife	86	86	DeathObserved	1
2769	district_12	F	TRUE	182	28	30	Shopkeeper	Employee	NA	NA	DeathBefore31	0
2770	district_12	F	TRUE	178	38	36	Employee	Housewife	91	91	DeathObserved	1
2771	district_12	M	TRUE	184	31	24	Employee	Housekeeper	87	87	DeathObserved	1
2772	district_12	M	TRUE	182	28	30	Shopkeeper	Employee	NA	NA	DeathBefore31	0
2773	district_12	F	TRUE	184	28	23	Middle class	UpperMiddleClass	93	93	DeathObserved	1
2774	district_12	F	TRUE	185	25	20	Craftsman	Craftswoman	39	39	DeathObserved	1
2775	district_12	M	FALSE	186	NA	21	NA	Housewife	NA	NA	DeathBefore31	0
2776	district_12	M	TRUE	185	27	24	Employee	Housewife	75	75	DeathObserved	1
2777	district_12	F	TRUE	177	36	33	Worker	Housekeeper	NA	NA	DeathBefore31	0
2778	district_12	F	TRUE	186	25	27	Craftsman	Craftswoman	94	94	DeathObserved	1
2779	district_12	M	TRUE	186	45	35	Shopkeeper	Housewife	NA	NA	DeathBefore31	0
2780	district_12	F	TRUE	187	28	25	Employee	Housewife	NA	101	Alive99	1
2781	district_12	F	FALSE	186	NA	24	NA	Employee	NA	NA	DeathBefore31	0
2782	district_12	F	TRUE	187	34	25	Employee	Servant	NA	NA	DeathBefore31	0
2783	district_12	M	FALSE	187	NA	24	NA	Servant	NA	NA	DeathBefore31	0
2784	district_12	M	FALSE	188	NA	21	NA	Servant	93	93	DeathObserved	1
2785	district_12	F	TRUE	189	26	25	Craftsman	Housewife	94	94	DeathObserved	1
2786	district_12	M	TRUE	190	26	25	Worker	Housekeeper	NA	NA	DeathBefore31	0
2787	district_12	M	TRUE	189	39	33	Craftsman	Craftswoman	45	45	DeathObserved	1
2788	district_12	F	TRUE	189	27	21	Employee	Worker	87	87	DeathObserved	1
2789	district_12	M	TRUE	191	32	28	Shopkeeper	Housewife	NA	NA	DeathBefore31	0
2790	district_12	M	TRUE	189	30	23	Middle class	Employee	NA	NA	DeathBefore31	0
2791	district_12	M	TRUE	191	31	20	Middle class	Housekeeper	NA	NA	DeathBefore31	0
2792	district_12	F	TRUE	192	26	24	Worker	Craftswoman	NA	NA	DeathBefore31	0
2793	district_12	M	FALSE	193	NA	27	NA	Housekeeper	43	43	DeathObserved	1
2794	district_12	F	TRUE	191	31	24	Worker	Employee	77	77	DeathObserved	1
2795	district_12	M	TRUE	191	24	27	Employee	Housewife	NA	NA	DeathBefore31	0
2796	district_12	F	FALSE	192	NA	29	NA	Servant	70	70	DeathObserved	1
2797	district_12	M	TRUE	193	31	29	Worker	Craftswoman	56	56	DeathObserved	1
2798	district_12	F	TRUE	193	32	31	Craftsman	Housewife	95	95	DeathObserved	1
2799	district_12	F	TRUE	194	27	25	Worker	Worker	74	74	DeathObserved	1
2800	district_12	M	TRUE	196	31	29	Worker	Craftswoman	90	90	DeathObserved	1
2801	district_12	F	TRUE	196	29	25	Craftsman	Craftswoman	84	84	DeathObserved	1
2802	district_12	F	TRUE	195	28	22	Craftsman	Housekeeper	NA	NA	DeathBefore31	0
2803	district_12	M	FALSE	198	NA	20	NA	Housekeeper	91	91	DeathObserved	1
2804	district_12	M	TRUE	195	24	23	Shopkeeper	Employee	87	87	DeathObserved	1
2805	district_12	F	TRUE	196	28	30	Worker	Employee	52	52	DeathObserved	1
2806	district_12	M	TRUE	197	29	31	Employee	Housewife	89	89	DeathObserved	1
2807	district_12	M	FALSE	196	NA	19	NA	Housewife	NA	NA	DeathBefore31	0
2808	district_12	M	FALSE	198	NA	29	NA	Craftswoman	83	83	DeathObserved	1
2809	district_12	M	FALSE	197	NA	21	NA	Craftswoman	NA	NA	DeathBefore31	0
2810	district_12	F	TRUE	198	38	33	Employee	Employee	80	80	DeathObserved	1
2811	district_12	M	FALSE	199	NA	27	NA	Housekeeper	58	58	DeathObserved	1
2812	district_12	F	TRUE	199	27	25	Employee	UpperMiddleClass	79	79	DeathObserved	1
2813	district_12	F	FALSE	199	NA	26	NA	Servant	NA	NA	DeathBefore31	0
2814	district_12	M	TRUE	200	48	35	Craftsman	Craftswoman	NA	NA	DeathBefore31	0
2815	district_12	F	TRUE	200	31	28	Employee	Housewife	NA	NA	DeathBefore31	0
2816	district_12	M	TRUE	201	22	26	Craftsman	Craftswoman	NA	NA	DeathBefore31	0
2817	district_12	F	TRUE	202	32	26	Worker	Craftswoman	83	83	DeathObserved	1
2818	district_12	F	FALSE	201	NA	22	NA	Servant	84	84	DeathObserved	1
2819	district_12	M	TRUE	201	27	28	Worker	Worker	44	44	DeathObserved	1
2820	district_12	M	TRUE	201	46	30	Upper class	Housewife	NA	NA	DeathBefore31	0
2821	district_12	F	FALSE	201	NA	29	NA	Craftswoman	90	90	DeathObserved	1
2822	district_12	F	TRUE	204	39	29	Craftsman	Worker	88	88	DeathObserved	1
2823	district_12	F	TRUE	201	28	27	Employee	Employee	63	63	DeathObserved	1
[truncated: 2,806 more rows]
